# Supplementary material for: p300 and cAMP response element‐binding protein‐binding protein in skeletal muscle homeostasis, contractile function, and survival
Source: PubMed Central journal article supplement — J Cachexia Sarcopenia Muscle. 2020 Jan 3;11(2):464–77. doi: 10.1002/jcsm.12522 (PMC7113519; doi:10.1002/jcsm.12522), 2020-01-03
Supplement: JCSM-11-464-s003.pdf [file JCSM-11-464-s003.pdf]

**Table S1. Microarray data from D5 WT and PKCO mice.**

List of significantly (false discovery rate [FDR]<0.1) altered genes in WT vs. PKCO mouse.  
 lr.PCKO.WT (mean log2 ratio of KO vs. WT); fc.PCKO.WT (fold change, PKCO vs. WT); lfrd.PCKO.WT (local FDR of changes between PKCO and WT).

| Gene     | ProbeName     | GENE_SYMBOL  | GENE_NAME                                                | SystematicName     | WT1   | WT2   | WT3    | WT4    | PCKO1   | PCKO2  | PCKO3   | PCKO4   | PCKO5   | Average WT | Average PCKO | lr.PCKO.WT | fc.PCKO.WT | lfrd.PCKO.WT |
|----------|---------------|--------------|----------------------------------------------------------|--------------------|-------|-------|--------|--------|---------|--------|---------|---------|---------|------------|--------------|------------|------------|--------------|
| 64337    | A_51_P149422  | gng13        | guanine nucleotide binding protein G (G13)               | NM_022422          | 6.4   | 2.3   | 3      | 4.2    | 292.3   | 421.7  | 410.5   | 286.6   | 3.975   | 352.75     | 6.55502817   | 94.0226287 | 8.17e-05   |              |
| 69101    | A_52_P162298  | YjcJ         | YJcJ homolog (bacterial)                                 | NM_026940          | 4.7   | 7.1   | 11.4   | 10.4   | 524.6   | 458.2  | 546.7   | 514.3   | 8.4     | 510.95     | 6.00650656   | 64.289292  | 4.35E-05   |              |
| 224022   | A_55_P199740  | Sic7ra4      | lysine carrier family 7 (cation)                         | NM_144852          | 18.5  | 20.1  | 11     | 9.9    | 817.5   | 603.8  | 677.5   | 659.9   | 14.9    | 689.175    | 5.99155165   | 48.2197295 | 4.41E-05   |              |
| 71004    | A_55_P204849  | 493140422Rik | Riken cDNA 493140422 gene                                | NM_027955          | 124   | 91.7  | 85     | 94.1   | 3811.1  | 3876.6 | 4894.2  | 5756.6  | 98.7    | 4885.125   | 5.53165588   | 46.2587982 | 2.86E-06   |              |
| 318642   | A_51_P184669  | ha9b         | RAB9B, member RAS oncogene family                        | NM_176971          | 2.6   | 6.9   | 4.4    | 6.7    | 164.1   | 223.1  | 142     | 196.3   | 5.15    | 181.325    | 5.11834697   | 12.9278939 | 0.00059175 |              |
| 19825    | A_55_P2120169 | Myh8         | myosin, heavy polypeptide 8                              | ENSMUST00000108685 | 2.9   | 2.45  | 2.5    | 93.5   | 136.7   | 93.2   | 75.6    | 126.9   | 5.05    | 99.7       | 5.19086156   | 36.5262456 | 5.67E-06   |              |
| 239731   | A_66_P218442  | Rimbp3       | RIMS binding protein 3                                   | NM_001033338       | 3.1   | 2.7   | 2.8    | 3      | 385.5   | 65.2   | 57.8    | 66.8    | 2.9     | 143.825    | 5.09913599   | 34.276217  | 0.0776892  |              |
| 19825    | A_55_P2030883 | Erv1         | estrogen receptor 1 (alpha)                              | NM_007956          | 35.7  | 19.5  | 18.6   | 19.8   | 995.5   | 929.5  | 526.2   | 697.7   | 23.4    | 787.225    | 5.08440135   | 31.9279263 | 0.0021348  |              |
| 942262   | A_55_P2075070 | Sip5p5       | sphingosine 1-phosphate receptor                         | NM_053190          | 7.1   | 4.4   | 12.1   | 3.1    | 210.5   | 183.9  | 169.8   | 168.3   | 6.076   | 183.125    | 5.21834697   | 11.7199031 | 0.00059977 |              |
| 225362   | A_52_P125467  | Reep2        | receptor accessory protein 2                             | NM_144865          | 3.2   | 5.2   | 3.6    | 8.2    | 130.2   | 140.1  | 125.6   | 126.9   | 5.05    | 130.7      | 4.79373384   | 27.7368844 | 0.00035497 |              |
| 27356    | A_51_P459108  | Insl6        | insulin-like 6                                           | NM_013754          | 33.2  | 30    | 31.8   | 26.4   | 934.9   | 792.9  | 796     | 835.9   | 30.35   | 839.925    | 4.79251293   | 27.134215  | 1.55E-07   |              |
| 197931   | A_51_P157462  | Rgn          | regucanin                                                | NM_009000          | 3     | 3.5   | 6.6    | 2.8    | 96.6    | 125.6  | 102.9   | 186.6   | 3.975   | 103.425    | 4.78019191   | 27.477488  | 0.00031271 |              |
| 16520    | A_51_P167440  | Knip3        | potassium inwardly-rectifying channel subunit 3          | NM_008627          | 7.1   | 4.4   | 12.1   | 3.1    | 210.5   | 183.9  | 169.8   | 168.3   | 6.076   | 183.125    | 5.21834697   | 11.7199031 | 0.00059977 |              |
| 78593    | A_55_P2000943 | Nrip3        | nuclear receptor interacting protein 3                   | NM_020610          | 7.9   | 3.9   | 9      | 6.5    | 175.3   | 189    | 145.2   | 176.2   | 6.025   | 171.425    | 4.71080022   | 26.187372  | 0.0001826  |              |
| 102828   | A_55_P1995512 | Tmem139      | transmembrane protein 139                                | NM_175408          | 2.45  | 28.9  | 18     | 14     | 470     | 541.5  | 551.5   | 555.7   | 21.35   | 529.675    | 4.68443166   | 25.731001  | 0.0336301  |              |
| 20021    | A_55_P234359  | Sct          | secretin                                                 | NM_011328          | 2.4   | 4.6   | 7.5    | 2.7    | 132.8   | 117.9  | 96.4    | 75.2    | 4.85    | 105.575    | 4.50375888   | 22.684468  | 0.00016395 |              |
| 38086    | A_55_P2051138 | Neft1        | neurofilament, heavy polypeptide 1                       | NM_008627          | 7.1   | 4.4   | 12.1   | 3.1    | 210.5   | 183.9  | 169.8   | 168.3   | 6.076   | 183.125    | 5.21834697   | 11.7199031 | 0.00059977 |              |
| 239552   | A_51_P151471  | Apolo8       | apolipoprotein L8                                        | ENSMUST00000070911 | 3.2   | 2.2   | 3      | 3.1    | 62.5    | 62.6   | 47.1    | 65.4    | 2.875   | 59.4       | 4.37248569   | 20.7133026 | 8.04E-06   |              |
| 107528   | A_51_P104430  | Magee1       | melanoma antigen, family E                               | NM_053201          | 2.7   | 2.9   | 2.9    | 2.8    | 51.5    | 59.3   | 58.3    | 65.2    | 2.875   | 58.575     | 4.36954818   | 20.6711706 | 1.30E-07   |              |
| 12447    | A_51_P408984  | Ccrn1        | cyclin E1                                                | NM_007633          | 20.5  | 43.4  | 51.8   | 27.8   | 749.9   | 705.7  | 658     | 622.3   | 35.875  | 683.975    | 4.34191588   | 20.795239  | 0.00038364 |              |
| 11576    | A_55_P207092  | Aldoc        | aldolase C, fructose-biphosphate                         | NM_0096127         | 10.1  | 8.6   | 9.3    | 61.2   | 459.3   | 383.1  | 469.8   | 328.2   | 1670.2  | 35.975     | 1684.325     | 4.32615466 | 20.0202675 | 1.18E-05     |
| 320237   | A_51_P247614  | Ncrn00086    | non-protein coding RNA R6                                | NR_028086          | 8.1   | 4.4   | 6.2    | 3.2    | 94.1    | 130.6  | 94.1    | 89.2    | 5.475   | 102        | 4.28861574   | 19.5434836 | 0.00112894 |              |
| 62485    | A_66_P103316  | Gm6521       | predicted gene 6521                                      | XR_035266          | 3.2   | 2.2   | 3.3    | 3.2    | 59      | 55     | 107.5   | 42.1    | 2.975   | 60.8       | 4.23493847   | 18.8297047 | 0.00292776 |              |
| 56794    | A_55_P2054132 | Tulp2        | tubby-like protein 2                                     | NM_008807          | 2.9   | 2.2   | 2.8    | 2.5    | 51.7    | 53.1   | 49.1    | 41.5    | 2.6     | 48.8       | 4.23367788   | 18.126207  | 0.0000144  |              |
| 11180    | A_51_P13920   | Arct1        | arctic core 1, ceramide-binding                          | NM_008627          | 7.1   | 4.4   | 12.1   | 3.1    | 210.5   | 183.9  | 169.8   | 168.3   | 6.076   | 183.125    | 5.21834697   | 11.7199031 | 0.00059977 |              |
| 74849    | A_52_P630687  | 493041212Rik | Riken cDNA 493041212 gene                                | NM_001475690       | 2.9   | 7.1   | 2.7    | 2.9    | 70.6    | 70.9   | 53.1    | 55.6    | 3.9     | 62.5       | 4.12101968   | 17.4000516 | 0.00335554 |              |
| 10126033 | A_55_P2170911 | Gm10366      | predicted gene 10366                                     | ENSMUST00001005571 | 10.9  | 8.7   | 2.7    | 4.6    | 96      | 90.9   | 88.4    | 108.6   | 6.725   | 95.975     | 4.02954019   | 16.330882  | 0.00365808 |              |
| 81703    | A_51_P254646  | Hp2          | Jun dimerization protein 2                               | NM_030887          | 29.2  | 35.4  | 25.05  | 34.92  | 4953.2  | 3304   | 5564.3  | 6764.3  | 311.475 | 5146.45    | 4.01375772   | 16.1533083 | 0.0028884  |              |
| 14580    | A_55_P2091122 | Kat5l2       | lysine acetyltransferase 5-like 2                        | NM_008627          | 7.1   | 4.4   | 12.1   | 3.1    | 210.5   | 183.9  | 169.8   | 168.3   | 6.076   | 183.125    | 5.21834697   | 11.7199031 | 0.00059977 |              |
| 16777    | A_52_P215170  | Acot4        | acyl-CoA thioesterase 4                                  | NM_132427          | 2.9   | 5.3   | 2.8    | 3.9    | 47.4    | 53.6   | 63.9    | 45.4    | 3.725   | 52.575     | 3.85559818   | 14.0076753 | 0.00023535 |              |
| 194237   | A_52_P69194   | Rimk1a       | ribosomal modification protein 1                         | NM_177572          | 3     | 2.4   | 2.9    | 10.5   | 54      | 50.7   | 53.7    | 64.7    | 4.7     | 55.775     | 3.85124453   | 14.42432   | 0.0872303  |              |
| 272009   | A_51_P230437  | Sfrp12       | serpin/arginine-rich splicing factor 12                  | NM_177774          | 2.9   | 3.9   | 2.7    | 2.8    | 45.7    | 57.4   | 35.7    | 39      | 3.075   | 43.95      | 3.82819397   | 14.2493022 | 4.80E-05   |              |
| 378043   | A_55_P2115595 | Haette       | histone acetyl early transcript 1                        | NM_198129          | 4.5   | 4.3   | 4.3    | 4.3    | 118.7   | 155.8  | 165.6   | 141     | 10.25   | 135.55     | 3.82819397   | 14.2493022 | 4.80E-05   |              |
| 236731   | A_51_P15673   | Usp11        | ubiquitin specific peptidase 11                          | NM_145528          | 56.7  | 66.3  | 51.5   | 78.8   | 842.5   | 914.6  | 945.5   | 828.4   | 63.825  | 883.75     | 3.80697203   | 13.9926488 | 7.47E-06   |              |
| 56226    | A_66_P108003  | Espn         | esponin                                                  | NM_207687          | 2.7   | 2.7   | 2.6    | 2.6    | 38.8    | 27     | 40.2    | 34.2    | 2.525   | 35.05      | 3.79025556   | 13.8350466 | 2.98E-05   |              |
| 218518   | A_51_P451428  | Marvd2       | MARVEL (membrane-associated) domain-containing protein 2 | NM_001038602       | 8.8   | 6.6   | 2.7    | 7.4    | 71      | 100.3  | 66.8    | 84.2    | 6.375   | 80.575     | 3.7687488    | 13.6303321 | 0.0202494  |              |
| 112683   | A_51_P199108  | Usp1         | ubiquitin specific peptidase 1                           | NM_007022          | 354   | 25.8  | 19.7   | 499.3  | 383.1   | 469.8  | 328.2   | 1670.2  | 35.975  | 1684.325   | 4.32615466   | 20.0202675 | 1.18E-05   |              |
| 236031   | A_55_P2131238 | Tc3ra        | transcriptase 3                                          | NM_153392          | 4.2   | 3.1   | 2.9    | 4.1    | 42.2    | 33.2   | 36.4    | 36.4    | 2.975   | 39         | 3.71212161   | 13.1056916 | 2.07E-06   |              |
| 664788   | A_55_P2152165 | Gm7339       | predicted gene 7339                                      | NM_972614          | 2.8   | 1.9   | 2.6    | 3.4    | 33.5    | 34.2   | 33.9    | 35.3    | 2.675   | 34.225     | 3.7083766    | 13.0668334 | 4.32E-05   |              |
| 234878   | A_55_P263933  | Bc021891     | cDNA sequence BC021891                                   | NM_145608          | 2.6   | 1.9   | 2.6    | 2.5    | 34.3    | 28.9   | 27      | 32.9    | 2.4     | 30.775     | 3.68577167   | 12.8684971 | 8.29E-06   |              |
| 17196    | A_55_P1971214 | Mtd1         | methyl-CpG binding domain protein 1                      | NM_013594          | 922.9 | 937.9 | 1032.7 | 1084.1 | 11313.2 | 9146.5 | 14871.1 | 17434.6 | 994.4   | 13116.6    | 3.68161481   | 12.8374237 | 0.00018214 |              |
| 28400    | A_55_P1929291 | Prk11        | protein tyrosine phosphatase kinase 11                   | NM_145630          | 20.1  | 15.1  | 25.8   | 15.2   | 201.8   | 236.6  | 192.2   | 211     | 16.575  | 208.425    | 3.67632321   | 12.8049474 | 3.74E-06   |              |
| 232943   | A_51_P154753  | Klc3         | kelosin light chain 3                                    | NM_146182          | 26.3  | 13.1  | 12     | 21.2   | 262.4   | 261.5  | 187.3   | 19.45   | 231.1   | 3.6592222  | 12.5875207   | 0.0089917  |            |              |
| 61289    | A_55_P209189  | Rfk8         | regulatory factor X 8                                    | NM_001145660       | 2.9   | 2.4   | 4      | 3.2    | 29.7    | 34.3   | 49.7    | 33.7    | 3.125   | 39.4       | 3.65020397   | 12.551205  | 0.0059891  |              |
| 234943   | A_52_P252372  | Kard         | keratin and arginine-rich domain containing protein 2    | NM_175527          | 2.7   | 2.6   | 2.6    | 2.7    | 45.9    | 36.5   | 32.7    | 30.9    | 2.675   | 39.5       | 3.62898798   | 12.309286  | 0.0001826  |              |
| 68846    | A_55_P2038512 | Rnf208       | ring finger protein 208                                  | NM_176834          | 8.8   | 10.2  | 7.1    | 9.3    | 113.9   | 107    | 106.8   | 105.5   | 8.85    | 108.3      | 3.62497686   | 12.3374887 | 3.32E-06   |              |
| 73884    | A_51_P213725  | Zdbf2        | zinc finger, DBP-type containing protein 2               | NM_028673          | 3.4   | 2.1   | 3.8    | 2.7    | 32      | 31     | 40.2    | 40.2    | 4       | 35.85      | 3.60439015   | 12.1626876 | 0.0001826  |              |
| 332397   | A_52_P231232  | Nano1        | nanos homolog 1 (Drosophila)                             | NM_178421          | 3     | 2     | 2.7    | 2.8    | 36.4    | 31.4   | 26.7    | 26.25   | 3.17    | 30.1       | 3.60312791   | 12.1520511 | 2.33E-05   |              |
| 421427   | A_55_P207460  | Gm10424      | predicted gene 10424                                     | ENSMUST00000156905 | 18.7  | 14.7  | 16.8   | 17.9   | 174.9   | 178.2  | 174.9   | 145.92  | 14.525  | 170.175    | 3.5988446    | 13.167843  | 0.0001826  |              |
| 10004254 | A_55_P2019670 | Nps1         | neuropilin 5                                             | NM_001163611       | 2.7   | 6.9   | 2.7    | 5.9    | 47.6    | 62.2   | 48.2    | 44.4    | 4.575   | 50.6       | 3.59548781   | 12.087762  | 0.0175296  |              |
| 279618   | A_66_P109012  | Gm715        | predicted pseudogene 715                                 | NM_205232          | 3.1   | 3.7   | 6.3    | 3.5    | 47.3    | 52.4   | 52.5    | 39.6    | 4.15    | 47.95      | 3.7680295    | 11.9472313 | 0.0007935  |              |
| 70451    | A_55_P2013928 | Dhr13        | dehydrogenase/reductase DHR13                            | NM_183286          | 4.6   | 45.3  | 41.2   | 40.3   | 539.9   | 446.9  | 492.3   | 572.7   | 43.2    | 512.95     | 3.56577622   | 11.8414695 | 1.25E-06   |              |
| 14580    | A_55_P190079  | Kat5l1       | lysine acetyltransferase 5-like 1                        | NM_008627          | 7.1   | 4.4   | 12.1   | 3.1    | 210.5   | 183.9  | 169.8   | 168.3   | 6.076   | 183.125    | 5.21834697   | 11.7199031 | 0.00059977 |              |
| 73381    | A_51_P131725  | Cntn2a       | CK1-f like MARVEL transmembrane protein 2                | NM_027022          | 2.9   | 3.1   | 4.6    | 2.7    | 35.3    | 36     | 37.5    | 41.7    | 3.325   | 37.625     | 3.52980227   | 11.5502347 | 7.72E-05   |              |
| 20420    | A_51_P374818  | Shd          | shc homology 2 domain-containing protein 1               | NM_009168          | 20.4  | 23.2  | 15.1   | 8.8    | 193.1   | 197.3  | 170.5   | 158.8   | 16.875  | 179.925    | 3.5004005    | 11.3168776 | 0.0061691  |              |
| 245404   | A_55_P202497  | Pdcaf1       | DDP1 and CLK4 associated protein 1                       | NM_178739          | 19.9  | 22.3  | 14.3   | 19.7   | 209.6   | 196.9  | 220.4   | 218.6   | 19.05   | 211.375    | 3.48930221   | 11.2301261 | 1.76E-05   |              |
| 252967   | A_55_P124678  | Ropn11       | rop guanine nucleotide exchange factor 11                | NM_145852          | 4.7   | 3.6   | 4.2    | 4.3    | 45.9    | 46.8   | 46.8    | 46.8    | 3.675   | 46.8       | 3.48930221   | 11.2301261 | 1.76E-05   |              |
| 194908   | A_51_P155755  | Pdca2        | SH2 domain containing 5 family, member 2                 | NM_183139          | 19.5  | 11    | 12.5   | 10.7   | 105.2   | 134.6  | 59.6    | 138     | 10.425  | 119.05     | 3.45231523   | 10.9529784 | 0.01249895 |              |
| 230861   | A_55_P2003753 | Sh2o5        | SH2 domain containing 5                                  | NM_001099631       | 12.6  | 4.7   | 5.9    | 12.4   | 87.7    | 98.1   | 94.7    | 76.3    | 8.9     | 89.2       | 3.45214852   | 10.946001  | 0.02430047 |              |
| 268480   | A_55_P206806  | Ragap11      | Rap guanine nucleotide exchange protein 11               | NM_001080925       | 19.9  | 10.2  | 13.7   | 11.4   |         |        |         |         |         |            |              |            |            |              |



|          |               |               |                                |                    |        |         |        |         |         |         |         |         |          |            |            |            |             |            |
|----------|---------------|---------------|--------------------------------|--------------------|--------|---------|--------|---------|---------|---------|---------|---------|----------|------------|------------|------------|-------------|------------|
| 104784   | A_51_P120254  | Fbxw8         | F-box and leucine-rich repeat  | NM_015821          | 45.2   | 230.1   | 49.9   | 48.9    | 190.8   | 220.9   | 289.3   | 50.2    | 232.75   | 2.20262099 | A.60314852 | 4.60314852 | 0.00078474  |            |
| 62386    | A_51_P407999  | 1500011803Rik | RKEN CDNA 1500011803 gene      | NM_027817          | 84.6   | 105.6   | 114.9  | 87.4    | 419.6   | 450.2   | 500.4   | 290.2   | 447.6    | 2.19777883 | A.58708876 | 4.58708876 | 0.0026601   |            |
| 74146    | A_51_P201222  | Armc2         | Armadillo repeat containing    | NM_026139          | 312.5  | 375.1   | 331.2  | 458.1   | 209.7   | 166.2   | 146.0   | 369.1   | 164.0    | 2.19792994 | A.58619919 | 4.58619919 | 0.0169339   |            |
| 21414    | A_51_P244702  | Tcf7          | transcription factor 7, T-cell | NM_009331          | 6.4    | 5.8     | 6.5    | 5.0     | 20.6    | 27.8    | 32.9    | 28.1    | 5.925    | 27.35      | 2.19440167 | A.57699804 | 4.57699804  | 0.0205113  |
| 78479    | A_51_P610265  | 170011911Rik  | RKEN CDNA 170011911 gene       | A0018965           | 2.6    | 2       | 3.5    | 3.6     | 1.5     | 11.7    | 14.5    | 11.2    | 2.925    | 13.1       | 2.19121719 | A.56690854 | 4.56690854  | 0.0196582  |
| 104362   | A_51_P209370  | Mieg1         | meiosis expressed gene 1       | NM_008579          | 2.5    | 3.1     | 2.8    | 2.7     | 16.9    | 12.6    | 14.4    | 8.3     | 2.775    | 13.05      | 2.19070721 | A.56522925 | 4.56522925  | 0.02114182 |
| 208691   | A_51_P181759  | Ubr1          | ubiquitin ligase 1             | NM_017586          | 15.2   | 77.6    | 49.9   | 82.0    | 30.7    | 30.7    | 38.4    | 30.0    | 71.7     | 35.522     | 2.18940305 | A.45611867 | 4.45611867  | 4.406105   |
| 102442   | A_51_P1468240 | Dendtd4       | DENN/MADD domain contain       | NM_01162917        | 38.5   | 37.1    | 34.7   | 47.8    | 173.6   | 171.4   | 182.9   | 174.8   | 38.85    | 175.675    | 2.18857041 | A.51588355 | 4.51588355  | 0.00217243 |
| 214454   | A_51_P6110167 | Trim38        | tripeptide motif-containing    | NM_02029935        | 2.8    | 2.3     | 2.7    | 3       | 8.2     | 18.4    | 14.7    | 9.9     | 2.7      | 12.8       | 2.19361699 | A.52953197 | 4.52953197  | 0.00899397 |
| 661288   | A_51_P2008889 | Mtbls15b1     | thymosin beta 15b1             | NM_001080967       | 588.9  | 646.9   | 536.7  | 573.4   | 267.0   | 261.9   | 249.0   | 283.84  | 586.475  | 2653.325   | 2.17931709 | A.45294242 | 4.45294242  | 1.40E-05   |
| 213989   | A_51_P211110  | Trms2         | transmembrane protein 82       | NM_0145979         | 41     | 23.6    | 41     | 23.6    | 15.1    | 38.6    | 15.6    | 14.6    | 33.5     | 13.7       | 2.17907251 | A.42964907 | 4.42964907  | 0.00219239 |
| 18124    | A_51_P128397  | Nr4a3         | nuclear receptor subfamily 4   | NM_015743          | 3.1    | 2.6     | 3.3    | 3.3     | 13.8    | 15.6    | 15.3    | 10.1    | 3        | 13.7       | 2.17590311 | A.51867975 | 4.51867975  | 0.00189627 |
| 267902   | A_51_P2569794 | Mphosph9      | M-phase phosphoprotein 9       | NM_01081823        | 13     | 13.8    | 18.2   | 20.5    | 71.6    | 80.9    | 67.7    | 70.5    | 72.675   | 2.17253401 | A.50814536 | 4.50814536 | 0.0233421   |            |
| 228550   | A_51_P273699  | hpk4          | inositol 1,4,5-trisphosphate   | NM_146125          | 17.3   | 26.7    | 34.5   | 18.3    | 104.7   | 114.2   | 104.4   | 96.1    | 24.2     | 104.85     | 2.17105368 | A.50352322 | 4.50352322  | 0.0267467  |
| 93878    | A_51_P184223  | Arnc7         | aradyl nucleic acid containi   | NM_026139          | 52.4   | 52.4    | 56.2   | 51.6    | 23.7    | 23.7    | 23.7    | 23.7    | 50.8     | 23.7       | 2.16722231 | A.37333001 | 4.37333001  | 1.93E-06   |
| 190787   | A_51_P476601  | Lyp6          | lymphocyte antigen 167.9       | NM_016523          | 257.3  | 242.6   | 274.9  | 247.2   | 1072.8  | 1121.6  | 1167.3  | 255.5   | 1131.375 | 2.14753134 | A.43063479 | 4.43063479 | 5.27E-06    |            |
| 269717   | A_51_P2066543 | Orai2         | ORAI calcium release-activ     | NM_178751          | 77     | 84      | 100.3  | 93.3    | 479.5   | 465.4   | 326.5   | 319.3   | 88.65    | 397.675    | 2.14658385 | A.42778004 | 4.42778004  | 0.00432745 |
| 17962    | A_51_P2063777 | Naf3          | NF-YA1/transferrin 3           | NM_008674          | 2.8    | 3.7     | 2.7    | 2.7     | 17.9    | 10.9    | 10.9    | 13.6    | 2.975    | 13.265     | 2.14526599 | A.42373818 | 4.42373818  | 0.01022881 |
| 621474   | A_51_P202177  | Nes5b         | neurokinin B 5 (cerebellum)    | NM_002190556       | 15.6   | 15.6    | 15.2   | 15.2    | 228.8   | 230.9   | 197.7   | 192.7   | 40.25    | 207.475    | 2.14513561 | A.42082663 | 4.42082663  | 0.00429239 |
| 76787    | A_51_P2101367 | Pp4a3         | protein tyrosine phosphatase   | NM_029741          | 15.4   | 15.8    | 19     | 20.2    | 82.1    | 73.8    | 72.7    | 79.2    | 17.6     | 76.95      | 2.1363121  | A.39638664 | 4.39638664  | 0.0013845  |
| 61024    | A_51_P444437  | Ptgr1         | prostaglandin reductase 1      | NM_025968          | 32.3   | 310.9   | 263.1  | 268.6   | 1206.2  | 1187.8  | 974.1   | 119.6   | 258.725  | 1120.425   | 2.13077662 | A.43795001 | 4.43795001  | 0.00202211 |
| 78889    | A_51_P271370  | Wdr5          | WD repeat and SOCS box-con     | NM_001042565       | 28.6   | 30.5    | 37.5   | 35      | 240.4   | 131.5   | 176.3   | 128.7   | 32.9     | 144.225    | 2.12882316 | A.43730577 | 4.43730577  | 0.00727514 |
| 67325    | A_51_P252832  | 1700237904Rik | RKEN CDNA 1700237904 gene      | NM_026094          | 568.8  | 567.7   | 567.6  | 532.3   | 1437.9  | 2386.5  | 2426.7  | 2386.5  | 44.65    | 2426.7     | 2.12872231 | A.37333001 | 4.37333001  | 1.93E-06   |
| 1003388  | A_51_P218153  | Gm10614       | predicted gene 10614           | ENSMUST0000089354  | 3.5    | 6.1     | 4.7    | 4.5     | 17.6    | 19.8    | 15.9    | 23.1    | 4.45     | 19.1       | 2.12783274 | A.36928384 | 4.36928384  | 0.02354267 |
| 14678    | A_51_P257133  | Selm          | selenenoprotein 1              | NM_053267          | 125.9  | 129.8   | 98.9   | 1120.7  | 5765.9  | 4078.2  | 4678.3  | 5179.3  | 1165.625 | 5682.925   | 2.12723829 | A.34697068 | 4.34697068  | 0.00220023 |
| 111656   | A_51_P267783  | Hll1          | histone H1-like 1              | NM_008350          | 20.5   | 11.3    | 14.3   | 16.2    | 80.4    | 57.6    | 61.8    | 66.6    | 15.825   | 60.925     | 2.1261712  | A.36557534 | 4.36557534  | 0.0111992  |
| 102941   | A_51_P251062  | 1700237906Rik | RKEN CDNA similar to F-box     | NM_026094          | 52.4   | 52.4    | 56.2   | 51.6    | 23.7    | 23.7    | 23.7    | 23.7    | 50.8     | 23.7       | 2.12434163 | A.43601956 | 4.43601956  | 0.0071573  |
| 23739    | A_51_P201116  | 3hm3b1        | [3hm3]-like 3 (peroxisoma)     | NM_127287          | 127.3  | 147.7   | 146.6  | 127     | 646.7   | 568.8   | 593.1   | 526.8   | 133.9    | 583.85     | 2.12296323 | A.35587784 | 4.35587784  | 3.14E-05   |
| 69590    | A_51_P495232  | Gpx8          | glutathione peroxidase 8 (PM   | NM_027127          | 69.7   | 74.9    | 69.5   | 68.5    | 279.3   | 316.7   | 325.2   | 310.7   | 70.775   | 302.35     | 2.12093969 | A.31307776 | 4.31307776  | 9.42E-06   |
| 54240    | A_51_P214245  | Lch2          | enoyl Coenzyme A hydratase     | NM_026728          | 2208.4 | 2477.9  | 2469.3 | 2705.1  | 10934.9 | 10572.5 | 11056.4 | 10007.7 | 2464.675 | 10642.875  | 2.11305666 | A.32606891 | 4.32606891  | 1.77E-05   |
| 14809    | A_51_P228754  | Lch2          | glutathione reductase, isoform | NM_026728          | 45.5   | 44.8    | 45.5   | 44.8    | 23.7    | 21.5    | 20.8    | 20.8    | 48.0     | 20.8       | 2.11264661 | A.32561569 | 4.32561569  | 0.0023728  |
| 16815    | A_51_P165602  | Lch2          | lysyl-lysyl homocysteine homol | NM_016092          | 140    | 120     | 79.9   | 78.9    | 351.2   | 407.6   | 400.4   | 384.6   | 87.925   | 376.59     | 2.11056341 | A.31827623 | 4.31827623  | 0.0012403  |
| 21241    | A_51_P251432  | Tuba1b        | tubulin, alpha 1B              | NM_011654          | 9939.3 | 11665.4 | 9591.1 | 13403.5 | 50668.6 | 48875.7 | 43777.8 | 48024.9 | 1149.825 | 47736.75   | 2.10877973 | A.31126314 | 4.31126314  | 0.00035572 |
| 20209    | A_51_P203673  | Srk36         | serine/threonine kinase 36 (M  | NM_175031          | 14.4   | 16.1    | 18.7   | 12.5    | 64.1    | 66      | 73      | 60.5    | 15.425   | 65.9       | 2.10738153 | A.33909842 | 4.33909842  | 0.00077278 |
| 27392    | A_51_P273950  | Pign          | phosphatidylinositol glycan    | NM_013794          | 3      | 4.2     | 2.7    | 2.9     | 16.8    | 13.7    | 12.2    | 12      | 3.2      | 10.75      | 2.10397521 | A.29892298 | 4.29892298  | 0.05271228 |
| 61024    | A_51_P191818  | Nes5b         | RKEN domain containing 5       | NM_002190556       | 67.8   | 67.8    | 67.8   | 67.8    | 52.7    | 228.8   | 230.9   | 197.7   | 192.7    | 40.25      | 207.475    | 2.14513561 | A.42082663  | 0.00429239 |
| 319188   | A_51_P6110132 | Hist1h2bp     | histone cluster 1, H2bp        | NM_178202          | 8.5    | 7.1     | 8.1    | 8       | 38.7    | 27.6    | 33.7    | 36.2    | 7.925    | 30.956218  | 2.12744578 | A.50003337 | 4.50003337  | 0.00033357 |
| 17918    | A_51_P2006250 | Myo5a         | myosin VA                      | NM_010864          | 497.4  | 578.6   | 462.5  | 472     | 2285.7  | 2075.5  | 2033    | 216.24  | 502.625  | 2139.15    | 2.09370949 | A.26844774 | 4.26844774  | 4.30E-05   |
| 69716    | A_51_P150709  | Trip13        | thymosin alpha receptor        | NM_027182          | 21.4   | 19.8    | 20.4   | 15.6    | 17.7    | 68.3    | 87.3    | 79.3    | 19.3     | 81.7       | 2.09037007 | A.28555298 | 4.28555298  | 0.00201247 |
| 93820    | A_51_P131181  | Arnc21        | RKEN domain containing 5       | NM_026139          | 129.3  | 129.3   | 129.3  | 129.3   | 74.1    | 68.6    | 68.6    | 68.6    | 68.6     | 68.6       | 2.10911561 | A.23644474 | 4.23644474  | 0.00299797 |
| 10049077 | A_51_P2256148 | LOC10049077   | uncharacterized LOC100490      | A001401            | 9.4    | 16.5    | 13.1   | 12.9    | 61.1    | 54.8    | 52.5    | 47.8    | 12.975   | 54.05      | 2.08113494 | A.23139961 | 4.23139961  | 0.00614714 |
| 230157   | A_51_P1972575 | Tmeff1        | transmembrane protein 1        | NM_021436          | 26.4   | 45.1    | 48.4   | 52.1    | 174.4   | 217.6   | 163.3   | 155     | 43       | 177.625    | 2.0807384  | A.23023673 | 4.23023673  | 0.05251561 |
| 17376    | A_51_P198437  | Erd4          | emerin                         | NM_007927          | 1932.5 | 2103.2  | 1725.6 | 1484.5  | 7395.4  | 5550.9  | 8904.7  | 9632.6  | 1811.45  | 7720.9     | 2.07526893 | A.21422806 | 4.21422806  | 0.0124373  |
| 22960    | A_51_P121288  | Zfp93         | zinc finger protein 938        | NM_0105557         | 32     | 35.7    | 35     | 30.6    | 121.3   | 158.7   | 144.1   | 129.3   | 32.875   | 137.675    | 2.06292481 | A.17835425 | 4.17835425  | 0.00081117 |
| 65480    | A_51_P234493  | R130055M24Rik | RKEN CDNA R130055M24 gene      | NR_107952          | 51     | 39.9    | 46.5   | 45.2    | 206.1   | 150.2   | 209.3   | 200.4   | 45.65    | 191.5      | 2.06148926 | A.17416971 | 4.206148926 | 0.00038157 |
| 92481    | A_51_P2022569 | Pak3          | p21 protein (Cdc42/Rac-activ   | NM_001195049       | 15.8   | 21.9    | 15.5   | 17.5    | 74.7    | 60.4    | 71.1    | 59.7    | 16.675   | 73.875     | 2.05120851 | A.17373575 | 4.205120851 | 0.00398851 |
| 212931   | A_51_P121958  | Arnc201       | RKEN domain containing 1       | NM_026139          | 81.8   | 71.5    | 71.5   | 71.5    | 41.2    | 46.2    | 36.4    | 45.2    | 42.75    | 2.0521671  | A.14774707 | 4.20521671 | 0.01236607  |            |
| 79043    | A_51_P205719  | Spb3          | sp1/ryanodine receptor contai  | BC033467           | 83.2   | 104.3   | 93.9   | 79.3    | 311.4   | 372.7   | 504.5   | 326.5   | 90.175   | 378.775    | 2.05218415 | A.14713375 | 4.205218415 | 0.00636907 |
| 72495    | A_51_P2082418 | Z610206C17Rik | RKEN CDNA Z610206C17 gene      | ENSMUST00000129059 | 11.2   | 8.1     | 7.1    | 9.7     | 33      | 34      | 37.1    | 44.4    | 9.025    | 37.125     | 2.05213488 | A.14719212 | 4.205213488 | 0.00488022 |
| 106305   | A_51_P197718  | hpk4          | neurokinin B 4 (juvenile)      | NM_153424          | 67.9   | 56.3    | 57     | 58.1    | 260.2   | 223.9   | 254.2   | 252.5   | 59.825   | 247.7      | 2.05197191 | A.14546471 | 4.205197191 | 4.408E-05  |
| 6615     | A_51_P193751  | Arnc21        | RKEN domain containing 5       | NM_026139          | 129.3  | 129.3   | 129.3  | 129.3   | 74.1    | 68.6    | 68.6    | 68.6    | 68.6     | 68.6       | 2.10911561 | A.23644474 | 4.23644474  | 0.00299797 |
| 207727   | A_51_P2057083 | SrC38A1       | isolate carrier family 38, mem | NM_134086          | 74.5   | 86.6    | 47.7   | 62.1    |         |         |         |         |          |            |            |            |             |            |

|        |              |                |                                                    |              |        |        |        |        |        |        |        |         |            |            |            |              |             |          |
|--------|--------------|----------------|----------------------------------------------------|--------------|--------|--------|--------|--------|--------|--------|--------|---------|------------|------------|------------|--------------|-------------|----------|
| 634040 | _51_P409955  | Zfp784         | zinc finger protein 784                            | NM_001039532 | 71.99  | 86.4   | 67.4   | 94.1   | 289.9  | 273.8  | 257.7  | 283.625 | 1.83618495 | 3.57064551 | 0.00148527 |              |             |          |
| 150401 | _51_P2170847 | Fboxc7         | F-box protein 7                                    | NM_01163702  | 68.1   | 86.5   | 75.7   | 95.5   | 284.7  | 328.7  | 263.9  | 318.8   | 81.45      | 289.025    | 1.83424982 | 3.56585894   | 0.00145757  |          |
| 147390 | _51_P1967846 | Pfamt1         | pleckstrin/ferrokinase domain containing protein 1 | NM_008851    | 30.8   | 39.3   | 29.6   | 41.0   | 109.3  | 103.4  | 208    | 193.5   | 29.2       | 1066.775   | 1.83405248 | 3.56538597   | 1.38E-05    |          |
| 108811 | _51_P2074483 | Ccdc122        | coiled-coil domain containing 122                  | NM_173569    | 61.3   | 40     | 60.6   | 51     | 202    | 158.3  | 209.9  | 188.8   | 53.725     | 189.75     | 1.83252316 | 3.56159422   | 0.012002017 |          |
| 245671 | _51_P206861  | Klf8           | Kruppel-like factor 8                              | NM_173780    | 9.4    | 11     | 11.9   | 15.8   | 49.5   | 35     | 44.4   | 40.5    | 12.025     | 42.35      | 1.83103568 | 3.55792936   | 0.02324547  |          |
| 67145  | _51_P2136797 | Tomn3a         | translocase of outer mitochondrion 3               | NM_025996    | 237.9  | 242.3  | 257.7  | 228.8  | 907.5  | 831.6  | 920.5  | 769.75  | 2415.379   | 857.75     | 1.82587396 | 3.54521705   | 6.39E-05    |          |
| 73047  | _51_P151511  | Camk2b2        | calcium/calmodulin-dependent kinase 2 beta         | NM_024240    | 391.2  | 401.2  | 382.8  | 321.1  | 1107.9 | 1131.3 | 1027.9 | 1111.3  | 1113.9     | 1113.9     | 1.82569971 | 3.54478892   | 0.000000000 |          |
| 684213 | _51_P2170978 | Krnlk13d       | invariant repeat domain 13 family member D         | NM_026720    | 81.1   | 81.3   | 60     | 74.7   | 275.7  | 262    | 206.8  | 242     | 69.775     | 246.725    | 1.82471414 | 3.54236807   | 0.00252738  |          |
| 14265  | _51_P2183110 | Fmr1           | fragile X mental retardation 1                     | NM_008031    | 53.3   | 52     | 60.1   | 60     | 41.7   | 21.7   | 200.9  | 201.3   | 183.5      | 56.35      | 199.35     | 1.82400995   | 3.54083827  | 6.39E-05 |
| 16600  | _51_P212020  | Klf4           | Kruppel-like factor 4 (Klf4)                       | NM_010637    | 92.92  | 127.94 | 96.24  | 126.81 | 473.7  | 350.14 | 382.05 | 359.68  | 1109.75    | 393.925    | 1.82368689 | 3.54029234   | 0.00088561  |          |
| 72747  | _51_P10859   | Hpsc           | heparan sulfate repeat domain 1                    | NM_010637    | 39.9   | 62.5   | 75.1   | 52.7   | 57.6   | 57.6   | 57.6   | 57.6    | 57.6       | 57.6       | 1.82368689 | 3.54029234   | 0.00088561  |          |
| 219758 | _51_P208220  | Baz1a          | broctomodulin adjacent to zhh1                     | NM_031815    | 91.7   | 115.5  | 116.2  | 115.2  | 401.3  | 371.8  | 395.4  | 390.9   | 111        | 389.85     | 1.81578339 | 3.52050743   | 5.69E-05    |          |
| 71331  | _51_P18854   | 5430411C19iuk  | RIKEN cDNA 5430411C19iuk                           | AK017294     | 12.8   | 8.1    | 12.5   | 16.7   | 47.9   | 37.7   | 39.1   | 46.6    | 12.525     | 42.825     | 1.81204373 | 3.51139662   | 0.0996482   |          |
| 62220  | _51_P153224  | Zhh1c2         | zinc finger, DHHC domain cont                      | NM_025428    | 146    | 140.9  | 128.8  | 123.3  | 488.4  | 457.7  | 499.1  | 503.5   | 134.75     | 472.175    | 1.81025639 | 3.50767899   | 7.62E-05    |          |
| 12705  | _51_P197883  | Ctcf1          | CTCF-interacting transmembrane protein 1           | NM_079827    | 74     | 45.5   | 26.9   | 58.7   | 204.2  | 245.4  | 235.6  | 185.1   | 60.25      | 202.75     | 1.80913359 | 3.50420274   | 0.00328262  |          |
| 76997  | _51_P2310888 | ZK000584M20iuk | RIKEN cDNA ZK000584M20iuk                          | AK013146     | 268.2  | 348.7  | 281.1  | 389.3  | 1143.4 | 1054.3 | 1064.6 | 1054.3  | 1116.925   | 1116.925   | 1.80899711 | 3.50242458   | 0.00242439  |          |
| 167259 | _51_P472901  | Sic3a2         | solute carrier family 3 (anion)                    | NM_005877    | 253.14 | 242.14 | 210.59 | 239.5  | 860.04 | 800.17 | 818.2  | 827.7   | 236.825    | 825.1825   | 1.80660378 | 3.4981781    | 4.136E-05   |          |
| 72084  | _51_P179498  | Fam92a         | family with sequence similar to Fc gamma R1b       | NM_025558    | 480    | 607.7  | 547    | 524.8  | 1961.9 | 1939.7 | 1816.5 | 1747.9  | 539.875    | 1883.3     | 1.80640823 | 3.49770411   | 0.00120805  |          |
| 15070  | _51_P218580  | Hpsc           | heparan sulfate repeat domain 1                    | NM_010637    | 39.9   | 62.5   | 75.1   | 52.7   | 57.6   | 57.6   | 57.6   | 57.6    | 57.6       | 57.6       | 1.82368689 | 3.54029234   | 0.00088561  |          |
| 126661 | _51_P142923  | Chka           | choline kinase alpha                               | NM_013490    | 21.6   | 27.2   | 24     | 27.3   | 102.9  | 105.2  | 77.5   | 74.7    | 25.525     | 90.075     | 1.80480239 | 3.49312929   | 0.00360898  |          |
| 29721  | _51_P134062  | Srbp2          | serine binding protein 2                           | NM_011503    | 116.6  | 120.5  | 90.9   | 86.4   | 382.4  | 390.1  | 296.9  | 371.1   | 103.6      | 360.125    | 1.80466382 | 3.49347742   | 0.00570365  |          |
| 118138 | _51_P2157814 | Gmtds          | GDP-mannose 4, 6-dehydrogenase                     | NM_146041    | 252.5  | 263.6  | 243.2  | 274.8  | 798.1  | 984.6  | 973.7  | 865.7   | 258.525    | 905.525    | 1.80457319 | 3.49329759   | 0.001408    |          |
| 66549  | _51_P238171  | Hsf1b          | HSF1 repeat domain 8                               | NM_020914    | 53.7   | 58     | 67.6   | 71.2   | 205.5  | 204.5  | 244.6  | 228.2   | 62.55      | 217.375    | 1.80548038 | 3.48989861   | 0.00050523  |          |
| 219758 | _51_P208220  | Baz1a          | broctomodulin adjacent to zhh1                     | NM_031815    | 91.7   | 115.5  | 116.2  | 115.2  | 401.3  | 371.8  | 395.4  | 390.9   | 111        | 389.85     | 1.81578339 | 3.52050743   | 5.69E-05    |          |
| 71331  | _51_P18854   | 5430411C19iuk  | RIKEN cDNA 5430411C19iuk                           | AK017294     | 12.8   | 8.1    | 12.5   | 16.7   | 47.9   | 37.7   | 39.1   | 46.6    | 12.525     | 42.825     | 1.81204373 | 3.51139662   | 0.0996482   |          |
| 62220  | _51_P153224  | Zhh1c2         | zinc finger, DHHC domain cont                      | NM_025428    | 146    | 140.9  | 128.8  | 123.3  | 488.4  | 457.7  | 499.1  | 503.5   | 134.75     | 472.175    | 1.81025639 | 3.50767899   | 7.62E-05    |          |
| 12705  | _51_P197883  | Ctcf1          | CTCF-interacting transmembrane protein 1           | NM_079827    | 74     | 45.5   | 26.9   | 58.7   | 204.2  | 245.4  | 235.6  | 185.1   | 60.25      | 202.75     | 1.80913359 | 3.50420274   | 0.00328262  |          |
| 76997  | _51_P2310888 | ZK000584M20iuk | RIKEN cDNA ZK000584M20iuk                          | AK013146     | 268.2  | 348.7  | 281.1  | 389.3  | 1143.4 | 1054.3 | 1064.6 | 1054.3  | 1116.925   | 1116.925   | 1.80899711 | 3.50242458   | 0.00242439  |          |
| 167259 | _51_P472901  | Sic3a2         | solute carrier family 3 (anion)                    | NM_005877    | 253.14 | 242.14 | 210.59 | 239.5  | 860.04 | 800.17 | 818.2  | 827.7   | 236.825    | 825.1825   | 1.80660378 | 3.4981781    | 4.136E-05   |          |
| 72084  | _51_P179498  | Fam92a         | family with sequence similar to Fc gamma R1b       | NM_025558    | 480    | 607.7  | 547    | 524.8  | 1961.9 | 1939.7 | 1816.5 | 1747.9  | 539.875    | 1883.3     | 1.80640823 | 3.49770411   | 0.00120805  |          |
| 15070  | _51_P218580  | Hpsc           | heparan sulfate repeat domain 1                    | NM_010637    | 39.9   | 62.5   | 75.1   | 52.7   | 57.6   | 57.6   | 57.6   | 57.6    | 57.6       | 57.6       | 1.82368689 | 3.54029234   | 0.00088561  |          |
| 126661 | _51_P142923  | Chka           | choline kinase alpha                               | NM_013490    | 21.6   | 27.2   | 24     | 27.3   | 102.9  | 105.2  | 77.5   | 74.7    | 25.525     | 90.075     | 1.80480239 | 3.49312929   | 0.00360898  |          |
| 29721  | _51_P134062  | Srbp2          | serine binding protein 2                           | NM_011503    | 116.6  | 120.5  | 90.9   | 86.4   | 382.4  | 390.1  | 296.9  | 371.1   | 103.6      | 360.125    | 1.80466382 | 3.49347742   | 0.00570365  |          |
| 118138 | _51_P2157814 | Gmtds          | GDP-mannose 4, 6-dehydrogenase                     | NM_146041    | 252.5  | 263.6  | 243.2  | 274.8  | 798.1  | 984.6  | 973.7  | 865.7   | 258.525    | 905.525    | 1.80457319 | 3.49329759   | 0.001408    |          |
| 66549  | _51_P238171  | Hsf1b          | HSF1 repeat domain 8                               | NM_020914    | 53.7   | 58     | 67.6   | 71.2   | 205.5  | 204.5  | 244.6  | 228.2   | 62.55      | 217.375    | 1.80548038 | 3.48989861   | 0.00050523  |          |
| 219758 | _51_P208220  | Baz1a          | broctomodulin adjacent to zhh1                     | NM_031815    | 91.7   | 115.5  | 116.2  | 115.2  | 401.3  | 371.8  | 395.4  | 390.9   | 111        | 389.85     | 1.81578339 | 3.52050743   | 5.69E-05    |          |
| 71331  | _51_P18854   | 5430411C19iuk  | RIKEN cDNA 5430411C19iuk                           | AK017294     | 12.8   | 8.1    | 12.5   | 16.7   | 47.9   | 37.7   | 39.1   | 46.6    | 12.525     | 42.825     | 1.81204373 | 3.51139662   | 0.0996482   |          |
| 62220  | _51_P153224  | Zhh1c2         | zinc finger, DHHC domain cont                      | NM_025428    | 146    | 140.9  | 128.8  | 123.3  | 488.4  | 457.7  | 499.1  | 503.5   | 134.75     | 472.175    | 1.81025639 | 3.50767899   | 7.62E-05    |          |
| 12705  | _51_P197883  | Ctcf1          | CTCF-interacting transmembrane protein 1           | NM_079827    | 74     | 45.5   | 26.9   | 58.7   | 204.2  | 245.4  | 235.6  | 185.1   | 60.25      | 202.75     | 1.80913359 | 3.50420274   | 0.00328262  |          |
| 76997  | _51_P2310888 | ZK000584M20iuk | RIKEN cDNA ZK000584M20iuk                          | AK013146     | 268.2  | 348.7  | 281.1  | 389.3  | 1143.4 | 1054.3 | 1064.6 | 1054.3  | 1116.925   | 1116.925   | 1.80899711 | 3.50242458   | 0.00242439  |          |
| 167259 | _51_P472901  | Sic3a2         | solute carrier family 3 (anion)                    | NM_005877    | 253.14 | 242.14 | 210.59 | 239.5  | 860.04 | 800.17 | 818.2  | 827.7   | 236.825    | 825.1825   | 1.80660378 | 3.4981781    | 4.136E-05   |          |
| 72084  | _51_P179498  | Fam92a         | family with sequence similar to Fc gamma R1b       | NM_025558    | 480    | 607.7  | 547    | 524.8  | 1961.9 | 1939.7 | 1816.5 | 1747.9  | 539.875    | 1883.3     | 1.80640823 | 3.49770411   | 0.00120805  |          |
| 15070  | _51_P218580  | Hpsc           | heparan sulfate repeat domain 1                    | NM_010637    | 39.9   | 62.5   | 75.1   | 52.7   | 57.6   | 57.6   | 57.6   | 57.6    | 57.6       | 57.6       | 1.82368689 | 3.54029234   | 0.00088561  |          |
| 126661 | _51_P142923  | Chka           | choline kinase alpha                               | NM_013490    | 21.6   | 27.2   | 24     | 27.3   | 102.9  | 105.2  | 77.5   | 74.7    | 25.525     | 90.075     | 1.80480239 | 3.49312929   | 0.00360898  |          |
| 29721  | _51_P134062  | Srbp2          | serine binding protein 2                           | NM_011503    | 116.6  | 120.5  | 90.9   | 86.4   | 382.4  | 390.1  | 296.9  | 371.1   | 103.6      | 360.125    | 1.80466382 | 3.49347742   | 0.00570365  |          |
| 118138 | _51_P2157814 | Gmtds          | GDP-mannose 4, 6-dehydrogenase                     | NM_146041    | 252.5  | 263.6  | 243.2  | 274.8  | 798.1  | 984.6  | 973.7  | 865.7   | 258.525    | 905.525    | 1.80457319 | 3.49329759   | 0.001408    |          |
| 66549  | _51_P238171  | Hsf1b          | HSF1 repeat domain 8                               | NM_020914    | 53.7   | 58     | 67.6   | 71.2   | 205.5  | 204.5  | 244.6  | 228.2   | 62.55      | 217.375    | 1.80548038 | 3.48989861   | 0.00050523  |          |
| 219758 | _51_P208220  | Baz1a          | broctomodulin adjacent to zhh1                     | NM_031815    | 91.7   | 115.5  | 116.2  | 115.2  | 401.3  | 371.8  | 395.4  | 390.9   | 111        | 389.85     | 1.81578339 | 3.52050743   | 5.69E-05    |          |
| 71331  | _51_P18854   | 5430411C19iuk  | RIKEN cDNA 5430411C19iuk                           | AK017294     | 12.8   | 8.1    | 12.5   | 16.7   | 47.9   | 37.7   | 39.1   | 46.6    | 12.525     | 42.825     | 1.81204373 | 3.51139662   | 0.0996482   |          |
| 62220  | _51_P153224  | Zhh1c2         | zinc finger, DHHC domain cont                      | NM_025428    | 146    | 140.9  | 128.8  | 123.3  | 488.4  | 457.7  | 499.1  | 503.5   | 134.75     | 472.175    | 1.81025639 | 3.50767899   | 7.62E-05    |          |
| 12705  | _51_P197883  | Ctcf1          | CTCF-interacting transmembrane protein 1           | NM_079827    | 74     | 45.5   | 26.9   | 58.7   | 204.2  | 245.4  | 235.6  | 185.1   | 60.25      | 202.75     | 1.80913359 | 3.50420274   | 0.00328262  |          |
| 76997  | _51_P2310888 | ZK000584M20iuk | RIKEN cDNA ZK000584M20iuk                          | AK013146     | 268.2  | 348.7  | 281.1  | 389.3  | 1143.4 | 1054.3 | 1064.6 | 1054.3  | 1116.925   | 1116.925   | 1.80899711 | 3.50242458   | 0.00242439  |          |
| 167259 | _51_P472901  | Sic3a2         | solute carrier family 3 (anion)                    | NM_005877    | 253.14 | 242.14 | 210.59 | 239.5  | 860.04 | 800.17 | 818.2  | 827.7   | 236.825    | 825.1825   | 1.80660378 | 3.4981781    | 4.136E-05   |          |
| 72084  | _51_P179498  | Fam92a         | family with sequence similar to Fc gamma R1b       | NM_025558    | 480    | 607.7  | 547    | 524.8  | 1961.9 | 1939.7 | 1816.5 | 1747.9  | 539.875    | 1883.3     | 1.80640823 | 3.49770411   | 0.00120805  |          |
| 15070  | _51_P218580  | Hpsc           | heparan sulfate repeat domain 1                    | NM_010637    | 39.9   | 62.5   | 75.1   | 52.7   | 57.6   | 57.6   | 57.6   | 57.6    | 57.6       | 57.6       | 1.82368689 | 3.54029234   | 0.00088561  |          |
| 126661 | _51_P142923  | Chka           | choline kinase alpha                               | NM_013490    | 21.6   | 27.2   | 24     | 27.3   | 102.9  | 105.2  | 77.5   | 74.7    | 25.525     | 90.075     | 1.80480239 | 3.49312929   | 0.00360898  |          |
| 29721  | _51_P134062  | Srbp2          | serine binding protein 2                           | NM_011503    | 116.6  | 120.5  | 90.9   | 86.4   | 382.4  | 390.1  | 296.9  | 371.1   | 103.6      | 360.125    | 1.80466382 | 3.49347742   | 0.00570365  |          |
| 118138 | _51_P2157814 | Gmtds          | GDP-mannose 4, 6-dehydrogenase                     | NM_146041    | 252.5  | 263.6  | 243.2  | 274.8  | 798.1  | 984.6  | 973.7  | 865.7   | 258.525    | 905.525    | 1.80457319 | 3.49329759   | 0.001408    |          |
| 66549  | _51_P238171  | Hsf1b          | HSF1 repeat domain 8                               | NM_020914    | 53.7   | 58     | 67.6   | 71.2   | 205.5  | 204.5  | 244.6  | 228.2   | 62.55      | 217.375    | 1.80548038 | 3.48989861</ |             |          |



|         |               |              |                                  |                    |        |        |        |        |        |        |         |          |            |            |            |            |            |           |
|---------|---------------|--------------|----------------------------------|--------------------|--------|--------|--------|--------|--------|--------|---------|----------|------------|------------|------------|------------|------------|-----------|
| 78369   | A_51_P235726  | Kcna4        | Intercellular adhesion molecule  | NM_028392          | 115.4  | 93.2   | 112.8  | 90.3   | 302.7  | 268.1  | 262.1   | 262.1    | 1.4171835  | 2.6703628  | 0.0003650  |            |            |           |
| 238799  | A_52_P480939  | Tnpo1        | transportin 1                    | NM_178716          | 617.4  | 682.9  | 676.1  | 764.6  | 1908.8 | 1696.5 | 1851.1  | 1832.5   | 1832.5     | 1.4138283  | 2.6644326  | 0.0009762  |            |           |
| 122654  | A_51_P192111  | Rpl33        | rRNA 33S protein L33             | NM_016747          | 25.3   | 24.6   | 26.9   | 26.9   | 69.0   | 73.9   | 71.4    | 78.4     | 1.4141245  | 2.6533783  | 0.0046394  |            |            |           |
| 71088   | A_55_P2011328 | 4933412E12IK | RIKEN DNA 4933412E12             | NM_105385          | 38.2   | 50.4   | 33.8   | 33.4   | 102.9  | 106.7  | 109.7   | 89.5     | 1.4080427  | 2.6537688  | 0.0043463  |            |            |           |
| 72121   | A_55_P2011328 | Armc10       | armadillo repeat containing      | NM_026034          | 284.9  | 326.4  | 308.3  | 360.7  | 821.6  | 877.5  | 859.6   | 839.9    | 1.40646347 | 2.6508174  | 0.0070234  |            |            |           |
| 68596   | A_51_P198387  | Uchl1        | ubiquitin-like kinase 1-like     | NM_020705          | 303.4  | 344    | 393    | 450.4  | 941.5  | 941    | 988.5   | 1041.3   | 372.7      | 978.075    | 1.40613821 | 2.6500318  |            |           |
| 61393   | A_51_P198387  | Uchl1        | ubiquitin-like kinase 1-like     | NM_020705          | 194.7  | 194.7  | 184.5  | 197.7  | 509.1  | 509.1  | 478.4   | 638.1    | 234.0      | 406.16321  | 2.6501319  | 0.0024798  |            |           |
| 59124   | A_66_P107536  | Klc1         | kinase cytoskeleton class 1      | NM_008450          | 140.7  | 123.8  | 130.3  | 123.9  | 317.4  | 308.3  | 306.9   | 374.3    | 129.675    | 1.40593921 | 2.6499308  | 0.0018252  |            |           |
| 79129   | A_52_P151036  | Httat2       | predicted gene 958               | ENSMUST00000068250 | 45.8   | 54     | 54.6   | 73.4   | 140.6  | 134.2  | 161.3   | 172.2    | 58.32      | 152.25     | 1.40140788 | 2.6459204  | 0.0673386  |           |
| 212664  | A_51_P13732   | Cdc136       | low-calcium domain containing    | NM_012283          | 106.2  | 145.3  | 146    | 153    | 458.5  | 335.6  | 321.5   | 378.1    | 137.625    | 363.425    | 1.40015368 | 2.6393995  | 0.0082846  |           |
| 19893   | A_55_P196883  | Rgr          | retinoid pigmentosa GTPase       | NM_01177950        | 144.9  | 126.6  | 145.3  | 154.3  | 394.1  | 357.5  | 385.7   | 364.8    | 142.775    | 375.525    | 1.39774553 | 2.6348951  | 0.0051376  |           |
| 13859   | A_52_P528963  | Rcep1        | epidermal growth factor rec      | NM_01122832        | 116.3  | 78.8   | 78.3   | 103.7  | 230.9  | 245.1  | 248.1   | 255      | 94.275     | 244.775    | 1.39710973 | 2.6337345  | 0.0340353  |           |
| 74191   | A_51_P28159   | Ppappcb1b    | phosphatidic acid phosphatase    | NM_028000          | 178.7  | 209.3  | 230.9  | 221    | 527    | 545.9  | 574     | 554.9    | 209.975    | 550.45     | 1.39632229 | 2.6322819  | 0.00134824 |           |
| 15158   | A_55_P102843  | Uchl1        | ubiquitously expressed trans     | BC029294           | 272.7  | 252    | 262    | 269    | 759.9  | 759.9  | 648.7   | 681      | 262.375    | 381.39756  | 2.6320925  | 0.0009314  |            |           |
| 72251   | A_55_P1957378 | Unc119       | unc-119 homolog (C. elegans)     | NM_011676          | 653.7  | 619.3  | 797.2  | 705.3  | 1849.2 | 1826.2 | 1779.3  | 1871.1   | 692.25     | 1891.4     | 1.39314436 | 2.6265056  | 0.00117993 |           |
| 72248   | A_51_P246339  | Rlc5         | regulation factor C (activator   | NM_028128          | 24.2   | 282.3  | 209.5  | 275.1  | 720.5  | 672.6  | 629.9   | 617.4    | 252.225    | 680.59     | 1.3928889  | 2.6264003  | 0.0062420  |           |
| 68852   | A_51_P19414   | Rpl33        | ribosomal protein L33            | NM_020705          | 19.4   | 19.4   | 19.4   | 19.4   | 266.8  | 225.2  | 225.2   | 224.4    | 80.375     | 399.225    | 1.3910896  | 2.6231049  | 0.0002169  |           |
| 57361   | A_52_P335660  | 5133401N09nk | RIKEN DNA 5133401N09             | NM_198004          | 278.8  | 265.1  | 215    | 219.8  | 670.3  | 614.7  | 652.3   | 615.5    | 244.675    | 638.2      | 1.39142216 | 2.6231756  | 0.0005264  |           |
| 54546   | A_52_P372151  | Cttnn1       | catenin (cadherin associated)    | NM_018761          | 501.9  | 511    | 560    | 518.8  | 1363.2 | 1277.9 | 1410.1  | 523.425  | 1373.325   | 1.38923418 | 2.6199599  | 0.0002564  |            |           |
| 76221   | A_51_P147373  | Dpp3         | dppetifyp binding protein 3      | NM_133803          | 1627.4 | 1382.7 | 1454.8 | 983.7  | 3770.8 | 3409.9 | 3591    | 283.6    | 1362.15    | 3513.075   | 1.38895652 | 2.6188911  | 0.06639271 |           |
| 68878   | A_55_P203020  | Uchl1        | RKCS binding protein 1           | NM_020618          | 21     | 21.2   | 32.2   | 25     | 61.1   | 61.1   | 51.2    | 35.2     | 26         | 61.1       | 1.38870076 | 2.6185262  | 0.02834322 |           |
| 72254   | A_55_P205148  | Camsap3      | calmodulin regulated spectri     | NM_01163749        | 140    | 108.2  | 111.7  | 87.8   | 320.9  | 299.2  | 276.3   | 287.7    | 111.925    | 288.75     | 1.38212624 | 2.6068597  | 0.0011978  |           |
| 12875   | A_51_P363947  | Cdk1a        | cyclin-dependent kinase inh      | NM_007669          | 570.4  | 400.4  | 452.2  | 422.4  | 1577.5 | 1040   | 1241.6  | 1201.3   | 483.85     | 1265.1     | 1.37930727 | 2.6014329  | 0.0055529  |           |
| 76898   | A_55_P198786  | Adck4        | acyl domain containing kinase    | NM_133770          | 234.4  | 220.9  | 212.9  | 218.7  | 665.6  | 556.8  | 523     | 586      | 221.725    | 577.85     | 1.37850406 | 2.5998637  | 0.0060491  |           |
| 55354   | A_55_P211595  | Dnaja2       | DnaJ domain containing           | NM_020295          | 780.0  | 780.0  | 780.0  | 780.0  | 2492.8 | 2492.8 | 2677.95 | 1984.625 | 1874.5525  | 2.5962615  | 0.0012779  |            |            |           |
| 108902  | A_51_P305320  | Zfp11        | UDP-GlcNAc 6-epimerase 1         | NM_175383          | 1873.1 | 1898.2 | 2134.9 | 1961   | 4729.4 | 4768.1 | 5482.3  | 5449.6   | 1966.15    | 5107.35    | 1.37504633 | 2.5937675  | 0.00073001 |           |
| 151861  | A_55_P2009792 | Hidac6       | histone deacetylase 6            | NM_010413          | 1340.6 | 1377.7 | 1380.1 | 1322.1 | 3544.8 | 3557.4 | 3498    | 3548.8   | 1956.6     | 3512.25    | 1.37417215 | 2.5913707  | 0.0004235  |           |
| 73991   | A_52_P526396  | Anl1         | atlantin GTPase 1                | NM_178628          | 46.9   | 49.1   | 40.9   | 56     | 121.7  | 137.4  | 129.5   | 120.6    | 49.225     | 127.3      | 1.37378808 | 2.59150124 | 0.0012818  |           |
| 66949   | A_55_P2030938 | Uchl1        | ubiquitin domain containing      | NM_020705          | 41.5   | 47.5   | 41.5   | 47.5   | 153.6  | 153.6  | 127.6   | 100.4    | 46.75      | 121.1      | 1.3735709  | 2.5911477  | 0.0002763  |           |
| 26447   | A_55_P2053497 | Pot1         | polycomb (DNA directed)          | NM_011972          | 165.6  | 104.4  | 90.9   | 81.3   | 215.1  | 183.9  | 238.1   | 296.1    | 90.925     | 237.9      | 1.37253502 | 2.5892838  | 0.06895061 |           |
| 19090   | A_51_P241667  | Pknox        | protein kinase, DNA activator    | NM_011519          | 151.8  | 133.3  | 160.4  | 157.7  | 414.5  | 332    | 429     | 389.6    | 150.8      | 390.5      | 1.36983959 | 2.5844183  | 0.0309427  |           |
| 85841   | A_55_P233082  | AL019278     | expressed sequence AU192         | AL0404967          | 53     | 60.5   | 43.5   | 51.8   | 168.9  | 113.2  | 129.9   | 129.6    | 52.2       | 135.4      | 1.36931395 | 2.5800098  | 0.0595251  |           |
| 545861  | A_55_P205572  | Uchl1        | predicted gene 578               | NM_01034902        | 27.7   | 26     | 27.8   | 29.8   | 72.4   | 72.4   | 67.1    | 75.2     | 27.425     | 71.725     | 1.36655979 | 2.5784958  | 0.0003722  |           |
| 30045   | A_51_P442284  | Dnaja2       | DnaJ domain homolog, subfam      | NM_010844          | 1531.1 | 1463   | 1599.7 | 1624.8 | 4088.4 | 3878.4 | 4384.2  | 3899.25  | 1554.75    | 3949.225   | 1.3662526  | 2.5741949  | 0.0002169  |           |
| 11556   | A_52_P206613  | Uchl1        | evolutionary (multiple)-like 2   | NM_012138          | 720.1  | 751.3  | 637.4  | 748.3  | 1968.3 | 1763.3 | 1836.2  | 1696.7   | 1714.275   | 1716.26    | 1.36268107 | 2.57152792 | 0.0091162  |           |
| 10525   | A_55_P207809  | Ahd8461      | adenylosuccinate synthetase      | NM_074222          | 252    | 236.6  | 294.3  | 218.4  | 557.1  | 620    | 699.2   | 693.9    | 250.325    | 642.55     | 1.3626258  | 2.57152792 | 0.01132459 |           |
| 10525   | A_55_P207809  | Ahd8461      | adenylosuccinate synthetase      | AB048465           | 33.6   | 32.6   | 41     | 38.9   | 92     | 89.2   | 97.9    | 95.9     | 36.525     | 93.525     | 1.36250108 | 2.5710366  | 0.00168801 |           |
| 619331  | A_52_P200777  | Uchl1        | expressed sequence 51            | NM_00103380        | 80.4   | 80.4   | 80.4   | 80.4   | 231.2  | 192.8  | 192.8   | 192.8    | 80.4       | 92.475     | 1.35966362 | 2.5685925  | 0.0002169  |           |
| 21874   | A_51_P27847   | 3830406C13nk | RIKEN DNA 3830406C13             | NM_146051          | 195.8  | 214    | 220.7  | 191.1  | 473.5  | 513.8  | 591.4   | 531.1    | 205.4      | 527.45     | 1.35857078 | 2.5643108  | 0.00152835 |           |
| 7588    | A_52_P123738  | Rnf41        | ringer finger protein 41         | NM_01164237        | 28     | 33.9   | 39.1   | 36.4   | 84.5   | 81.9   | 77      | 109.6    | 34.35      | 88.25      | 1.35850749 | 2.5641969  | 0.0522688  |           |
| 113006  | A_51_P211491  | Gusb         | glucuronidase, beta              | NM_010368          | 399.1  | 399.6  | 376.6  | 371.2  | 1009.9 | 1009.2 | 990.7   | 984      | 386.625    | 900.8      | 1.35815777 | 2.5633768  | 0.0004235  |           |
| 66868   | A_55_P100445  | Ctcf         | transcription elongation fact    | NM_010570          | 71.8   | 71.8   | 71.8   | 71.8   | 192    | 192    | 214.2   | 214.2    | 67.8       | 214.2      | 1.3564445  | 2.5629287  | 0.0002169  |           |
| 23033   | A_55_P2186352 | Tnc12        | triple helix repeat domain       | NM_172770          | 503.3  | 447.9  | 427.7  | 537.5  | 1176.6 | 1246.4 | 1260.9  | 1180.7   | 479.475    | 1293.3     | 1.35566548 | 2.5609295  | 0.0012818  |           |
| 232440  | A_55_P2099540 | H2afj        | H2A histone family, member       | NM_177688          | 103.7  | 111.7  | 101.5  | 83.7   | 214.8  | 253.2  | 232.2   | 272.4    | 100.15     | 255.9      | 1.3564477  | 2.5608722  | 0.00817296 |           |
| 330604  | A_55_P2001812 | Sic5a6       | sic5a carrier family 5 (tadpole) | NM_01117621        | 649.6  | 836.5  | 745.8  | 871.9  | 2159   | 1768.8 | 2009.5  | 775.95   | 1978.125   | 1.35550524 | 2.5588873  | 0.0089839  |            |           |
| 3058    | A_55_P133133  | Hif1a        | hypoxia-inducible factor 1       | NM_010921          | 419.6  | 419.6  | 419.6  | 419.6  | 1247.1 | 1247.1 | 1411.7  | 1954.188 | 1558.715   | 410.1      | 612.15     | 1.3544761  | 2.5581574  | 0.0002169 |
| 76121   | A_51_P108252  | Gpm2         | G-protein signalling molecule    | NM_029522          | 81.6   | 101.9  | 93.2   | 89.8   | 250    | 245.2  | 237.4   | 204.1    | 91.625     | 234.275    | 1.35455637 | 2.5571847  | 0.0028887  |           |
| 14697   | A_55_P2000643 | Gnb5         | guanine nucleotide binding       | ENSMUST0000008556  | 776.9  | 788.6  | 595.6  | 810    | 2204   | 1721.6 | 1604.6  | 2011     | 712.925    | 1897.8     | 1.35454875 | 2.55711712 | 0.03179292 |           |
| 30256   | A_55_P208158  | Denn5b       | DENM/MADD domain contain         | NM_177192          | 497.9  | 661.8  | 539.8  | 725.6  | 1435.6 | 1472.5 | 1623.2  | 1600     | 606.275    | 1534.325   | 1.35403394 | 2.55642115 | 0.02366902 |           |
| 71490   | A_51_P178989  | Uchl1        | helicase domain containing       | NM_01163470        | 51.7   | 51.7   | 51.7   | 51.7   | 172.4  | 140.2  | 140.2   | 140.2    | 51.7       | 62.7       | 1.35403394 | 2.55642115 | 0.0073699  |           |
| 407864  | A_55_P2331580 | CD02402      | expressed sequence BC02402       | NM_013219          | 42.9   | 36.2   | 37.8   | 53.2   | 109.9  | 93.5   | 104.8   | 123.7    | 42.925     | 107.975    | 1.35361661 | 2.5559922  | 0.04895045 |           |
| 437440  | A_51_P432779  | Tmem231      | transmembrane protein 231        | NM_00103321        | 13.4   | 15.5   | 17.3   | 15.4   | 37.1   | 51.2   | 35.2    | 35.3     | 15.4       | 37.1       | 1.35365075 | 2.5555999  | 0.04981338 |           |
| 22051   | A_52_P382914  | Trip6        | thyroid hormone receptor int     | NM_011639          | 717    | 930.2  | 840.8  | 849.8  | 1825.7 | 2237.4 | 2589.2  | 1916.4   | 834.45     | 2142.175   | 1.35262259 | 2.5537937  | 0.0270234  |           |
| 407788  | A_55_P224472  | Trip6        | thyroid hormone receptor int     | NM_011639          | 106    | 106    | 106    | 106    | 292    | 292    | 292     | 292      | 106        | 292        | 1.35262259 | 2.5537937  | 0.0002169  |           |
| 1003904 | A_55_P2055168 | Gm21b6       | predicted gene 2016              | NM_01122662        | 105.8  | 153.5  | 140.6  | 162.6  | 367.6  | 376.7  | 305.7   | 370.9    | 140.625    | 355.225    | 1.35054937 | 2.5500213  | 0.0002169  |           |
| 67706   | A_52_P228031  | T            |                                  |                    |        |        |        |        |        |        |         |          |            |            |            |            |            |           |

|         |               |           |                                                           |             |         |         |         |         |         |         |         |         |          |           |            |            |           |
|---------|---------------|-----------|-----------------------------------------------------------|-------------|---------|---------|---------|---------|---------|---------|---------|---------|----------|-----------|------------|------------|-----------|
| 107121  | A_55_P2131607 | Tnnaup1ap | TrnaU domain 1 assoc                                      | 319.9       | 329.1   | 380     | 388.1   | 839.9   | 794.7   | 860.2   | 897.3   | 354.275 | 2.400701 | 0.0022823 |            |            |           |
| 11      | A_55_P199921  | Tnrd7     | trna domain containing 7                                  | NM_146142   | 1516.5  | 1858.6  | 1656.3  | 1940    | 4519.7  | 4012.2  | 3999.2  | 419.9   | 1742.85  | 0.0042949 |            |            |           |
| 11637   | A_55_P204968  | Tnrd8     | trna domain containing 8                                  | NM_079789   | 205     | 22      | 15      | 574     | 25      | 574     | 25      | 49.15   | 1.262548 | 0.0144981 |            |            |           |
| 69641   | A_55_P2108579 | Phkg2     | phosphorylase kinase, gamma                               | NM_026888   | 1679.3  | 1670.7  | 1554.9  | 1470.3  | 3947.5  | 3639.4  | 3719.6  | 3972    | 1593.8   | 0.0005265 |            |            |           |
| 28980   | A_55_P2044252 | Znf512b   | zinc finger protein 512b                                  | NM_01164597 | 1714.7  | 1359    | 1514.1  | 1570.7  | 4239.3  | 3469.4  | 3293.4  | 3851.6  | 1554.625 | 0.0012829 |            |            |           |
| 66260   | A_55_P264229  | Irf5      | inhibitor of growth factor, nm                            | NM_025454   | 126.7   | 145.9   | 136     | 141.7   | 37.9    | 20.4    | 327.4   | 364.3   | 137.975  | 0.0213094 |            |            |           |
| 701317  | A_55_P212810  | Irf7      | inhibitor of growth factor, nm                            | NM_025454   | 138.9   | 194.1   | 138.9   | 170.2   | 37.1    | 401.5   | 379.8   | 161     | 388.3    | 0.0192324 |            |            |           |
| 13392   | A_55_P1954706 | Lefty1    | left right determination factor 1                         | NM_010094   | 27.2    | 26.5    | 27.4    | 24.6    | 51.2    | 79.1    | 57.4    | 66.2    | 26.425   | 0.0316777 |            |            |           |
| 72477   | A_55_P2122260 | Tmem87a   | transmembrane protein 87a                                 | NM_028248   | 130.4   | 165.8   | 208.2   | 188     | 420.1   | 452.3   | 396.7   | 413.9   | 178.1    | 0.0205448 |            |            |           |
| 107112  | A_55_P142289  | Tmem14a   | transmembrane protein 14a                                 | NM_029398   | 454.3   | 538     | 490.4   | 569.3   | 1310.6  | 1260.7  | 1151    | 1176.4  | 513      | 1224.675  | 0.0032021  |            |           |
| 13800   | A_55_P124252  | Tmem17    | transmembrane protein 17                                  | NM_029398   | 158.4   | 203.4   | 158.4   | 206.7   | 170     | 445.8   | 431.6   | 396.6   | 205.8    | 150.2875  | 0.0098968  |            |           |
| 43341   | A_55_P1993789 | Hmg2c     | high mobility group domain 2                              | NM_016557   | 1411.9  | 1589.3  | 1495.6  | 1495.1  | 3318.5  | 3990.1  | 3636.2  | 3405.7  | 1497.95  | 0.0012361 |            |            |           |
| 15585   | A_55_P2350372 | Lnc434825 | uncharacterized LOC434825                                 | AI48969     | 141.9   | 120.8   | 135.2   | 164.6   | 36.1    | 308.1   | 370     | 301     | 140.625  | 0.0217167 |            |            |           |
| 122048  | A_55_P217346  | Rax       | BC12-associated X protein                                 | NM_007527   | 1708.1  | 2042.4  | 1820.3  | 1646.3  | 3959.1  | 4960.1  | 4188.1  | 4145.2  | 1804.275 | 0.0070594 |            |            |           |
| 213573  | A_55_P200977  | Rfx2      | RNA domain containing 2                                   | NM_02968070 | 1072.6  | 1042.2  | 1178.9  | 1240.8  | 2658.6  | 2616.6  | 2634.6  | 2830.6  | 1135.025 | 0.0008832 |            |            |           |
| 24044   | A_55_P2052425 | Setd4     | SET domain containing 4                                   | NM_145482   | 693.4   | 683.8   | 714     | 758.6   | 1709.5  | 1802.5  | 1768.3  | 1573.45 | 712.45   | 0.0008212 |            |            |           |
| 39671   | A_55_P305437  | Rcn1      | reticulocalbin 1                                          | NM_009037   | 820.5   | 875.4   | 943.9   | 782.6   | 2093.3  | 2097.1  | 2010.7  | 1026.1  | 855.25   | 0.0059375 |            |            |           |
| 107112  | A_55_P217346  | Rcn1      | reticulocalbin 1                                          | NM_009037   | 379.6   | 483.9   | 427.1   | 460.9   | 1093.6  | 1033.2  | 1004.9  | 1048.4  | 437.875  | 0.0024523 |            |            |           |
| 20293   | A_55_P2017199 | Rfx2      | RNA domain containing protein                             | NM_02968070 | 1228.9  | 1166.3  | 1429.7  | 1429.7  | 385.9   | 355.2   | 295.8   | 398.8   | 150.2875 | 0.0028374 |            |            |           |
| 14828   | A_55_P2076272 | Hsp45     | heat shock protein 5                                      | NM_022310   | 16944.7 | 19316.1 | 17858.7 | 17486.5 | 39753.8 | 47807.7 | 41619   | 41698.9 | 17901.5  | 42719.85  | 0.0013669  |            |           |
| 54324   | A_55_P313157  | Arhgef5   | Rho guanine nucleotide exchange factor 5                  | NM_133674   | 302.6   | 256.9   | 307     | 295.7   | 659.4   | 708.2   | 718     | 678.4   | 290.55   | 691       | 1.25260974 | 0.0027202  |           |
| 56517   | A_55_P407774  | Sic22a1   | solute carrier family 22 (organic anion)                  | NM_019723   | 45.8    | 59.4    | 45.5    | 45.1    | 129.8   | 128     | 109     | 105     | 49.7     | 117.9     | 1.24892917 | 0.0234549  |           |
| 65594   | A_55_P2105257 | Hsp70     | arginine vasopressin-inducible 70 kDa heat shock protein  | NM_007970   | 5048.9  | 4809.7  | 4713.8  | 1142.7  | 12629.3 | 11058   | 11874.1 | 4667.75 | 1179.6   | 1.2378331 | 0.0006738  |            |           |
| 12408   | A_55_P101852  | Ctcf      | carbonic dehydratase-related protein 1                    | NM_007620   | 1581.1  | 1678.8  | 1654    | 1693.6  | 3585.4  | 3660.1  | 4271    | 1028.1  | 1651.875 | 8931.15   | 1.24683176 | 0.00136213 |           |
| 1000461 | A_55_P2151138 | Dynl1e    | dynein light chain Tctex-1                                | NM_00119948 | 6931.2  | 7456.4  | 7568.1  | 6896.1  | 18371.9 | 18381.9 | 14794.5 | 18798.2 | 7077.95  | 16842.85  | 1.2460395  | 0.0007405  |           |
| 233180  | A_55_P102903  | Fez1      | fasciolarin and elongation factor 1                       | NM_183171   | 17.1    | 12      | 16      | 17.8    | 38.8    | 37.7    | 35.7    | 40.6    | 15.725   | 36.62     | 1.24550292 | 0.0006639  |           |
| 64113   | A_55_P215291  | Hsp90     | heat shock protein 90 class B class A domain containing 1 | NM_023242   | 245.2   | 245.2   | 245.2   | 245.2   | 245.2   | 245.2   | 245.2   | 245.2   | 245.2    | 245.2     | 1.2454172  | 0.0007817  |           |
| 106672  | A_55_P112855  | At15182   | expressed sequence tag                                    | NM_00100285 | 838.1   | 870.8   | 855.3   | 975.5   | 2307.3  | 2093.3  | 1774.3  | 2244.4  | 884.925  | 2104.825  | 1.2451301  | 0.0007405  |           |
| 269883  | A_55_P2011061 | Tspan12   | transmembrane protein 12                                  | NM_173007   | 924.4   | 1175.3  | 916.1   | 1061.8  | 2233.4  | 2771.4  | 2078.6  | 2584.1  | 1638.615 | 2416.75   | 1.2437698  | 0.0036415  |           |
| 69234   | A_55_P201966  | Zfp688    | zinc finger protein 688                                   | NM_026999   | 81.4    | 111.8   | 96.3    | 88.1    | 231.4   | 209.5   | 218.1   | 228.5   | 94.4     | 121.9125  | 0.0107847  |            |           |
| 65018   | A_55_P201358  | Fun18b    | functin 18B                                               | NM_029765   | 189.1   | 197.6   | 189.1   | 197.6   | 208.3   | 208.3   | 208.3   | 208.3   | 208.3    | 208.3     | 1.2412326  | 0.0007405  |           |
| 57370   | A_55_P213464  | Adg1      | UDP-Gal-4-epimerase beta 1                                | NM_020579   | 419.7   | 411.9   | 473.3   | 482.8   | 946.2   | 1134.6  | 1091.4  | 11880.0 | 4618.275 | 1092.82   | 1.24028184 | 0.0019617  |           |
| 74766   | A_55_P2170474 | Yfp2      | Yfp1 domain family, member 2                              | NM_138303   | 340.5   | 363.4   | 343.5   | 351.9   | 859     | 833.4   | 793.5   | 819.8   | 349.825  | 826.425   | 1.24012015 | 0.0026205  |           |
| 214885  | A_55_P2036220 | Chad1     | chondroaderin-like                                        | NM_01164320 | 670.4   | 718.9   | 702.2   | 687.5   | 1686.3  | 1668.7  | 1560.2  | 1872.9  | 694.75   | 1646.875  | 1.23961843 | 0.0017607  |           |
| 173095  | A_55_P218532  | Irf7c     | interferon lambda 7 receptor C                            | NM_134159   | 834.4   | 763.6   | 785     | 805.5   | 2089.4  | 1948.5  | 1849.3  | 1644.1  | 797.125  | 1882.825  | 1.2352721  | 0.0043118  |           |
| 22346   | A_55_P101858  | Hsp70     | heat shock protein 70                                     | NM_007970   | 899.2   | 899.2   | 899.2   | 899.2   | 899.2   | 899.2   | 899.2   | 899.2   | 899.2    | 899.2     | 1.23515442 | 0.0008384  |           |
| 216031  | A_55_P117109  | Irfv1     | low-density lipoprotein receptor class B member 1         | NM_173751   | 517.9   | 401.4   | 402.4   | 394.2   | 974.7   | 980.3   | 997.1   | 1178.7  | 440.75   | 1029.25   | 1.2336211  | 0.0016350  |           |
| 216031  | A_55_P117109  | Irfv1     | low-density lipoprotein receptor class B member 1         | NM_173751   | 251.8   | 229.2   | 231.1   | 219.6   | 560.7   | 458.1   | 498.9   | 611.6   | 225.925  | 532.325   | 1.23269227 | 0.0027881  |           |
| 60713   | A_55_P200481  | Tmem97    | transmembrane protein 97                                  | NM_133706   | 111.5   | 109.4   | 99.9    | 104.6   | 247.3   | 251.6   | 271.8   | 312.7   | 106.35   | 249.85    | 1.23119726 | 0.0017472  |           |
| 21452   | A_55_P195095  | Hsp70     | heat shock protein 70                                     | NM_007970   | 52.1    | 52.1    | 52.1    | 52.1    | 52.1    | 52.1    | 52.1    | 52.1    | 52.1     | 52.1      | 1.230114   | 0.0005484  |           |
| 16765   | A_55_P2068663 | Stmn1     | stathmin 1                                                | NM_019641   | 491.2   | 568.6   | 445.3   | 527.9   | 1235.3  | 1264.1  | 1128    | 1080    | 490.25   | 1146.425  | 1.22936108 | 0.0446312  |           |
| 76952   | A_55_P319183  | Ndc5      | 5-nucleotidase, cytosolic II                              | NM_029810   | 82.5    | 113.2   | 91.2    | 103.3   | 235.8   | 224.8   | 241     | 208.1   | 97.55    | 227.425   | 1.22930747 | 0.00161737 |           |
| 216831  | A_55_P193039  | Arhgap44  | Rho GTPase activating protein 44                          | NM_175003   | 745.1   | 613.9   | 748     | 756.5   | 1704.6  | 1702    | 1612.7  | 1666.2  | 715.875  | 1671.375  | 1.22815006 | 0.00210531 |           |
| 70400   | A_55_P2121852 | Arhgap29  | Rho GTPase activating protein 29                          | NM_175003   | 745.1   | 613.9   | 748     | 756.5   | 1704.6  | 1702    | 1612.7  | 1666.2  | 715.875  | 1671.375  | 1.22815006 | 0.00210531 |           |
| 106672  | A_55_P112855  | At15182   | expressed sequence tag                                    | NM_00100285 | 17.9    | 24.2    | 21.2    | 36.6    | 14.7    | 440.6   | 530.2   | 516.2   | 219.125  | 151.425   | 1.2263372  | 0.0031977  |           |
| 13664   | A_55_P112855  | At15182   | expressed sequence tag                                    | NM_00100285 | 1034.5  | 1184.1  | 1044.0  | 1190.8  | 2454.9  | 2727.1  | 2435.9  | 2720.8  | 1108.8   | 2587.175  | 1.2242792  | 0.0002826  |           |
| 65411   | A_55_P214788  | Tfcb      | tubulin folding cofactor III                              | NM_025548   | 891.6   | 904.8   | 934.9   | 855.8   | 2074.3  | 2086.3  | 2348.6  | 1976.3  | 905.775  | 2118.875  | 1.2242400  | 0.0048546  |           |
| 65594   | A_55_P21947   | Ndc90     | NDC90 homolog (yeast)                                     | NM_021246   | 1397.7  | 1365.4  | 1299    | 1399.3  | 2999.3  | 2825.9  | 2218.9  | 2406.5  | 1218.975 | 2352.7075 | 1.22357075 | 0.0007405  |           |
| 74525   | A_55_P260304  | Sic25a46  | solute carrier family 25, member 46                       | NM_026165   | 84.4    | 70.8    | 86.9    | 102.8   | 216.4   | 179     | 184     | 222.9   | 86.225   | 200.575   | 1.2233894  | 0.0057875  |           |
| 66441   | A_55_P123077  | Nubp1     | nucleotide binding protein 1                              | NM_011955   | 701.4   | 699.9   | 690     | 709     | 1719.8  | 1655.4  | 1577.2  | 1588.9  | 700.075  | 1635.325  | 1.2231896  | 0.0036215  |           |
| 67732   | A_55_P207509  | hnh1      | helicase II                                               | NM_026347   | 31.8    | 28      | 27.7    | 28.7    | 76.1    | 70.1    | 72.5    | 54.2    | 29.05    | 68.225    | 1.22204861 | 0.0033823  |           |
| 382118  | A_55_P203427  | Hsp67     | heat shock protein 67                                     | NM_01017705 | 26.3    | 27.4    | 26.3    | 27.4    | 66.8    | 68.8    | 68.8    | 68.8    | 68.8     | 68.8      | 1.2218476  | 0.0009217  |           |
| 18115   | A_55_P214436  | Gis       | ribosomal RNA processing 1                                | NM_010925   | 1000.3  | 933.5   | 993.4   | 1113.3  | 2365.6  | 2244.5  | 2458.9  | 2318.8  | 1201.25  | 95.1      | 1.2214233  | 0.0031677  |           |
| 14854   | A_55_P258860  | Gis       | glutathione synthetase                                    | NM_008180   | 100.2   | 87.8    | 90.2    | 113.3   | 213.2   | 286.2   | 219.3   | 182.8   | 97.875   | 229.225   | 1.22062483 | 0.0005626  |           |
| 11546   | A_55_P227445  | Parp2     | poly (ADP-ribose) polymerase 2                            | NM_009632   | 45.4    | 52.6    | 69.6    | 60.5    | 141.1   | 133.1   | 122.4   | 128.8   | 57.025   | 131.35    | 1.21997489 | 0.0076991  |           |
| 26338   | A_55_P11446   | Hsp70     | heat shock protein 70                                     | NM_007970   | 123.3   | 147.1   | 123.3   | 147.1   | 123.3   | 147.1   | 123.3   | 147.1   | 123.3    | 147.1     | 1.21997489 | 0.0076991  |           |
| 106740  | A_55_P2189571 | LOC106740 | uncharacterized LOC106740                                 | NM_027905   | 2220.8  | 2175.7  | 2622.6  | 2829.6  | 6523.7  | 6589.9  | 5373.8  | 5666    | 2597.175 | 6038.35   | 1.2195515  | 0.0013862  |           |
| 230866  | A_55_P2306537 | C23096C10 | RIKEN cDNA C23096C10 gene                                 | NM_146157   | 118.3   | 183.3   | 177.2   | 170.4   | 434.9   | 390.9   | 426.9   | 429.9   | 180.55   | 419.825   | 1.2174585  | 0.0023699  |           |
| 20448   | A_55_P206529  | Hsp30     | serine/threonine kinase 30                                | NM_011973   | 76.6    | 63.3    | 83.2    | 74      | 172     | 150.9   | 190.3   | 176.7   | 74.275   | 172.475   | 1.21740817 | 0.0025899  |           |
| 58231   | A_55_P217436  | Hsp70     | heat shock protein 70                                     | NM_007970   | 123.3   | 147.1   | 123.3   | 147.1   | 123.3   | 147.1   | 123.3   | 147.1   | 123.3    | 147.1     | 1.2173925  | 0.0009217  |           |
| 26525   | A_55_P1972187 | Sic25a14  | solute carrier family 25 (mitochondrial)                  | NM_011398   | 544.2   | 660.9   | 644.9   | 699.5   | 1564.6  | 1486.2  | 1300.6  | 1490.4  | 637.375  | 1476.1    | 1.2167153  | 0.0031265  |           |
| 387254  | A_55_P111798  | Znf62     | zinc and ring finger 2                                    | NM_199143   | 100.9   | 100.9   | 100.9   | 100.9   | 78.6    | 227.6   | 243.1   | 218.5   | 224.6    | 99.15     | 228.45     | 1.21528205 | 0.0021871 |
| 84217   | A_55_P247870  | Tmem29    | transmembrane protein 29                                  | NM_00116486 | 112.3   | 124.6   | 145.8   | 118.8   | 273.5   | 308.6   | 319     | 312.3   | 125.275  | 360.75    | 1.2151777  | 0.0016987  |           |
| 11777   | A_55_P208837  | Hsp31     | heat shock protein 31                                     | NM_009632   | 84.4    | 75.8    | 75.1    | 86.6    | 160.8   | 165.3   | 169.3   | 162.3   | 74.25    | 102.7     | 1.2151777  | 0.0016987  |           |
| 67397   | A_55_P204938  | Hsp70     | endoplasmic reticulum protein 70                          | NM_026129   | 759.9   | 829.1   | 895.2   | 848.8   | 1775.8  | 1878.1  | 2267.8  | 1805.27 | 830.25   | 19316.35  | 1.2140811  | 0.0008239  |           |
| 13681   | A_55_P2046398 | Elf4a1    | eukaryotic translation initiation factor 4A1              | NM_14495    |         |         |         |         |         |         |         |         |          |           |            |            |           |

|        |               |              |                                                    |                   |         |         |        |        |         |         |         |         |          |            |            |            |            |
|--------|---------------|--------------|----------------------------------------------------|-------------------|---------|---------|--------|--------|---------|---------|---------|---------|----------|------------|------------|------------|------------|
| 320234 | A_52_P562769  | Cdc66        | colicin-rod domain containing                      | NM_177111         | 141     | 130.6   | 147.7  | 318.7  | 290.2   | 345.9   | 345.7   | 145.625 | 325.125  | 1.1597403  | 2.2341707  | 0.0083734  |            |
| 78309  | A_52_P209980  | Cu9          | leucine-rich repeat domain                         | NM_01061335       | 548     | 478.5   | 656.4  | 1342.3 | 1198.5  | 1297.8  | 1297.8  | 158.075 | 1282.65  | 1.15951909 | 2.2328952  | 0.0236178  |            |
| 61768  | A_51_P402227  | h1           | histone H1 protein                                 | NM_00106122       | 31      | 30.5    | 30.5   | 30.5   | 30.5    | 30.5    | 30.5    | 28.3    | 63.6     | 1.15954976 | 2.2340789  | 0.0196832  |            |
| 68777  | A_52_P2024317 | Mtmr53       | transmembrane protein 53                           | NM_026837         | 577     | 822.6   | 725.9  | 696    | 1583.2  | 1521.8  | 1513.5  | 1635.9  | 705.375  | 156.6      | 1.15917185 | 2.2321993  | 0.0279943  |
| 176461 | A_51_P464911  | Mur2         | methionine sulfoxide reductase                     | NM_029619         | 18705.5 | 17474.1 | 1738.2 | 1681.8 | 4213    | 3695.3  | 3702.3  | 4100.6  | 1758.8   | 3927.8     | 1.15768262 | 2.2310198  | 0.0037086  |
| 328801 | A_51_P501542  | Zfp414       | zinc finger protein 414                            | NM_020712         | 440.2   | 408.9   | 411    | 434.4  | 799.9   | 1006.4  | 953.5   | 1032.5  | 432.625  | 948.075    | 1.15604611 | 2.2284862  | 0.0072694  |
| 69848  | A_51_P2131784 | SPOC1        | splicing factor 1                                  | NM_026843         | 648.4   | 648.4   | 648.4  | 648.4  | 648.4   | 648.4   | 648.4   | 648.4   | 648.4    | 151.1      | 1.15513314 | 2.2295622  | 0.0077604  |
| 30934  | A_52_P1972406 | Httb2        | torsin family, member B                            | NM_133673         | 585.5   | 523.6   | 523.2  | 499    | 1270.7  | 1019.8  | 1194    | 1264.3  | 423.625  | 1187.1     | 1.15280678 | 2.2234605  | 0.0112493  |
| 79832  | A_52_P2086094 | Sic35b2      | solute carrier family 3, member 35B                | NM_028662         | 2339.7  | 2435.1  | 2357.6 | 2512.9 | 5579.1  | 4917    | 5618    | 5247.1  | 2229.875 | 5365.325   | 1.15250704 | 2.2229921  | 0.0080071  |
| 53055  | A_52_P219861  | Mett9        | methylenetetrahydrofolate reductase                | NM_021554         | 1488.4  | 1700.1  | 1662   | 1467.6 | 3258.6  | 3854.6  | 3939.6  | 3339.2  | 1579.525 | 3511.5     | 1.15250117 | 2.2228955  | 0.0077697  |
| 635251 | A_52_P173559  | Gm7241       | glycosylated phosphoglycan                         | NM_02000011952    | 71.9    | 83.5    | 78.5   | 81.5   | 164.4   | 172.4   | 172.4   | 197.2   | 178      | 178        | 1.15249172 | 2.2228955  | 0.0077697  |
| 220661 | A_52_P0520088 | Agps         | alkylglycerone phosphate synthase                  | ENSMUST0000011952 | 42.5    | 44.3    | 47.6   | 36.6   | 111.9   | 92.3    | 84.4    | 91.5    | 42.75    | 95.025     | 1.15097719 | 2.2206426  | 0.0386059  |
| 101240 | A_52_P454643  | Ai597468     | expressed sequence A19794                          | NM_001013366      | 933.5   | 760.7   | 923.9  | 858.1  | 1803.9  | 1997.4  | 1927    | 1912.2  | 869.05   | 1924.875   | 1.15088141 | 2.2204513  | 0.0373535  |
| 151391 | A_51_P400773  | Hdgfp2       | hepatoma-derived growth factor                     | NM_008233         | 2210.9  | 1979.1  | 2088.8 | 2039.5 | 4824.4  | 4209.6  | 4638    | 4810.7  | 2079.575 | 4620.675   | 1.15083535 | 2.2204225  | 0.0123217  |
| 74349  | A_52_P208080  | Fam50a2      | family with sequence similarity 50, member 2       | NM_129009         | 1463.2  | 1695.4  | 1652.5 | 1554.5 | 3548.6  | 3439.9  | 3496.1  | 3823.1  | 3592.5   | 3522.425   | 1.15059393 | 2.2196055  | 0.0045857  |
| 109854 | A_51_P050823  | Hmd1         | endonuclease domain containing                     | NM_028013         | 365.1   | 407.1   | 466.6  | 340    | 940     | 895.5   | 883.1   | 905.6   | 411.125  | 905.975    | 1.15013059 | 2.2193405  | 0.0184236  |
| 101240 | A_52_P2046793 | A1300221518k | RIKEN cDNA A1300221518k                            | NM_135131         | 54.7    | 42.8    | 56.9   | 49.9   | 109.6   | 110.9   | 107.2   | 123.7   | 51.075   | 112.85     | 1.14993746 | 2.2190475  | 0.1750571  |
| 98831  | A_52_P2169445 | Mfsd6        | major facilitator superfamily                      | NM_133829         | 913.6   | 1136.9  | 969.6  | 1249.8 | 2417.9  | 2572.9  | 2150.8  | 2269.1  | 1067.475 | 2352.675   | 1.14860119 | 2.2161589  | 0.0398398  |
| 68212  | A_52_P2074695 | Gm7241       | invariant repeat and SOCS box                      | NM_001013366      | 71.9    | 83.5    | 78.5   | 81.5   | 164.4   | 172.4   | 172.4   | 197.2   | 178      | 178        | 1.14858059 | 2.2151551  | 0.0110735  |
| 106489 | A_51_P1974671 | Sfz121       | SFT2 domain containing 1                           | NM_134114         | 64.3    | 75.4    | 90.1   | 76.4   | 174.2   | 174     | 165.2   | 158.3   | 76.55    | 167.925    | 1.14248406 | 2.2076807  | 0.0212084  |
| 101240 | A_66_P119884  | Wdr91        | WD repeat domain 91                                | NM_001013366      | 34.3    | 25.4    | 30.5   | 28.17  | 626.36  | 622.7   | 706.3   | 648.5   | 296.35   | 651.075    | 1.14229924 | 2.2073257  | 0.1664427  |
| 525294 | A_52_P1986989 | Bms11        | breast cancer metastasis-susceptibility protein 11 | NM_001037756      | 2034.4  | 2188.2  | 1935.3 | 2023.7 | 5135.1  | 4374.2  | 4420.3  | 4164.9  | 2045.4   | 4523.625   | 1.14198427 | 2.2068434  | 0.0038391  |
| 313931 | A_52_P2403879 | D2300142428k | RIKEN cDNA D2300142428k                            | NM_140518759      | 44.7    | 34      | 37.8   | 46.9   | 81.4    | 79.3    | 59.7    | 89.5    | 89.425   | 1.14032059 | 2.2067469  | 0.0681351  |            |
| 18164  | A_52_P1950823 | Npc1         | neuronal proliferation, different                  | NM_008721         | 2378.2  | 3186.1  | 3117.9 | 3359.3 | 6304.5  | 6268.6  | 6720    | 7072.8  | 2009     | 6591.475   | 1.14184091 | 2.2066244  | 0.0136623  |
| 146282 | A_51_P460504  | Zcchc14      | zinc finger, CCHC domain                           | NM_080855         | 388.1   | 466.2   | 391.2  | 431.6  | 1082.8  | 868.1   | 845.1   | 897.6   | 417.85   | 923.4      | 1.14163199 | 2.2063602  | 0.0156663  |
| 525294 | A_52_P2077766 | Porcn        | porcupine homology (Drosophila)                    | NM_023638         | 562.5   | 714.4   | 664.4  | 636.5  | 1360.1  | 1438.7  | 1381.6  | 1446.1  | 639.9    | 1406.625   | 1.14098232 | 2.2053129  | 0.0039943  |
| 52521  | A_52_P2122087 | Ubr1         | ubiquitin-protein ligase E3 component 1            | NM_020722         | 147.6   | 168.9   | 161.7  | 161.7  | 378.2   | 378.2   | 378.2   | 378.2   | 378.2    | 349.625    | 1.13979172 | 2.2036329  | 0.0035259  |
| 26921  | A_52_P438876  | Mg4b4        | mitogen-activated protein kinase                   | NM_008596         | 1875.6  | 1806.4  | 1735.6 | 1493.5 | 4054.9  | 3871.1  | 3739.2  | 3242.2  | 1727.75  | 3797.35    | 1.13945851 | 2.2028823  | 0.0066270  |
| 56931  | A_52_P027523  | Anapc7       | anaphase promoting complex                         | NM_019805         | 9.3     | 10.5    | 12.7   | 22.3   | 25.6    | 21.6    | 23.2    | 23.2    | 10.575   | 23.175     | 1.13924238 | 2.2026523  | 0.0310673  |
| 60711  | A_51_P466875  | Sbds         | Shwachman-Bodian-Diamond syndrome                  | NM_023248         | 1887.9  | 2222.2  | 2008   | 2272.5 | 4626.2  | 4725.1  | 4622.8  | 4678.2  | 2097.65  | 4608.075   | 1.13894744 | 2.2022096  | 0.0023874  |
| 66187  | A_52_P1997282 | Fam135a      | family with sequence similarity 135, member A      | NM_008033         | 637.9   | 709.9   | 631.7  | 306.4  | 857.5   | 721.3   | 657.5   | 721.3   | 393.5    | 619.75     | 1.13837769 | 2.2013336  | 0.0053255  |
| 72611  | A_52_P215380  | Pf6a5        | protein phosphatase 65                             | NM_01083858       | 120.1   | 97.7    | 98     | 98     | 226.5   | 226.5   | 199.1   | 101.2   | 227.75   | 222.775    | 1.13633296 | 2.1982156  | 0.0184236  |
| 53418  | A_52_P399990  | B4g4r2       | UDP-Gal:beta-GlcNAc beta 1-4                       | NM_017377         | 111.9   | 110.2   | 116.4  | 102.3  | 220.6   | 258.1   | 243.8   | 245.8   | 110.2    | 242.075    | 1.13457863 | 2.19554427 | 0.018031   |
| 223527 | A_52_P653902  | Emy2         | enhancer of yellow 2 homology                      | NM_175009         | 650.4   | 566.3   | 610.7  | 608.1  | 1419.1  | 1315.2  | 1373.3  | 1239.8  | 608.875  | 1336.85    | 1.13451471 | 2.19544701 | 0.00152472 |
| 54196  | A_52_P2064442 | Pfapn1       | poly(A) binding protein, nuclear                   | NM_019402         | 475.5   | 526.5   | 495.7  | 498.9  | 1197.9  | 1042.13 | 990.26  | 1049.8  | 487.19   | 1070.025   | 1.13376004 | 2.1942988  | 0.0041242  |
| 62424  | A_51_P117957  | Tubb4b       | invariant repeat and SOCS box                      | NM_001013366      | 71.9    | 83.5    | 78.5   | 81.5   | 164.4   | 172.4   | 172.4   | 197.2   | 178      | 178        | 1.13360059 | 2.1942988  | 0.0041242  |
| 24274  | A_52_P244965  | 0730040138k  | RIKEN cDNA D730040138k                             | NM_175518         | 354.2   | 337.5   | 315.5  | 314.2  | 742.9   | 393.5   | 724.5   | 724.5   | 724.5    | 724.5      | 1.13107729 | 2.1902145  | 0.0018751  |
| 142474 | A_52_P1950225 | Fnta         | farnesyltransferase, CaXk                          | NM_008033         | 7725.3  | 7899.7  | 8494.2 | 9304   | 18699   | 18405.7 | 17985.7 | 18290.6 | 8353.3   | 18187.75   | 1.12636099 | 2.1873387  | 0.0030204  |
| 50369  | A_52_P1939784 | Pf6a5        | protein phosphatase 65                             | NM_01083858       | 120.1   | 97.7    | 98     | 98     | 226.5   | 226.5   | 199.1   | 101.2   | 227.75   | 222.775    | 1.12633296 | 2.1872156  | 0.0184236  |
| 73374  | A_51_P351413  | Phospho2     | phosphatase, orphan 2                              | NM_028521         | 143.4   | 154.2   | 131.6  | 309.8  | 253.7   | 286.9   | 386.8   | 138.85  | 304.7    | 1.12489063 | 2.1880851  | 0.0856212  |            |
| 67201  | A_52_P1979252 | Glod4        | glyoxalase domain containing                       | NM_020629         | 1065.6  | 2196.7  | 1936.2 | 2313.8 | 4949.2  | 4486.1  | 4546.9  | 4320.7  | 2103.075 | 4575.725   | 1.12375142 | 2.17912873 | 0.0043688  |
| 74085  | A_52_P2083954 | Sect1        | Sect family domain containing                      | NM_029825         | 146.4   | 134.2   | 125.9  | 137.9  | 296.4   | 300     | 292.4   | 293.4   | 136.1    | 295.55     | 1.12077979 | 2.1744483  | 0.0079614  |
| 86251  | A_52_P194945  | Ncd          | nucleostemin                                       | NM_01061336       | 142.1   | 142.1   | 142.1  | 142.1  | 364.6   | 374.5   | 362.5   | 362.5   | 165      | 352.5      | 1.12062288 | 2.17340829 | 0.0043688  |
| 21971  | A_52_P2152956 | Pf6a5        | protein phosphatase 65                             | NM_01083858       | 166.4   | 162.1   | 165.5  | 223.5  | 402.5   | 377.9   | 393.8   | 367.8   | 179.8    | 385.5      | 1.12037708 | 2.17403798 | 0.0431448  |
| 26562  | A_52_P1998545 | Ncdn         | neurochondrin                                      | NM_011986         | 1654.6  | 1449.9  | 1607.4 | 1466   | 3418    | 3097.2  | 3726.8  | 3200.9  | 1544.475 | 3360.725   | 1.12037049 | 2.17402796 | 0.0047236  |
| 70359  | A_52_P2043212 | 001028060k   | RIKEN cDNA D2043212k                               | AA011582          | 46      | 40      | 42.5   | 50.1   | 91.7    | 100.2   | 100.9   | 88.7    | 44.65    | 96.7       | 1.11816911 | 2.17107137 | 0.00152472 |
| 11739  | A_51_P487813  | Ncd          | nucleostemin                                       | NM_011986         | 148.4   | 148.4   | 148.4  | 148.4  | 364.6   | 374.5   | 362.5   | 362.5   | 165      | 352.5      | 1.1178626  | 2.17040829 | 0.0043688  |
| 210973 | A_52_P1964852 | Kbtbd2       | kelch repeat and BTB (POZ) domain containing 2     | NM_145958         | 3764.3  | 4072.2  | 3691   | 3750.6 | 7797.8  | 8704.1  | 7873.9  | 8807.5  | 3819.525 | 8295.825   | 1.11781252 | 2.17107137 | 0.0014005  |
| 61797  | A_51_P249867  | Srmp4d       | small nuclear ribonucleoprotein                    | NM_026382         | 224     | 191.2   | 206    | 202.8  | 451.1   | 266     | 487.65  | 482.5   | 206      | 447.65     | 1.11700361 | 2.16896205 | 0.00832761 |
| 66450  | A_52_P209577  | Agg1         | aggrecan like 1 with pax                           | NM_025630         | 3862.5  | 5013.9  | 3829.8 | 4452.5 | 10046.3 | 8317.6  | 8888.4  | 9869.7  | 4294.175 | 9290.1     | 1.11684544 | 2.16872246 | 0.03941162 |
| 26529  | A_52_P193899  | Ubr1         | ubiquitin-protein ligase E3 component 1            | NM_020722         | 147.6   | 168.9   | 161.7  | 161.7  | 378.2   | 378.2   | 378.2   | 378.2   | 378.2    | 349.625    | 1.11633296 | 2.16740829 | 0.0035259  |
| 26817  | A_52_P1995165 | Mdc1         | mediator of DNA damage check point                 | NM_001010833      | 195.7   | 160.9   | 155.6  | 217.6  | 405.3   | 388.1   | 371.9   | 404.9   | 182.45   | 368.175    | 1.11633296 | 2.16740829 | 0.0035259  |
| 12569  | A_52_P2171383 | Cdk51        | cyclin-dependent kinase 5, re                      | NM_009871         | 30.9    | 31.4    | 39.8   | 36.8   | 85.7    | 78.3    | 69.9    | 66.9    | 34.725   | 71.1       | 1.11619051 | 2.16737652 | 0.0540199  |
| 67074  | A_52_P446315  | Cdc371       | cell division cycle 37 homology                    | NM_025950         | 1319.6  | 155     |        |        |         |         |         |         |          |            |            |            |            |



|        |              |              |                                    |                   |         |         |         |        |         |         |         |         |          |           |            |            |            |            |
|--------|--------------|--------------|------------------------------------|-------------------|---------|---------|---------|--------|---------|---------|---------|---------|----------|-----------|------------|------------|------------|------------|
| 221005 | _55_12495553 | Zbtb10       | zinc finger and BTB domain         | ENSMUST0000045973 | 123.9   | 105.1   | 127.3   | 107.3  | 256.8   | 20.0    | 267     | 248.0   | 116.4    | 243       | 1.05891921 | 2.08337019 | 0.07780948 |            |
| 322061 | _55_22067878 | Vtprb        | Vpr (Hiv-1) binding protein        | ENSMUST0000045973 | 40.7    | 46.9    | 32.6    | 45.9   | 90.3    | 91.7    | 76.5    | 97.9    | 42.75    | 89.1      | 1.0586432  | 2.08279164 | 0.04201672 |            |
| 212236 | _55_2112628  | PC10022C22BK | RIKEN DNA C10022C22 gene           |                   | 152.7   | 161.4   | 153.2   | 151.2  | 338.5   | 310.8   | 327.7   | 328.7   | 156.2    | 325.5     | 1.0584931  | 2.08270817 | 0.00951044 |            |
| 11984  | _55_21979053 | Atp6vdc      | ATPase, H+ transporting, lysine    | NM_009729         | 2449.1  | 2037.6  | 2082.3  | 1911.5 | 4401.3  | 4326.8  | 4607.4  | 4246.7  | 2119.625 | 4395.55   | 1.05772644 | 2.08164488 | 0.00786591 |            |
| 69223  | _55_22142361 | Rpan9        | RPA interacting protein            | NM_027186         | 99.75   | 121.9   | 123.0   | 121.0  | 237.0   | 253.69  | 254.7   | 221.36  | 116.4375 | 241.88    | 1.05770738 | 2.08162094 | 0.01209527 |            |
| 27973  | _55_2193555  | Worc1        | vitamin K epoxide reductase        | NM_178600         | 1466.1  | 1597.3  | 1304.1  | 1379   | 2730.3  | 3129.4  | 3211.7  | 2880    | 1436.623 | 2987.85   | 1.05751393 | 2.08134184 | 0.01141159 |            |
| 78885  | _55_21321878 | Korc1        | kinase insert region 1-like gene   | NM_027620         | 131.2   | 131.2   | 124.9   | 118.8  | 274.2   | 344.0   | 348.8   | 249.1   | 124.57   | 258.9     | 1.05745771 | 2.07959241 | 0.031129   |            |
| 70265  | _55_22133246 | Cnum3        | CAAX box 5 homolog C (num)         | NM_028375         | 3731    | 3902.4  | 3804.8  | 3766.6 | 7708.7  | 7751.9  | 8217.7  | 7929.6  | 3811.25  | 7903.725  | 1.05759182 | 2.07858827 | 0.00467373 |            |
| 10475  | _55_22594049 | Actr5        | ARPS actin-related protein 5       | NM_175419         | 379.1   | 504.3   | 435.6   | 473.1  | 884.5   | 969.1   | 881.2   | 973.3   | 448.025  | 927.025   | 1.05546298 | 2.07835909 | 0.02639038 |            |
| 79275  | _55_22068564 | Imbr1        | limb region 1-like gene            | NM_029098         | 221.3   | 207.3   | 212.9   | 194.8  | 486.9   | 407.2   | 430.9   | 462.14  | 2090.625 | 1444      | 1.05517322 | 2.07796768 | 0.02012227 |            |
| 544676 | _55_22009062 | UBI105L040Rk | ubiquitin-conjugating enzyme 105L  | NM_01166029       | 12041.7 | 10974.1 | 12334.3 | 12184  | 25023.5 | 22927.7 | 24776.6 | 23873.1 | 11925.1  | 10333.195 | 1.05326053 | 2.07522561 | 0.01589838 |            |
| 78951  | _55_21957168 | Ube2z        | ubiquitin-conjugating enzyme 2     | NM_133777         | 2853.3  | 2674.8  | 3005.3  | 2674.2 | 5742.2  | 5737.2  | 6138    | 602.2   | 2801.9   | 5819.9    | 1.05443087 | 2.07669873 | 0.00284758 |            |
| 68642  | _55_22075288 | Tmem216      | transmembrane protein 216          | NM_026798         | 379.9   | 453.2   | 386.4   | 463.4  | 748     | 864.1   | 876.5   | 1010.2  | 420.75   | 874.75    | 1.05364544 | 2.07676834 | 0.00498851 |            |
| 37980  | _55_21951835 | Tmtc3        | transmembrane and tetraether       | NM_00110013       | 227.1   | 208.0   | 196.9   | 192.2  | 441.2   | 414.1   | 386.6   | 453.2   | 204.25   | 423.775   | 1.05331077 | 2.07528688 | 0.00709595 |            |
| 65407  | _55_22015682 | Alkaf7       | intracellular repair homologue 7   | NM_020569         | 539.5   | 546.8   | 423.4   | 464.8  | 1072.8  | 1072.8  | 1192.5  | 1192.5  | 502.175  | 1033.195  | 1.05326053 | 2.07522561 | 0.01589838 |            |
| 29500  | _55_22064230 | Tmx3         | thioredoxin-related transmembrane  | NM_198295         | 295.9   | 366.1   | 318.2   | 365.9  | 696     | 722.85  | 648.7   | 715.4   | 336.525  | 695.575   | 1.05226414 | 2.07278185 | 0.01289909 |            |
| 57896  | _55_22063466 | Krc1c        | lysine-rich coiled-coil 1          | NM_145568         | 4068.5  | 5061.1  | 4481    | 5151.1 | 10088.9 | 10047.6 | 10476.9 | 9135.6  | 4690.425 | 9689.45   | 1.05202916 | 2.0724441  | 0.01211782 |            |
| 68832  | _55_21492446 | U110057040Rk | RIKEN DNA 110057040 gene           | NM_172401         | 803.9   | 81.5    | 739.4   | 734.1  | 1048.8  | 1617.7  | 1627.9  | 1676.3  | 717.3    | 1602.475  | 1.05179397 | 2.07110605 | 0.02414563 |            |
| 224503 | _55_22002651 | Sncr1        | protein maintenance 7              | NM_027607         | 954.9   | 1092.1  | 1196.1  | 1237.6 | 2228.5  | 2521.4  | 2455.9  | 2050.8  | 1116.325 | 1812.1    | 1.05150297 | 2.07029768 | 0.04279768 |            |
| 101790 | _55_21993504 | Pup1         | PCF and SFRS1 interacting protein  | NM_133948         | 121.8   | 124.8   | 157.7   | 118.7  | 257.5   | 287.4   | 285.4   | 248.4   | 130.75   | 269.675   | 1.05116209 | 2.0721982  | 0.04827846 |            |
| 101933 | _55_2138760  | Abcd4        | AT-binding cassette, sub-family    | NM_008992         | 365.9   | 407.3   | 410.6   | 370.1  | 735.3   | 715.2   | 874.5   | 911.4   | 388.475  | 808.35    | 1.05099205 | 2.0712541  | 0.03006186 |            |
| 107885 | _55_22061319 | Mnhf6        | 15, 10-methylene tetrahydrofolate  | NM_026829         | 60.9    | 57.9    | 72.6    | 71.6   | 128.7   | 133.9   | 144.7   | 146.4   | 65.75    | 135.925   | 1.0509866  | 2.07194628 | 0.03495909 |            |
| 35076  | _55_22009127 | Hist1        | histone H1 nucleosome core         | NM_00205669       | 205.4   | 224.2   | 176.5   | 167.7  | 413.6   | 402.4   | 438.2   | 441     | 202.575  | 441       | 1.0507079  | 2.07189375 | 0.00749798 |            |
| 78975  | _55_22154148 | Arcn9        | aromatase related containing 9     | NM_027456         | 29.1    | 27.9    | 28.7    | 27.6   | 49.9    | 61.3    | 62.3    | 56.6    | 28.325   | 58.675    | 1.04873006 | 2.06989111 | 0.01518885 |            |
| 72752  | _55_21983152 | Grm4d        | GRAM domain containing 4           | NM_172611         | 934.4   | 847.9   | 1006    | 969.9  | 1965.2  | 1965.2  | 2080.6  | 1901.4  | 947.3    | 1955.25   | 1.04755279 | 2.06760074 | 0.00546661 |            |
| 68832  | _55_21492446 | U110057040Rk | PEPTIDOPOLYMERASE (cys)            | NM_026141         | 918.4   | 956.1   | 949.1   | 807.7  | 1906.6  | 1794.9  | 1825.6  | 2006.2  | 913.575  | 1883.825  | 1.04615444 | 2.06508111 | 0.02556205 |            |
| 75291  | _55_21968803 | Tnfr3        | RIKEN DNA and BTB domain           | NM_027620         | 29.1    | 27.9    | 28.7    | 27.6   | 49.9    | 61.3    | 62.3    | 56.6    | 28.325   | 58.675    | 1.04516011 | 2.0637847  | 0.01289909 |            |
| 107642 | _55_22018944 | Sux27        | sorting nexin family member        | NM_00102844       | 223.8   | 225.5   | 232.2   | 229.1  | 519     | 460.3   | 441     | 442.3   | 225.4    | 465.65    | 1.04361523 | 2.06138679 | 0.02522927 |            |
| 11746  | _55_22092859 | Anx4         | anexin A4                          | NM_013471         | 1141.7  | 1164.7  | 1276.7  | 1345   | 2570.1  | 3189.5  | 2534.4  | 2489.7  | 1306.76  | 2696.025  | 1.0430318  | 2.06138679 | 0.02522927 |            |
| 108903 | _55_21932244 | Tbcd         | tubulin-specific chaperone 2       | NM_029878         | 566.5   | 462.7   | 646.6   | 540.7  | 1021.6  | 1170    | 1219.3  | 1133.6  | 554.125  | 1136.075  | 1.04296969 | 2.06046462 | 0.06638578 |            |
| 242023 | _55_21454994 | U110057040Rk | phosphatidylinositol 4-kinase      | NM_00101983       | 3733.2  | 346.2   | 376.5   | 367.6  | 8409.6  | 7726.4  | 8094.8  | 8686.4  | 3802.575 | 7867.5    | 1.04296969 | 2.06046462 | 0.06638578 |            |
| 140260 | _55_2224358  | Ube5         | ubiquitin containing 5             | NM_089552         | 146.9   | 110.3   | 124.8   | 132.8  | 382     | 223     | 253.3   | 291.1   | 127.2    | 262.35    | 1.04253081 | 2.05983771 | 0.01284877 |            |
| 100312 | _55_2223508  | 6720401G13Rk | RIKEN DNA 6720401G13 gene          | NM_026916         | 141.1   | 123.5   | 127.2   | 137.8  | 268.9   | 273     | 270.8   | 275.9   | 132.4    | 272.15    | 1.04161008 | 2.05852379 | 0.0149416  |            |
| 75146  | _55_21945792 | Tmem180      | transmembrane protein 180          | NM_029186         | 79.1    | 77.5    | 76.8    | 74.1   | 150.7   | 143.9   | 176     | 163.8   | 76.875   | 158.6     | 1.04087883 | 2.0574806  | 0.00518468 |            |
| 381510 | _55_22009099 | Dpp4         | epyr-1 like (C. elegans)           | NM_00101201       | 25.2    | 31.2    | 32.2    | 24.4   | 58.6    | 56.7    | 56.5    | 58.9    | 28.25    | 57.675    | 1.04046462 | 2.05688919 | 0.01284877 |            |
| 21464  | _55_21414115 | Sncr1        | incomplete phosphoribosyltran      | NM_027607         | 1019.4  | 1092.1  | 1196.1  | 1237.6 | 2228.5  | 2521.4  | 2455.9  | 2050.8  | 1116.325 | 1812.1    | 1.03942941 | 2.05549808 | 0.04279768 |            |
| 56347  | _55_219807   | Elyf3        | alkaline transcriptional initiator | NM_146200         | 924.15  | 890.59  | 863.7   | 9397   | 18876.5 | 18155.7 | 19017.4 | 18314.2 | 9045.75  | 15885.95  | 1.03937879 | 2.0547754  | 0.00709595 |            |
| 72855  | _55_21984878 | Gm1c1        | germ cell-less homolog 1 (Dros     | NM000000013679    | 27.1    | 26.9    | 25.1    | 23.4   | 48.9    | 54.6    | 48.3    | 59.1    | 25.625   | 52.75     | 1.0385455  | 2.05402744 | 0.01507111 |            |
| 23331  | _55_2198891  | Ptar1        | protein tyrosintransferase alpha   | NM_023208         | 71.1    | 73.7    | 67.9    | 79.6   | 151.9   | 147.4   | 141.9   | 158.4   | 73.075   | 149.25    | 1.03783088 | 2.0531394  | 0.03209293 |            |
| 70721  | _55_2208482  | TR0005813Rk  | RIKEN DNA 170085813 gene           | NM_027607         | 490.2   | 497.4   | 469.4   | 489.9  | 970.3   | 942.8   | 964.8   | 942.8   | 472.8    | 968.075   | 1.03733291 | 2.0530017  | 0.01968568 |            |
| 217370 | _55_22084448 | BC017643     | cDNA sequence BC017643             | NM_144832         | 79.4    | 79.5    | 46.1    | 40.4   | 881.7   | 842.3   | 890.8   | 867.7   | 424.95   | 870.625   | 1.03726385 | 2.0523316  | 0.02551252 |            |
| 49032  | _55_22088499 | Gmpd2        | glucosamine 6-phosphate de         | NM_001038015      | 209.5   | 253.9   | 246.3   | 229.7  | 489.2   | 456.1   | 492.7   | 487.9   | 234.85   | 480.35    | 1.03534668 | 2.05060111 | 0.0073128  |            |
| 319653 | _55_21929490 | S2c2d50      | ucifer carrier family 25, mem      | NM_178766         | 98.8    | 76.7    | 77.6    | 69.1   | 135.4   | 138.6   | 151.6   | 147.7   | 70.35    | 143.325   | 1.03502088 | 2.04911773 | 0.04409592 |            |
| 551217 | _55_21982026 | Ube2d        | ubiquitin homolog B (human)        | NM_00103863       | 480.2   | 497.4   | 469.4   | 489.9  | 970.3   | 942.8   | 964.8   | 942.8   | 472.8    | 968.075   | 1.03467729 | 2.0492272  | 0.01968568 |            |
| 53858  | _55_21971255 | Wdr2b        | RWD domain containing 2B           | NM_029929         | 58.8    | 60.9    | 87.7    | 86.4   | 178.5   | 192     | 171.1   | 193.5   | 89.9     | 183.75    | 1.0339393  | 2.04738081 | 0.00829539 |            |
| 77573  | _55_2192507  | Vps3a        | vacuolar protein sorting 3A        | NM_008929         | 842.6   | 895.5   | 893.2   | 891.4  | 1879.5  | 1732.4  | 1800.8  | 1892.7  | 880.675  | 1808.3    | 1.03372842 | 2.04738081 | 0.00829539 |            |
| 18281  | _55_2173048  | Men1         | multiple endocrine neoplasia       | NM_005853         | 723.4   | 731.8   | 650.8   | 693.6  | 1493.1  | 1253.9  | 1413    | 1527.2  | 696.475  | 1426.3    | 1.0319252  | 2.0439962  | 0.07780948 |            |
| 61736  | _55_2173048  | Men1         | multiple endocrine neoplasia       | NM_005853         | 723.4   | 731.8   | 650.8   | 693.6  | 1493.1  | 1253.9  | 1413    | 1527.2  | 696.475  | 1426.3    | 1.0319252  | 2.0439962  | 0.07780948 |            |
| 11651  | _55_22063684 | Akt1         | thymoma viral proto-oncogene       | NM_009652         | 2602.6  | 2734.4  | 2744.3  | 2922.1 | 5674.1  | 5768    | 5361.9  | 5677.6  | 2751.6   | 5620.4    | 1.03107116 | 2.04354096 | 0.01216269 |            |
| 6086   | _55_22028788 | Slc39a11     | ucifer carrier family 39 (met)     | NM_001166503      | 543.9   | 559.5   | 506.9   | 533.9  | 1191.5  | 1043.7  | 1030    | 1186.9  | 545.05   | 1113.025  | 1.0298187  | 2.04354096 | 0.00898385 |            |
| 63872  | _55_22011026 | Tp53         | zinc finger protein 296            | NM_022409         | 60.6    | 60.6    | 60.8    | 71.4   | 138.5   | 120.4   | 118     | 140     | 63.30    | 129.3     | 1.02874572 | 2.0400799  | 0.01900605 |            |
| 325281 | _55_21954040 | Ube2k        | ubiquitin protein sorting 2        | NM_027607         | 38.6    | 41.6    | 41.6    | 41.6   | 77.6    | 72.6    | 61.2    | 65.6    | 31.25    | 60.25     | 1.0286454  | 2.03983771 | 0.01284877 |            |
| 62676  | _55_21451516 | Hnf1f2       | Rou guanidine nucleotide ex        | NM_028027         | 4102.1  | 4483.1  | 4337.3  | 4878.6 | 9062    | 9495.3  | 8700.5  | 8963    | 4450.25  | 9055.2    | 1.02869983 | 2.0372815  | 0.03495909 |            |
| 1245   | _55_21450518 | Z700029M09Rk | RIKEN DNA Z700029M09 gene          | NM_028299         | 3359.1  | 4083.1  | 3265.5  | 4241.4 | 8001.1  | 7658.1  | 7094.52 | 7531.6  | 3737.275 | 7571      | 1.02675452 | 2.0374324  | 0.00830873 |            |
| 12445  | _55_22047075 | Ccnd3        | cyclin D3                          | NM_001081636      | 2676    | 2443.8  | 2873.6  | 2304   | 4711.6  | 5216.9  | 5382.1  | 5389.8  | 2574.525 | 5224.875  | 1.02522383 | 2.03527994 | 0.01401164 |            |
| 32508  | _55_21973708 | Ube2g        | ubiquitin containing 2             | NM_027607         | 122.7   | 122.7   | 122.7   | 122.7  | 245.4   | 245.4   | 245.4   | 245.4   | 122.7    | 245.4     | 1.02522383 | 2.03527994 | 0.01401164 |            |
| 23999  | _55_2198205  | Plekha8      | pleckstrin homology domain         | NM_001164361      | 45.1    | 49.7    | 42.2    | 30.2   | 97.4    | 84.6    | 94.8    | 92.8    | 108.9    | 47.05     | 95.925     | 1.02463608 | 2.0344613  | 0.02558308 |
| 66044  | _55_22029549 | Dud1         | D-tyrosyl-TRNA deacylase 1         | NM_025314         | 2040.7  | 1929.4  | 2273.1  | 26     |         |         |         |         |          |           |            |            |            |            |

|          |      |          |              |                                   |                     |         |         |         |         |         |         |         |         |            |            |            |            |            |
|----------|------|----------|--------------|-----------------------------------|---------------------|---------|---------|---------|---------|---------|---------|---------|---------|------------|------------|------------|------------|------------|
| 17984    | _S5_ | P1973965 | Ppp1r13b     | protein phosphatase 1, regulatory | 1653.3              | 1397.4  | 1410.8  | 1462.1  | 3099.2  | 2730.6  | 2946.9  | 2872.5  | 2912.3  | 0.97749245 | 1.96904004 | 0.10072298 |            |            |
| 21881    | _S5_ | P451644  | Ndn          | neurodin                          | NM_010882           | 56.5    | 51.4    | 52.1    | 56.8    | 118.5   | 107.4   | 97.4    | 104.1   | 54.2       | 106.85     | 0.97709091 | 1.96849209 | 0.10072298 |
| 30304    | _S5_ | P173591  | Ppa2r2       | zinc finger protein 292           | NM_013899           | 210.2   | 200.2   | 210.2   | 200.2   | 461.9   | 381.5   | 427.1   | 419.2   | 0.97611664 | 1.96716305 | 0.06009895 |            |            |
| 16976    | _S5_ | P513941  | Lypa1        | low density lipoprotein receptor  | NM_013587           | 1715.2  | 1760.1  | 1583.2  | 1521.1  | 3581.9  | 3055.2  | 3370.2  | 2951.3  | 164.9      | 3239.65    | 0.97604599 | 1.96766685 | 0.10192538 |
| 114863   | _S5_ | P188425  | Prosc        | proline synthase co-transmembrane | NM_01039077         | 362     | 344     | 355.2   | 341.5   | 678.9   | 700.4   | 684.2   | 685.2   | 0.97472766 | 1.96527017 | 0.0070891  |            |            |
| 100226   | _S5_ | P252363  | Slx12        | synthase 12                       | NM_133887           | 1658.7  | 1805.8  | 1854    | 2192.1  | 3981.3  | 3488.1  | 3744.4  | 3655.2  | 1898.425   | 3717.25    | 0.97464755 | 1.9651065  | 0.03939757 |
| 12015    | _S5_ | P198223  | Agd4         | hydrolytic agonist of agg         | NC_010475           | 189.2   | 199.2   | 199.2   | 199.2   | 368.9   | 362.8   | 378.3   | 366.4   | 0.97424131 | 1.96459417 | 0.0070891  |            |            |
| 14587    | _S5_ | P284577  | Hyd2         | hydrolase, glucosaminidase 2      | NM_010489           | 3009.2  | 3222.8  | 3394.4  | 3325.7  | 5988.5  | 5880.5  | 6342.8  | 6949.1  | 3188.025   | 6740.765   | 0.97400763 | 1.96428957 | 0.12121001 |
| 9704     | _S5_ | P2185870 | Bc7a         | beta-cytoplasmic class 7A         | NM_029850           | 242.4   | 226.6   | 242.2   | 263.2   | 442.5   | 503.4   | 512.5   | 463.9   | 244.6      | 480.6      | 0.97387682 | 1.96411148 | 0.0067563  |
| 78725    | _S5_ | P244558  | Rab39a2      | RAB3 GTPase activating protein    | NM_01163754         | 1099    | 1074    | 1274.7  | 1212.3  | 2246.4  | 2075.0  | 1962.8  | 2098    | 1066.425   | 2094.425   | 0.97278921 | 1.96263138 | 0.07601216 |
| 320225   | _S5_ | P108581  | Amsa2        | adenosine receptor kinase, beta   | NM_177078           | 210.8   | 212.2   | 249     | 461.3   | 779.2   | 446     | 420.1   | 431     | 225.75     | 430.2      | 0.9725981  | 1.9625981  | 0.0087811  |
| 10041677 | _S5_ | P200872  | Gm13157      | predicted gene 13157              | NM_01127189         | 111.7   | 96.2    | 91.1    | 92.3    | 163.8   | 191     | 206.5   | 207.4   | 97.825     | 192.175    | 0.97200504 | 1.96237471 | 0.10455888 |
| 269593   | _S5_ | P2043987 | Luzp1        | leucine zipper protein 1          | NM_024452           | 1538.3  | 1646    | 1395.8  | 1767.2  | 3245.8  | 3094    | 3053.7  | 3013.2  | 1586.825   | 3101.675   | 0.97176082 | 1.96123284 | 0.01028553 |
| 10138089 | _S5_ | P2010992 | Gm16509      | zinc finger protein 51 pseudo     | ENSMUST00000032133  | 34.4    | 40      | 35.9    | 36.9    | 77.4    | 64.6    | 66.5    | 81.1    | 36.8       | 72.4       | 0.97172769 | 1.9611878  | 0.03888272 |
| 71041    | _S5_ | P142396  | Gdpr3        | glycylglycyl-proline dipeptidase  | NM_029254           | 239.9   | 239.3   | 265.2   | 275.1   | 491.2   | 396.3   | 396.3   | 396.3   | 212.25     | 423.25     | 0.97162402 | 1.96109541 | 0.0070891  |
| 100864   | _S5_ | P1942669 | Pgamt1       | phosphoglycerate mutase 1         | NM_023418           | 1299.1  | 1543.1  | 1285    | 1240.2  | 2485.4  | 2306.3  | 2841.4  | 2855.6  | 1341.85    | 2629       | 0.97062800 | 1.95735758 | 0.0070891  |
| 109785   | _S5_ | P153170  | Cy5d3        | cytochrome B5 reductase 3         | NM_029787           | 868.5   | 827.1   | 953.4   | 813     | 1664.8  | 1913.6  | 1744.9  | 865.5   | 1667.9361  | 1.9553083  | 0.04669617 |            |            |
| 12084    | _S5_ | P207808  | Dsd46        | DEAD (Asp-Glu-Ala) box            | NM_145975           | 1205.1  | 1019.3  | 1117    | 1226.6  | 2158.6  | 2202.9  | 2257.5  | 2290    | 1142       | 2227.25    | 0.96718697 | 1.95495713 | 0.07766356 |
| 67501    | _S5_ | P192143  | Ccar1        | cell cycle associated protein     | NM_009191           | 688.2   | 801.9   | 200.6   | 200.6   | 157.5   | 1375.1  | 1818.4  | 1492.4  | 75.9       | 1406.225   | 0.96155401 | 1.95318027 | 0.0070891  |
| 100957   | _S5_ | P259214  | Sic39a6      | silico carrier family 39 (mem)    | NM_139143           | 213.4   | 201.1   | 182.6   | 207.3   | 356     | 404.5   | 427     | 383.4   | 201.1      | 392.725    | 0.9648058  | 1.95180076 | 0.10443191 |
| 191578   | _S5_ | P2313128 | Helq         | helicase, PQLQ-like               | NM_001081107        | 1668.3  | 174.3   | 159.9   | 191.6   | 377     | 300.9   | 308.4   | 377.2   | 173.525    | 339.75     | 0.96469774 | 1.9510549  | 0.06009247 |
| 27074    | _S5_ | P139400  | Taf1         | TAF1 RNA polymerase I, TAF        | NM_001018008        | 125.7   | 133.9   | 144.6   | 155.5   | 247.2   | 280.3   | 274.8   | 288.3   | 139.925    | 272.65     | 0.96462016 | 1.95154962 | 0.0213142  |
| 105783   | _S5_ | P427896  | Gdpr3        | KDEL (Lys-Asp-Glu) endo           | NM_134090           | 51.1    | 51.1    | 51.1    | 51.1    | 35.8    | 60.9    | 54.8    | 58.6    | 27.25      | 92.25      | 0.96393695 | 1.95097946 | 0.01153777 |
| 226261   | _S5_ | P195960  | Tmem222      | transmembrane protein 222         | NM_025667           | 2049.7  | 1927.9  | 1884.8  | 2101    | 4023.8  | 3744.2  | 3848.6  | 4055    | 2007.125   | 3700.0     | 0.96244522 | 1.94888021 | 0.01153777 |
| 434179   | _S5_ | P235102  | Gm595        | predicted gene 595                | NM_001008427        | 279.6   | 327.8   | 321.4   | 334     | 642.2   | 589.7   | 631     | 615.7   | 616.4      | 0.961998   | 1.9480085  | 0.00655884 |            |
| 217869   | _S5_ | P533034  | Eif5         | eukaryotic translation initiation | NM_173363           | 5228.5  | 5128.5  | 5459.2  | 5139.9  | 10590.0 | 10038.6 | 10663.9 | 956.3   | 5239.9     | 10211.475  | 0.96160987 | 1.94748184 | 0.00229773 |
| 70361    | _S5_ | P10781   | Serpin1      | serpin, alpha-1                   | NM_013899           | 195.3   | 195.3   | 195.3   | 195.3   | 410.1   | 368.3   | 385.6   | 395.6   | 212.25     | 423.25     | 0.961575   | 1.9467646  | 0.0070891  |
| 223723   | _S5_ | P286373  | Thli2        | tubulin tyrosine ligase-like 2    | NM_183017           | 292     | 265.2   | 292.7   | 295.5   | 515     | 525.1   | 630.9   | 495.4   | 277.35     | 541.6      | 0.96120485 | 1.9468377  | 0.03627546 |
| 320244   | _S5_ | P512629  | Thli5        | tubulin tyrosine ligase-like 5    | NM_001081423        | 102.4   | 104.8   | 94.4    | 82.7    | 179.9   | 203.5   | 210.5   | 193.7   | 106.205    | 186.205    | 0.95986439 | 1.94512705 | 0.0900283  |
| 320057   | _S5_ | P2326570 | Ag30057N0181 | RKEN CDNA AG30057N0181            | AK070913            | 60.7    | 56.4    | 48.4    | 60.8    | 112.6   | 100.3   | 112.2   | 113.7   | 56.575     | 109.7      | 0.95951892 | 1.94466133 | 0.03356807 |
| 23984    | _S5_ | P140317  | Ubr1         | ubiquitin-conjugating enzyme      | NM_013899           | 321.6   | 321.6   | 321.6   | 321.6   | 742.2   | 615.6   | 55.7    | 56.7    | 28.2       | 56.2       | 0.95877478 | 1.94427631 | 0.0070891  |
| 80746    | _S5_ | P128586  | Nw2c2        | non-WASP2                         | NM_033650           | 393.6   | 362     | 408.4   | 386.9   | 770.7   | 750.8   | 707.1   | 783.2   | 387.725    | 752.9      | 0.95780739 | 1.94235558 | 0.01363515 |
| 140500   | _S5_ | P2077009 | Acap3        | ARF-GAP with coiled-coil, anky    | NM_207223           | 648.5   | 663.2   | 582.5   | 530.5   | 1266.7  | 1079.7  | 1092.9  | 1069.9  | 580.6      | 1127.3     | 0.95742765 | 1.94184446 | 0.02506255 |
| 64652    | _S5_ | P135543  | Nisch        | nischin                           | NM_022656           | 16096.7 | 17325.9 | 16279.4 | 20063.1 | 32862.8 | 34238.3 | 33531.3 | 34260.7 | 17445.75   | 33723.275  | 0.95631196 | 1.94034337 | 0.01584312 |
| 94210    | _S5_ | P2167451 | Crim2c       | cytrophilin 2                     | NM_033650           | 296.9   | 311.2   | 277.3   | 330.8   | 583.2   | 591.7   | 581.2   | 598.8   | 304.05     | 588.725    | 0.95618488 | 1.94017234 | 0.04883179 |
| 93480    | _S5_ | P209446  | Ccar1        | CytR coenzyme-like protein 1      | NM_009191           | 470.8   | 487.6   | 364.6   | 398.9   | 747.9   | 682.2   | 792.8   | 792.8   | 404.9      | 7824.275   | 0.95607391 | 1.94029505 | 0.0070891  |
| 68240    | _S5_ | P610690  | Rpa3         | replication protein A3            | NM_026632           | 569     | 678.5   | 514.7   | 548.1   | 1041.1  | 1062.3  | 1122.8  | 1146    | 577.937    | 1155.55    | 0.95475311 | 1.94235558 | 0.01363515 |
| 11305    | _S5_ | P248507  | Abca2        | ATP-binding cassette, subfamily   | NM_007379           | 232.4   | 201.7   | 250.6   | 206     | 424.4   | 413.2   | 427.26  | 454.8   | 222.675    | 401.4      | 0.95422676 | 1.93754092 | 0.04122516 |
| 66150    | _S5_ | P2167451 | Hfc1         | ubiquitin-fold modifier, conju    | NM_025388           | 15039.6 | 16588.5 | 16810.9 | 15070.3 | 31224   | 30685.5 | 31028.7 | 29844.4 | 15877.235  | 3808.65    | 0.95278282 | 1.93569794 | 0.02129576 |
| 237400   | _S5_ | P202873  | Ccar1        | CytR coenzyme-like protein 1      | NM_009191           | 470.8   | 487.6   | 364.6   | 398.9   | 747.9   | 682.2   | 792.8   | 792.8   | 404.9      | 7824.275   | 0.95208541 | 1.93518027 | 0.0070891  |
| 7282     | _S5_ | P193735  | H18006ZG17k  | RKEN CDNA H18006ZG17k             | ENSMUST00000029628  | 17.1    | 22.9    | 20      | 21.6    | 37.7    | 44.3    | 37.3    | 38.1    | 20.4       | 39.35      | 0.95261565 | 1.9353788  | 0.0997175  |
| 105787   | _S5_ | P158922  | Pka1a        | protein kinase, AMP-activate      | NM_001013367        | 786.4   | 810.2   | 773.2   | 849.2   | 1477.2  | 1742.4  | 1482    | 1566.6  | 804.75     | 1559.55    | 0.95211327 | 1.93470556 | 0.00834602 |
| 12751    | _S5_ | P198704  | Tp1          | tripeptidyl peptidase I           | NM_009096           | 458.3   | 405.5   | 448.3   | 385     | 793.9   | 800.2   | 832.8   | 849.6   | 424.3      | 819.125    | 0.95209972 | 1.93468398 | 0.00861938 |
| 66300    | _S5_ | P121601  | Serpin1      | transmembrane protein 128         | ENSMUST000000119047 | 231.1   | 231.1   | 231.1   | 231.1   | 454.0   | 417.4   | 346.3   | 311.2   | 212.25     | 423.25     | 0.95190451 | 1.9334958  | 0.01153777 |
| 211286   | _S5_ | P193288  | Cnnt5        | core-oligopus/nucleolin, neu      | NM_001033242        | 1527.6  | 1568.5  | 1456.4  | 1501.4  | 2915.5  | 3069    | 2917.7  | 2966.6  | 1529.55    | 2967.375   | 0.95102591 | 1.93230191 | 0.00629623 |
| 62088    | _S5_ | P2071028 | Gm195        | predicted sequence G195           | XM_883638           | 410.6   | 449.5   | 364.6   | 423.3   | 706.5   | 762.8   | 887.1   | 830.4   | 412        | 796.25     | 0.95021195 | 1.93214659 | 0.03888272 |
| 129896   | _S5_ | P1930217 | Cofl         | cofilin                           | NM_172496           | 122.1   | 136.3   | 150.4   | 152.6   | 290.3   | 262.2   | 260.2   | 268.2   | 140.35     | 270.25     | 0.94943354 | 1.93114428 | 0.02789844 |
| 27027    | _S5_ | P200616  | Hic1         | helicase, sulfurtransferase       | NM_013899           | 261.8   | 261.8   | 261.8   | 261.8   | 515.4   | 515.4   | 515.4   | 515.4   | 515.4      | 515.4      | 0.94877003 | 1.93017286 | 0.02008133 |
| 51810    | _S5_ | P237369  | Hirripa      | heterogeneous nuclear ribon       | NM_016805           | 1474.4  | 1705.9  | 1527.2  | 1700    | 3318.5  | 3024.3  | 2773.8  | 3254    | 1601.875   | 3092.65    | 0.94853144 | 1.92970714 | 0.02244991 |
| 13041    | _S5_ | P2031767 | Ctin         | coactin                           | NM_007803           | 1789.1  | 1970.2  | 1913.6  | 2050.4  | 3620.7  | 3365.5  | 3361.8  | 3361.8  | 439.605    | 3738.3     | 0.94835055 | 1.92966505 | 0.03965999 |
| 67345    | _S5_ | P2005190 | Herc4        | herc domain and Rhd 4             | NM_030114           | 1514.5  | 1700.7  | 1647.8  | 2026.3  | 3281.1  | 3281.1  | 3072.4  | 3600.7  | 1722.2     | 3309.575   | 0.94814653 | 1.92958991 | 0.04846563 |
| 51810    | _S5_ | P2031767 | Ctin         | actin filament group associat     | NM_007803           | 1789.1  | 1970.2  | 1913.6  | 2050.4  | 3620.7  | 3365.5  | 3361.8  | 3361.8  | 439.605    | 3738.3     | 0.94835055 | 1.92966505 | 0.03965999 |
| 97457    | _S5_ | P142396  | He6          | hairly and anchor of split        | NM_019479           | 544.6   | 483.2   | 466.1   | 428     | 1017.3  | 862.5   | 896.8   | 920.2   | 480.6      | 924.2      | 0.94602991 | 1.9264766  | 0.0372097  |
| 19705    | _S5_ | P134007  | Nci          | nucleolin                         | NM_010880           | 5704.4  | 5596.9  | 6472.2  | 6504.2  | 12404.1 | 11088.4 | 11117.8 | 12110.7 | 6071.175   | 11680.25   | 0.94571095 | 1.92613784 | 0.01348856 |
| 75871    | _S5_ | P210893  | Pgd          | phosphatidylinositol glycan       | NM_020035           | 1607.7  | 1359.9  | 1302.2  | 1488.6  | 3064.7  | 2572.6  | 2607.6  | 2830.1  | 1439.6     | 2768.75    | 0.94478566 | 1.92490299 | 0.0477784  |
| 23251    | _S5_ | P193088  | Hic1         | helicase domain 1 (yeast)         | NM_009191           | 470.8   | 487.6   | 364.6   | 398.9   | 747.9   | 682.2   | 792.8   | 792.8   | 404.9      | 7824.275   | 0.94478566 | 1.92490299 | 0.0477784  |
| 71960    | _S5_ | P2090070 | Mylh14       | myosin, heavy polypeptide 1       | NM_028021           | 489.9   | 448.1   | 592.2   | 519.1   | 10574.9 | 8608.2  | 10401.8 | 9211.9  | 5043.9     | 9699.7     | 0.94283837 | 1.92236499 | 0.01783263 |
| 100954   | _S5_ | P195928  | Pfnd4        | prefoldin 4                       | NM_011101512        |         |         |         |         |         |         |         |         |            |            |            |            |            |

|        |               |               |                                                                             |                    |         |         |         |         |          |          |            |            |            |            |            |            |            |            |
|--------|---------------|---------------|-----------------------------------------------------------------------------|--------------------|---------|---------|---------|---------|----------|----------|------------|------------|------------|------------|------------|------------|------------|------------|
| 71069  | A_51_4441970  | Stov2         | storkhead box 2                                                             | NM_175162          | 82.9    | 67.3    | 140.7   | 136.1   | 125.8    | 135.95   | 0.89458274 | 1.85907213 | 0.03275629 |            |            |            |            |            |
| 56447  | A_55_11953485 | Coprl1        | coatomer protein complex, gamma                                             | NM_019817          | 3412.8  | 3177.9  | 3314.8  | 2782.1  | 5890.5   | 5753.4   | 6080.3     | 5797.3     | 3171.9     | 5880.375   | 0.89455071 | 1.85930384 | 0.01760192 |            |
| 56371  | A_55_1212868  | Fluc          | fluorocytosine deaminase                                                    | NM_019157          | 216.7   | 181.6   | 221.7   | 236.1   | 391.7    | 384.1    | 439.1      | 398.45     | 398.45     | 0.89444541 | 1.85890455 | 0.01821317 |            |            |
| 75339  | A_55_22077746 | Mphosph8      | M-phase phosphoprotein 8                                                    | NM_023773          | 1505.6  | 1507.1  | 1548    | 1623.2  | 2811     | 2733.1   | 3026.1     | 2920.2     | 1545.975   | 2872.6     | 0.89344716 | 1.85760739 | 0.03082992 |            |
| 14651  | A_55_22154536 | Hph           | hydroxyglutathione hydrolase                                                | NM_001159626       | 2943    | 2657    | 2780    | 2339    | 4752.1   | 4734.6   | 5353.8     | 5016.9     | 2678.675   | 4964.35    | 0.89336472 | 1.85750323 | 0.04089894 |            |
| 66699  | A_55_22132828 | Cygn1         | crystallin, zeta (quonine reductase)                                        | NM_133679          | 702.4   | 818.7   | 725.6   | 871.2   | 1559.9   | 1350.4   | 1478.4     | 1398.2     | 779.475    | 1444.225   | 0.89328889 | 1.85737986 | 0.04787316 |            |
| 14977  | A_55_1747426  | Nr2f1         | nuclear receptor family 2 (retinoid)                                        | NM_002402          | 963.87  | 982.3   | 985.2   | 1742.6  | 3151.1   | 3151.3   | 3814.6     | 3724.6     | 1755.125   | 0.89277661 | 1.85664848 | 0.03737919 |            |            |
| 60960  | A_55_21130225 | Nr2f2         | nuclear receptor, E1F4 binding protein                                      | NM_026890          | 5211.8  | 5285.8  | 5909.2  | 5972.5  | 10531.3  | 10845.9  | 11753.3    | 10850.5    | 5848       | 10830.75   | 0.89187841 | 1.85559097 | 0.01931214 |            |
| 78084  | A_55_22102050 | C2cd1b        | collyin-coiled and C2 domain containing, isoform 1 (K-specific demethylase) | NM_144787          | 5854.6  | 5498.3  | 6384.4  | 6667.8  | 10772.8  | 11955.8  | 11226.6    | 11199.3    | 6101       | 11288.625  | 0.89077002 | 1.85416655 | 0.02071952 |            |
| 34248  | A_55_22053206 | Kdm4c         | lysine-specific demethylase 4                                               | NM_144787          | 3672    | 386.2   | 373.1   | 360.8   | 756.2    | 644.8    | 692.4      | 667.1      | 371.85     | 690.125    | 0.89001973 | 1.85320147 | 0.00815164 |            |
| 61433  | A_55_22193707 | Pleah3        | pleckstrin homology domain 3                                                | NM_021622          | 883.8   | 85.4    | 85.6    | 85.6    | 178.2    | 149.8    | 162.4      | 162.5      | 86.5       | 158.625    | 0.88974975 | 1.85145277 | 0.02308891 |            |
| 56440  | A_55_2159673  | Sux1          | sirtuin 6                                                                   | NM_019727          | 162.11  | 1787.6  | 1582.4  | 1917.5  | 3166     | 3320.4   | 2940.9     | 3335.2     | 1727.15    | 3190.625   | 0.88978284 | 1.8505163  | 0.03202556 |            |
| 20383  | A_55_22177614 | Srsf3         | serine/arginine-rich splicing factor 3                                      | NM_013663          | 736.9   | 695.5   | 606.2   | 794.6   | 1273.3   | 1234.8   | 1392.2     | 1250.1     | 699.3      | 1287.65    | 0.88862887 | 1.84911012 | 0.04886978 |            |
| 231670 | A_55_2193490  | Pbox21        | I-box protein 21                                                            | NM_145564          | 1248.3  | 1203.4  | 1397.2  | 1301.5  | 2315.2   | 2578.7   | 2320.4     | 2341.9     | 1287.6     | 2378.825   | 0.88674331 | 1.84899759 | 0.00959181 |            |
| 107576 | A_55_22103808 | Plac8         | placental-specific peptidase 8                                              | NM_001032302       | 757.1   | 860.1   | 860.1   | 775.4   | 1391.6   | 1083.9   | 1095.1     | 1095.6     | 850.25     | 1092.375   | 0.88576004 | 1.84810312 | 0.05737919 |            |
| 107576 | A_55_22103808 | Plac8         | zinc finger protein 322A                                                    | NM_172586          | 1127.6  | 1202.8  | 992.4   | 1059.6  | 1835.9   | 1896.3   | 2001.9     | 2104.4     | 1059.6     | 1958.625   | 0.88830361 | 1.8484341  | 0.01254432 |            |
| 107576 | A_55_22103808 | Plac8         | Parkinson disease (autosomal)                                               | NM_016694          | 757.3   | 75.8    | 839.6   | 862.8   | 181.1    | 1394.1   | 1521.3     | 1373.5     | 885.300    | 1847.475   | 0.88530061 | 1.84734487 | 0.03734889 |            |
| 12512  | A_55_22000224 | C63b          | CD33 antigen                                                                | NM_001042580       | 2185.1  | 2865.2  | 2984.9  | 2905.3  | 56078.6  | 56323.25 | 4703.4     | 486.7      | 2819.35    | 52010.875  | 0.88529727 | 1.84714519 | 0.05154989 |            |
| 10621  | A_55_22073496 | Topors        | topoisomerase I binding, arginine-rich                                      | NM_021622          | 526.1   | 662.8   | 566.0   | 601     | 1149.1   | 1028.7   | 1056.1     | 1094.6     | 571.8      | 1092.375   | 0.88517600 | 1.84571001 | 0.05472721 |            |
| 21651  | A_55_2246280  | Fam178a       | family with sequence similar to FHL-1                                       | NM_00181225        | 354.7   | 423     | 364.5   | 388.8   | 690.8    | 719      | 623.6      | 796.4      | 382.75     | 707.45     | 0.88404248 | 1.84553394 | 0.07066491 |            |
| 14651  | A_55_22177173 | Gnl1          | guanine nucleotide binding protein (G-protein)                              | NM_008136          | 2499    | 2416.7  | 2901.7  | 3021.5  | 4765.4   | 4774.1   | 5116.3     | 5274       | 2709.725   | 4982.45    | 0.8831798  | 1.84521616 | 0.05007908 |            |
| 60299  | A_55_21961260 | Vps53         | vacuolar protein sorting 53                                                 | NM_026664          | 56.2    | 56.2    | 55.8    | 61.9    | 104.7    | 116.6    | 101.5      | 101.8      | 57.325     | 100.15     | 0.88283531 | 1.84401901 | 0.01190665 |            |
| 20383  | A_55_2217463  | Npm           | nucleolar protein                                                           | NM_020945          | 9231.5  | 10183.1 | 10539.9 | 11223.7 | 18004.4  | 18828.9  | 18500.4    | 19295.8    | 10349.15   | 19007.35   | 0.88053909 | 1.84100012 | 0.02391337 |            |
| 62859  | A_55_21952788 | Sox2          | Sox DNA binding protein                                                     | ENSMUST00000119368 | 177     | 168.5   | 155.8   | 177.7   | 331.2    | 307.3    | 324.3      | 325.6      | 179.512    | 326.4      | 0.87959152 | 1.84031314 | 0.07725506 |            |
| 13114  | A_55_2114910  | Kmb2          | kyctin B                                                                    | NM_007793          | 453     | 532.9   | 432.9   | 439.6   | 61.6     | 866.6    | 878.2      | 762        | 465.75     | 816.125    | 0.87927666 | 1.83880680 | 0.06765501 |            |
| 77019  | A_55_21998164 | Cntx          | cytotoxic B, Mayven (Drosophila)                                            | NM_178633          | 151.6   | 167.1   | 181     | 175.1   | 340.6    | 319.6    | 264.3      | 324.1      | 169.2      | 312.15     | 0.87972564 | 1.84002353 | 0.02959399 |            |
| 21982  | A_55_22382812 | Timorexin165  | Timorexin-specific chaperone 165                                            | NM_021622          | 377     | 362.9   | 363.1   | 362.9   | 355.5    | 398.7    | 416.4      | 416.4      | 355.5      | 355.5      | 0.87870377 | 1.83783934 | 0.05873237 |            |
| 54004  | A_55_22088640 | Tnt           | thyroid hormone receptor                                                    | NM_019797          | 372     | 372     | 360.4   | 348     | 370.5    | 650.8    | 575.4      | 730.9      | 719.7      | 362.725    | 669.2      | 0.87759667 | 1.83731261 | 0.0487102  |
| 70031  | A_55_21930848 | Cntg8         | CK1-like MARVEL transmembrane protein 8                                     | NM_027294          | 554     | 642.3   | 596.5   | 623.5   | 1041.8   | 1115.2   | 1124       | 1115.2     | 604.3      | 1108.275   | 0.87623402 | 1.83557749 | 0.06100263 |            |
| 11974  | A_55_21938874 | Ap3p2         | ATPase, H+ transporting, lysosomal 2                                        | NM_025272          | 2839    | 3102.8  | 2957.5  | 2571.5  | 4929.8   | 5822     | 5347.8     | 4945.2     | 2867.875   | 5261.2     | 0.87543040 | 1.83455055 | 0.04485456 |            |
| 21452  | A_55_22142825 | Tnfr2         | Tumor necrosis factor receptor 2                                            | NM_020630          | 3916.8  | 4800.5  | 4842.9  | 4352.5  | 7258.4   | 7098.9   | 7016.6     | 7885.5     | 3994.8     | 8074.875   | 0.87480777 | 1.83384754 | 0.01188479 |            |
| 230115 | A_55_22178803 | Atf3          | zinc finger and BTB domain containing                                       | NM_001163284       | 460.9   | 405.5   | 457     | 480.7   | 796.5    | 794.2    | 811.3      | 455.575    | 881.5      | 675.75     | 0.8740198  | 1.83316164 | 0.00782927 |            |
| 207965 | A_55_21971854 | Mett21d       | methyltransferase like 21D                                                  | NM_001033236       | 331.6   | 353.3   | 337.9   | 318     | 552.2    | 614.6    | 679.8      | 616.4      | 335.2      | 615.75     | 0.87446373 | 1.83332631 | 0.02481225 |            |
| 80911  | A_55_22_745   | Acox3         | acyl-Coenzyme A oxidase 3                                                   | NM_030721          | 1019    | 939.2   | 922.2   | 881.9   | 164.1    | 1654.6   | 1799.7     | 1890.2     | 953.075    | 1746.375   | 0.87317007 | 1.83168404 | 0.01901428 |            |
| 10246  | A_55_2190499  | Brd9          | brachyury domain containing 9                                               | NM_001024508       | 319.4   | 365     | 322.6   | 387.6   | 589      | 671.2    | 654.2      | 654.5      | 348.65     | 637.225    | 0.87193011 | 1.83064919 | 0.06540919 |            |
| 21855  | A_55_22172289 | Pomr1b2       | peroxisomal protein of inner mitochondrion 1b2                              | NM_021622          | 5079.2  | 5092.8  | 4928    | 491     | 939.9    | 8683.8   | 8791.9     | 4908.6     | 912.075    | 9121.075   | 0.87137600 | 1.82957100 | 0.07072424 |            |
| 10246  | A_55_21979432 | Pomr1b        | peroxisomal protein of inner mitochondrion 1b                               | NM_011563          | 6658.6  | 6660    | 6749.6  | 13824.2 | 10596.9  | 12954    | 12313.2    | 10510.75   | 12421.925  | 10102.715  | 18386.099  | 0.87052928 | 1.82895929 | 0.05279228 |
| 10246  | A_55_21979432 | Pomr1b        | adenosine monophosphate binding protein 1b                                  | NM_028779          | 375.4   | 302.2   | 380.1   | 326.6   | 654.2    | 650.8    | 758.5      | 638.8      | 344.6      | 630.575    | 0.87044787 | 1.82823027 | 0.07764158 |            |
| 22874  | A_55_2194756  | Ibb           | Ibb domain containing 1                                                     | NM_011664          | 64770.8 | 5769.4  | 72088.8 | 63253.6 | 117910.1 | 111729.7 | 11787.5    | 12386.2    | 6446.15    | 117477.925 | 0.86992818 | 1.82757189 | 0.02167552 |            |
| 230115 | A_55_22107229 | Pipk1         | inositol 1,4,5-trisphosphate 3-kinase                                       | NM_021622          | 277.1   | 241.1   | 241.3   | 247.7   | 380.4    | 426.5    | 496.2      | 424.7      | 251.8      | 458.425    | 0.86978691 | 1.82748879 | 0.04661132 |            |
| 70286  | A_55_2217245  | Tusc3         | tumor suppressor candidate 3                                                | NM_030254          | 183.2   | 179.1   | 187.3   | 210.9   | 382.1    | 341      | 346.8      | 317.8      | 190.125    | 346.925    | 0.86746255 | 1.8245118  | 0.03638263 |            |
| 80205  | A_55_2172688  | Starb1        | STAR3 N-terminal like                                                       | NM_024270          | 510.9   | 518.8   | 499.5   | 505.6   | 945      | 1044.5   | 874.9      | 848        | 507.2      | 928.1      | 0.867145   | 1.82404965 | 0.03214981 |            |
| 10687  | A_55_2199696  | 1110012117Rik | RIKEN DNA 1110012117 gene                                                   | NM_00114098        | 181.4   | 213.1   | 181.4   | 215.1   | 381      | 368.5    | 356.7      | 323.2      | 197.725    | 359.625    | 0.86611081 | 1.82274256 | 0.04586611 |            |
| 72728  | A_55_2198801  | Rtk           | receptor tyrosine kinase                                                    | NM_0178385         | 2469.2  | 2469.2  | 2469.2  | 2469.2  | 4986.6   | 4918.4   | 4618.4     | 4618.4     | 2469.2     | 4618.4     | 0.8657348  | 1.82166384 | 0.03293237 |            |
| 10687  | A_55_22007078 | 181000818Rik  | RIKEN DNA 181000818 gene                                                    | NM_133998          | 227.25  | 213.4   | 272.5   | 261.78  | 4396.6   | 4775.2   | 5120.7     | 4670.3     | 2607.375   | 4740.525   | 0.86504008 | 1.82134481 | 0.01151361 |            |
| 69834  | A_55_209032   | Rab43         | RAB43, small RAS oncogene 43                                                | NM_001039394       | 1246.7  | 1316.8  | 1282.9  | 1253    | 2211.2   | 2509.9   | 2374.4     | 2203.5     | 1274.85    | 2323.25    | 0.86480105 | 1.8210799  | 0.04072288 |            |
| 70497  | A_55_2197091  | Ppp1r11       | protein phosphatase 1, regulatory                                           | NM_029632          | 2657.7  | 2730.8  | 2544.5  | 2808.6  | 4774.1   | 4823     | 5231.1     | 4611.2     | 2682.9     | 4883.575   | 0.86301865 | 1.8184001  | 0.01022486 |            |
| 11280  | A_55_2194934  | Rpl31         | ribosomal protein L31                                                       | NM_021622          | 107.1   | 125.1   | 124.6   | 125.1   | 231.1    | 218      | 218        | 218        | 122.625    | 218        | 0.86281897 | 1.81818182 | 0.01213831 |            |
| 64698  | A_55_22101426 | Mpsr25        | mitochondrial ribosomal protein                                             | NM_025578          | 495.3   | 546.4   | 460.7   | 497.7   | 972.8    | 846.2    | 950.9      | 866.58     | 500.135    | 9090.925   | 0.86224662 | 1.81788964 | 0.02784415 |            |
| 70554  | A_55_22020831 | 2151006016Rik | RIKEN DNA 2151006016 gene                                                   | ENSMUST00000071840 | 2858.3  | 2864.8  | 2688.4  | 2351.3  | 5262.2   | 4781.7   | 4799.2     | 4604.8     | 2681.6     | 4841.975   | 0.85992434 | 1.81494312 | 0.04130042 |            |
| 15441  | A_55_21974326 | Hsp130        | heat shock protein 1, 13 kDa                                                | NM_001122897       | 8865.3  | 10450.3 | 9438.9  | 11063.7 | 19098.5  | 17902.3  | 17290.3    | 17738.8    | 9954.55    | 18006.525  | 0.85946081 | 1.8143714  | 0.04396927 |            |
| 23168  | A_55_22108455 | Ack1          | adenosine kinase 1, cytosolic                                               | NM_0175659         | 107.1   | 125.1   | 124.6   | 125.1   | 231.1    | 218      | 218        | 218        | 122.625    | 218        | 0.85922925 | 1.81427099 | 0.01213831 |            |
| 26882  | A_55_22027496 | Adck5         | aar domain containing kinase 5                                              | NM_172960          | 267.6   | 275.6   | 283.6   | 280.5   | 4899.9   | 5214.6   | 5116       | 4910.6     | 2777.35    | 5032.775   | 0.85762006 | 1.81204739 | 0.03013829 |            |
| 207965 | A_55_21970286 | Med24         | mediator complex subunit 24                                                 | NM_018189          | 1905.3  | 1714.3  | 1743.3  | 1570.3  | 2945.6   | 3186.4   | 3108.2     | 3204.2     | 1733.475   | 3108.1     | 0.8574489  | 1.81183163 | 0.02778833 |            |
| 23989  | A_55_21963864 | Alphaf17      | rho guanine nucleotide exchange factor 17                                   | NM_001811116       | 16848.7 | 15232   | 18205   | 1828    | 3167     | 2844.9   | 3121       | 3295.5     | 1714.25    | 3108.1     | 0.85596789 | 1.80992722 | 0.03819306 |            |
| 65964  | A_55_21532826 | Alphaf17      | rho guanine nucleotide exchange factor 17                                   | NM_001811116       | 16848.7 | 15232   | 18205   | 1828    | 3167     | 2844.9   | 3121       | 3295.5     | 1714.25    | 3108.1     | 0.85596789 | 1.80992722 | 0.03819306 |            |
| 64451  | A_55_21959361 | Dp2a          | DIP2 domain containing protein 2                                            | NM_001081419       | 350.3   | 348.2   | 348.4   | 378.1   | 688.2    |          |            |            |            |            |            |            |            |            |

|         |              |                 |                                               |              |        |        |        |         |         |         |         |          |          |            |            |            |            |            |            |            |
|---------|--------------|-----------------|-----------------------------------------------|--------------|--------|--------|--------|---------|---------|---------|---------|----------|----------|------------|------------|------------|------------|------------|------------|------------|
| 14109   | A5_02202725  | Fau             | Frinkel-Biskis-Relly murine mAb               | NM_001190436 | 673648 | 732091 | 759322 | 1287328 | 1269244 | 1266299 | 1134621 | 70877825 | 1239373  | 0.80648446 | 1.74894445 | 0.02808837 |            |            |            |            |
| 52335   | A5_01219886  | Atxn1l          | ataxin-1 like                                 | NM_001080930 | 98240  | 82097  | 9136   | 8849    | 17109   | 15163   | 15789   | 14867    | 9004     | 157325     | 0.80601002 | 1.74835849 | 0.04570403 |            |            |            |
| 12018   | A5_02101131  | Atxn1           | ataxin-1                                      | NM_001075123 | 97162  | 11376  | 1192   | 1067    | 17438   | 17438   | 17438   | 17438    | 17438    | 1803       | 0.80456401 | 1.74687143 | 0.02956488 |            |            |            |
| 54411   | A5_0447988   | Atfpap1         | ATPase, H transporting, lysosomal             | NM_018794    | 3915   | 3557   | 4264   | 4018    | 7429    | 6588    | 645     | 7032     | 39385    | 687405     | 0.80447113 | 1.74650543 | 0.05480828 |            |            |            |
| 140263  | A5_051982578 | Kdm3a           | lysine (K)-specific demethylase               | NM_173001    | 5482   | 5513   | 626    | 566     | 9969    | 9557    | 944     | 10636    | 56875    | 99005      | 0.80389294 | 1.74580653 | 0.01451556 |            |            |            |
| 74257   | A5_02067451  | Tspan17         | transmembrane protein 17                      | NM_028841    | 4300   | 4254   | 4389   | 4189    | 79338   | 80363   | 77388   | 74866    | 44814    | 77988975   | 0.80381061 | 1.74570706 | 0.06251286 |            |            |            |
| 270201  | A5_05196339  | Atxn1b          | ataxin-1B (Drosophila)                        | NM_0010771   | 5049   | 4233   | 4863   | 4802    | 7823    | 8051    | 823     | 782      | 471      | 782        | 471        | 823        | 0.80376141 | 1.74528388 | 0.05975141 |            |
| 234854  | A5_02928497  | Ckx10           | cyclin dependent kinase 10                    | NM_154446    | 6845   | 6619   | 5899   | 7095    | 12308   | 10982   | 1272    | 1185     | 1181     | 11968      | 0.80338805 | 1.74519476 | 0.01501419 |            |            |            |
| 507485  | A5_02139640  | Fbxo18          | F-box protein 18                              | NM_015792    | 2973   | 3166   | 2733   | 2699    | 4679    | 4916    | 4961    | 5643     | 2897     | 504975     | 0.80332182 | 1.74511665 | 0.02717506 |            |            |            |
| 54846   | A5_02010223  | Gabarp          | gamma-aminobutyric acid receptor, beta        | NM_019749    | 111707 | 9389   | 10294  | 9667    | 18186   | 16205   | 180193  | 181542   | 101303   | 176525     | 0.80307426 | 1.74481233 | 0.07127636 |            |            |            |
| 718534  | A5_029798    | Pitac           | progesterone-inducible transcription factor 1 | NM_029559    | 3072   | 3392   | 3092   | 368     | 595     | 595     | 567     | 309      | 565      | 309        | 565        | 309        | 565        | 0.80297891 | 1.74466017 | 0.03793704 |
| 69171   | A5_0101075   | R181003X1.7k17k | RIKEN cDNA R181003X1.7k17k                    | NM_026977    | 58347  | 5371   | 56342  | 57197   | 101772  | 95711   | 94045   | 102138   | 5641425  | 984165     | 0.80282880 | 1.74445756 | 0.00842178 |            |            |            |
| 179684  | A5_05252625  | Wdr73           | WD repeat domain 73                           | NM_028026    | 10461  | 9999   | 11456  | 11665   | 18235   | 19534   | 1978    | 1827     | 108825   | 189565     | 0.80234651 | 1.74393259 | 0.00352784 |            |            |            |
| 12913   | A5_02135707  | Creb3           | CAMP response element binding protein 3       | NM_013497    | 12327  | 1331   | 13774  | 11876   | 21933   | 2417    | 2222    | 2264     | 13051    | 2274075    | 0.80230243 | 1.74389204 | 0.02103378 |            |            |            |
| 18571   | A5_02134948  | Pitcd9p         | progesterone-inducible transcription factor 9 | NM_02164677  | 11299  | 11299  | 11299  | 11299   | 11299   | 11299   | 11299   | 11299    | 11299    | 11299      | 11299      | 11299      | 11299      | 11299      | 11299      | 11299      |
| 227622  | A5_05220858  | BC029214        | cDNA sequence BC029214                        | NM_153557    | 21336  | 1912   | 19003  | 2041    | 36603   | 38209   | 3300    | 31935    | 199325   | 3480175    | 0.80211243 | 1.74245854 | 0.06546546 |            |            |            |
| 83486   | A5_05234025  | Rbn5            | RNA binding motif protein 5                   | NM_148930    | 5297   | 56872  | 58938  | 60565   | 97333   | 10082   | 102704  | 9823     | 5733625  | 9977175    | 0.80066167 | 1.74189894 | 0.01184195 |            |            |            |
| 26465   | A5_051969530 | Zfp146          | zinc finger protein 146                       | NM_019180    | 1168   | 115    | 986    | 1152    | 2035    | 1735    | 2082    | 191      | 1114     | 19405      | 0.80050819 | 1.74171454 | 0.09449891 |            |            |            |
| 390520  | A5_02006824  | Nup45           | nucleolar protein 45                          | NM_020685    | 20208  | 2116   | 28309  | 29799   | 4088    | 4632    | 4726    | 5042     | 29565    | 4796175    | 0.79926391 | 1.74021889 | 0.02516178 |            |            |            |
| 549741  | A5_05196379  | Bdpl            | B double prime 1, subunit of                  | NM_001081061 | 1442   | 1384   | 1295   | 1247    | 2373    | 2114    | 2467    | 2386     | 1342     | 2335       | 0.79892764 | 1.73980744 | 0.04277672 |            |            |            |
| 71514   | A5_02128451  | Sfpq            | slicing factor polaron/glutamin               | NM_023603    | 1446   | 14306  | 1326   | 16284   | 24415   | 2452    | 2714    | 25059    | 145775   | 252885     | 0.79735846 | 1.73791613 | 0.05125761 |            |            |            |
| 106155  | A5_02166545  | Ogt             | O-linked N-acetylglucosaminase                | NM_139144    | 1721   | 1891   | 2039   | 1856    | 2946    | 3211    | 3494    | 3384     | 187675   | 325875     | 0.79573358 | 1.73599885 | 0.06134342 |            |            |            |
| 26513   | A5_06121339  | Rnc2            | ribonucleoprotein complex 2                   | NM_02038148  | 3167   | 2854   | 2616   | 2973    | 5238    | 5823    | 5623    | 5042     | 29565    | 5115       | 0.79504001 | 1.73556564 | 0.05142338 |            |            |            |
| 6181    | A5_02149683  | Nup10           | NOP1 ribonucleoprotein box                    | NM_025403    | 75077  | 76864  | 79126  | 7816    | 13598   | 126403  | 127756  | 138007   | 760452   | 131941     | 0.79455822 | 1.73454615 | 0.00207217 |            |            |            |
| 20637   | A5_051990573 | Srrp70          | small nuclear ribonucleoprotein               | NM_099224    | 80033  | 90941  | 89239  | 91958   | 151592  | 165258  | 143854  | 164511   | 9001149  | 1653045    | 0.79387693 | 1.73372723 | 0.00161491 |            |            |            |
| 18081   | A5_02142830  | Ninj1           | ninjuria 1                                    | NM_013610    | 40338  | 40895  | 4564   | 38788   | 69657   | 79338   | 7415    | 68699    | 4144025  | 7161225    | 0.79390810 | 1.73302461 | 0.02626881 |            |            |            |
| 72807   | A5_05194289  | Nup94           | ribonucleoprotein 94                          | NM_020684    | 1424   | 1547   | 1444   | 1647    | 2364    | 2465    | 254     | 14655    | 253825   | 48289      | 0.79293491 | 1.72875696 | 0.0274186  |            |            |            |
| 74653   | A5_0496751   | Zfp444A020k     | RIKEN cDNA Zfp444A020k                        | NM_020037    | 397    | 5677   | 3197   | 3363    | 5902    | 641     | 5763    | 6389     | 354292   | 611675     | 0.78860167 | 1.72739599 | 0.08957732 |            |            |            |
| 101358  | A5_05113722  | Fbw14           | F-box and leucine-rich repeat                 | NM_133940    | 798    | 7767   | 8348   | 7048    | 14358   | 13672   | 12941   | 12708    | 779075   | 1344375    | 0.78789383 | 1.72691658 | 0.0448148  |            |            |            |
| 14390   | A5_02152283  | Galpa           | GAP binding protein, alpha                    | NM_008005    | 2052   | 209    | 1973   | 2153    | 3942    | 3318    | 3724    | 2067     | 36775    | 0.78782702 | 1.7264721  | 0.04659910 |            |            |            |            |
| 117173  | A5_02038148  | Nup100          | nucleolar protein 100                         | NM_02038148  | 20208  | 2116   | 28309  | 29799   | 4088    | 4632    | 4726    | 5042     | 29565    | 4796175    | 0.79293491 | 1.74021889 | 0.02516178 |            |            |            |
| 1000322 | A5_0217512   | Gm12751         | predicted gene 12751                          | NM_0142749   | 41667  | 42706  | 45701  | 46291   | 79123   | 78206   | 7959    | 78002    | 4409125  | 76032025   | 0.78621554 | 1.72454472 | 0.01887760 |            |            |            |
| 19941   | A5_052204410 | Rp28            | ribosomal protein L28                         | BC024395     | 322423 | 305891 | 315833 | 32782   | 59567   | 501331  | 567221  | 5281316  | 31878925 | 5480895    | 0.7832902  | 1.72103808 | 0.03407409 |            |            |            |
| 218460  | A5_02193556  | Wdr41           | WD repeat domain 41                           | NM_172590    | 4793   | 474    | 484    | 5054    | 7766    | 8174    | 865     | 8782     | 4851     | 834425     | 0.78122667 | 1.72159151 | 0.01404481 |            |            |            |
| 60995   | A5_05235329  | Rnk2            | RNase kinase 2 (yeast)                        | NM_025934    | 14837  | 16383  | 14762  | 14511   | 27045   | 24701   | 2505    | 27102    | 1512275  | 259745     | 0.78072080 | 1.71989093 | 0.02286241 |            |            |            |
| 64284   | A5_05292739  | Nup45           | nucleolar protein 45                          | NM_020685    | 20208  | 2116   | 28309  | 29799   | 4088    | 4632    | 4726    | 5042     | 29565    | 4796175    | 0.79926391 | 1.74021889 | 0.02516178 |            |            |            |
| 26944   | A5_05218260  | Orax3           | ORAI calcium releaser-activator               | NM_158424    | 21907  | 21343  | 24779  | 23592   | 3888    | 3949    | 4195    | 4750     | 2335     | 400975     | 0.78052486 | 1.71759107 | 0.01648471 |            |            |            |
| 78937   | A5_02148040  | Avr9            | AVR9 homolog (X. cerevisiae)                  | NM_030235    | 149    | 173    | 145    | 1421    | 2797    | 2538    | 2499    | 2612     | 152      | 261075     | 0.78007988 | 1.71722595 | 0.0712921  |            |            |            |
| 74444   | A5_05196028  | Trm80           | transmembrane protein 80                      | NM_027797    | 8948   | 9039   | 9185   | 10569   | 15777   | 16783   | 1615    | 16412    | 950275   | 1628125    | 0.77962724 | 1.71649153 | 0.02765865 |            |            |            |
| 70458   | A5_02149801  | Nup45           | nucleolar protein 45                          | NM_020685    | 20208  | 2116   | 28309  | 29799   | 4088    | 4632    | 4726    | 5042     | 29565    | 4796175    | 0.79926391 | 1.74021889 | 0.02516178 |            |            |            |
| 11771   | A5_05216165  | Ap2a1           | adaptor protein complex AP-2                  | NM_007458    | 18058  | 16296  | 18412  | 18048   | 30884   | 2755    | 29064   | 33948    | 177035   | 3036775    | 0.77578476 | 1.71212111 | 0.0295388  |            |            |            |
| 21498   | A5_05197504  | Arhgef11        | Rho guanine nucleotide exchanger              | NM_01003912  | 171    | 1585   | 1636   | 1613    | 3107    | 3087    | 2593    | 2982     | 1636     | 280825     | 0.77472321 | 1.71092001 | 0.080999   |            |            |            |
| 20170   | A5_05113724  | Hp65            | Hernandez-Pulido syndrome                     | NM_176785    | 9202   | 9194   | 9088   | 871     | 14219   | 15187   | 15839   | 16751    | 90485    | 15499      | 0.77420552 | 1.71074798 | 0.02996293 |            |            |            |
| 14470   | A5_05195222  | Nup100          | ribonucleoprotein 100                         | NM_02038148  | 20208  | 2116   | 28309  | 29799   | 4088    | 4632    | 4726    | 5042     | 29565    | 4796175    | 0.79293491 | 1.74021889 | 0.02516178 |            |            |            |
| 20381   | A5_05210809  | BC030336        | RNA sequence BC030336                         | NM_1164580   | 1442   | 1550   | 1411   | 14831   | 2731    | 2484    | 2419    | 14479    | 1476675  | 2742675    | 0.7734664  | 1.70588226 | 0.02329621 |            |            |            |
| 13244   | A5_05194880  | Dgls1           | Degenerate gene                               | NM_078853    | 19699  | 19495  | 18459  | 17164   | 31545   | 3056    | 3225    | 33367    | 1870425  | 3192175    | 0.77256843 | 1.70838388 | 0.03263704 |            |            |            |
| 20932   | A5_05191536  | Surf4           | surfactant protein 4                          | NM_011512    | 61471  | 63877  | 59923  | 67698   | 114977  | 107931  | 97885   | 110511   | 6305275  | 107769927  | 0.77199927 | 1.70763457 | 0.03162073 |            |            |            |
| 72810   | A5_05192283  | Nup100          | NUP100 homolog (Hs)                           | NM_020685    | 20208  | 2116   | 28309  | 29799   | 4088    | 4632    | 4726    | 5042     | 29565    | 4796175    | 0.79293491 | 1.74021889 | 0.02516178 |            |            |            |
| 72227   | A5_02190634  | B3gap3          | beta-1,3-glucuronidtransferase                | NM_024256    | 1925   | 1973   | 1881   | 1614    | 3012    | 3104    | 2969    | 3193     | 180325   | 307770327  | 0.77052487 | 0.03891262 |            |            |            |            |
| 71725   | A5_052140516 | Px13            | peroxalomal biosynthesis factor               | NM_023651    | 17466  | 20759  | 1885   | 2015    | 30323   | 31925   | 33962   | 33962    | 33962    | 33962      | 33962      | 33962      | 33962      | 33962      | 33962      | 33962      |
| 21905   | A5_05221611  | Np64            | nucleolar protein 64                          | NM_001195023 | 40231  | 39528  | 43887  | 41061   | 77085   | 61038   | 70937   | 74449    | 4117675  | 7035225    | 0.76949553 | 1.70647676 | 0.02738025 |            |            |            |
| 10340   | A5_05219239  | Rp28            | ribosomal protein L28                         | NM_020685    | 20208  | 2116   | 28309  | 29799   | 4088    | 4632    | 4726    | 5042     | 29565    | 4796175    | 0.79293491 | 1.74021889 | 0.02516178 |            |            |            |
| 71764   | A5_05194093  | Pap7            | progestin and aldolQ receptor                 | NM_027956    | 224    | 2028   | 2226   | 2341    | 4048    | 3644    | 340     | 3967     | 220975   | 376525     | 0.76799302 | 1.70289919 | 0.07100365 |            |            |            |
| 12384   | A5_05220966  | Hmnpab          | heterogeneous nuclear ribonucleoprotein       | NM_010448    | 57903  | 56862  | 58466  | 59588   | 104326  | 102504  | 94108   | 9789     | 52808    | 9918175    | 0.76772426 | 1.70263886 | 0.01170901 |            |            |            |
| 75323   | A5_02147860  | At66            | ateryrin repeat and SOCS box                  | NM_0118346   | 6971   | 6882   | 6875   | 6411    | 118346  | 11321   | 11008   | 12078    | 687975   | 1154875    | 0.76612200 | 1.70069215 | 0.02126641 |            |            |            |
| 22764   | A5_05234843  | Nup45           | nucleolar protein 45                          | NM_020685    | 20208  | 2116   | 28309  | 29799   | 4088    | 4632    | 4726    | 5042     | 29565    | 4796175    | 0.79293491 | 1.74021889 | 0.02516178 |            |            |            |
| 107476  | A5_052208476 | Acaca           | acetyl-Coenzyme A carboxylase                 | BC023946     | 13611  | 13808  | 13688  | 11806   | 23021   | 21049   | 21198   | 22911    | 129785   | 2004475    | 0.76582368 | 1.70340525 | 0.04341614 |            |            |            |
| 64934   | A5_051946787 | Ap3n2           | adaptor-related protein complex               | NM_029505    | 599    | 685    | 648    | 655     | 104     | 1079    | 1042    | 124      | 64625    | 110025     | 0.76549928 | 1.69998922 | 0.08278523 |            |            |            |
| 74778   | A5_05195237  | Rp7a            | ribosomal RNA processing 7                    | NM_029101    | 31693  | 29003  | 29166  | 31034   | 53378   | 50154   | 49536   | 5237     | 302235   | 513595     | 0.76535387 | 1.69978688 | 0.01329411 |            |            |            |
| 18099   | A5_05220868  | Nup45           | nucleolar protein 45                          | NM_020685    | 20208  | 2116   | 28309  | 29799   | 4088    | 4632    | 4726    | 5042     | 29565    | 479617     |            |            |            |            |            |            |



|          |               |               |                                                              |         |         |         |         |         |         |         |          |           |           |            |            |           |
|----------|---------------|---------------|--------------------------------------------------------------|---------|---------|---------|---------|---------|---------|---------|----------|-----------|-----------|------------|------------|-----------|
| 18944    | A_52_P587738  | P2y2          | purinergic receptor P2Y, G-protein-coupled, receptor type 12 | 1944.4  | 2288.1  | 1904.3  | 2025.9  | 1210.9  | 1160.5  | 1283.3  | 1077     | 2040.775  | 1182.925  | -0.785962  | -1.724217  | 0.9312017 |
| 69556    | A_51_P317272  | BoD1          | bioactive regulator of chromatin                             | 13608.7 | 16429.1 | 14529.7 | 13832.4 | 8729.7  | 8862.5  | 7916.7  | 8274     | 14599.975 | 8445.725  | -0.7871054 | -1.725687  | 0.9696316 |
| 14514    | A_55_P205170  | PLA2G1B       | platelet-activating factor acyltransferase 1                 | 911.5   | 842.4   | 822.6   | 876.3   | 861.7   | 847.4   | 461     | 513      | 1417      | 801.8     | -0.788886  | -1.727445  | 0.9135262 |
| 21725    | A_55_P2102769 | Abca8a        | ATP-binding cassette, sub-family A, member 8                 | 373.4   | 298.7   | 318     | 348.9   | 197.9   | 189     | 203.7   | 181.6    | 334.75    | 193.05    | -0.7902229 | -1.729314  | 0.9197072 |
| 16829    | A_55_P2066515 | Parg2         | prostaglandin reductase 2                                    | 2005.7  | 2237.5  | 1916.6  | 2059    | 1236    | 1102.9  | 1130.8  | 1283.5   | 2054.92   | 1188.3    | -0.7905197 | -1.729694  | 0.9258492 |
| 61852    | A_55_P2066515 | At13c         | thymine vial-proton-cone                                     | 19325.6 | 20133.1 | 19633.1 | 18732.2 | 11638.8 | 11241.1 | 10440.3 | 11247.6  | 19448.55  | 11141.95  | -0.804312  | -1.746128  | 0.9028315 |
| 15151    | A_51_P241314  | H1h3          | histone H1h3.2                                               | 846.7   | 808.6   | 808.6   | 808.6   | 461.7   | 461.7   | 461.7   | 461.7    | 461.7     | 461.7     | -0.8048726 | -1.7469915 | 0.9209217 |
| 16829    | A_55_P2067200 | Stb2          | STB2, subunit of the oligosaccharyl transferase complex      | 1749.6  | 1815.3  | 2004    | 1731.5  | 928.7   | 1078.5  | 1044.8  | 1145.8   | 1829.65   | 1144.45   | -0.805066  | -1.747272  | 0.9083344 |
| 24480    | A_51_P219444  | Plc2          | phospholipase C-like 2                                       | 5812.2  | 5934.3  | 6834    | 6710.3  | 3517.1  | 3566.4  | 3646.3  | 3270.6   | 6048.7    | 3602.8    | -0.805627  | -1.747695  | 0.9232742 |
| 73961    | A_51_P314262  | 1700052K11R1K | RKEN CDNA 1700052K11 gene                                    | 1043.4  | 986.5   | 1022.9  | 1184.8  | 601.1   | 562.3   | 629.4   | 627.6    | 1059.175  | 668.8     | -0.8062555 | -1.747969  | 0.9413705 |
| 5659     | A_51_P327141  | Scp1          | scavenger class B type 1                                     | 63.6    | 53.6    | 42.6    | 46.8    | 34      | 34      | 34.5    | 36.7     | 61.1      | 60.8      | -0.806312  | -1.751186  | 0.9408126 |
| 107966   | A_51_P169516  | Ppp1r3d       | protein phosphatase 1, regulatory subunit 3                  | 1148.1  | 1251.8  | 1264.6  | 1328.4  | 740.3   | 636.1   | 733.9   | 739.6    | 1248.235  | 712.475   | -0.8091908 | -1.753103  | 0.9421075 |
| 228744   | A_55_P2070721 | Ragp1f        | Rap guanine nucleotide exchange factor 1                     | 1158.3  | 959.2   | 1130.6  | 1027.7  | 596.5   | 627.5   | 662.3   | 643.3    | 1113.95   | 633.575   | -0.8099217 | -1.753163  | 0.9777438 |
| 27801    | A_52_P124371  | Zdhhc8        | zinc finger, DHHC domain containing 8                        | 16506.6 | 1578.7  | 1627.2  | 1683.8  | 884.9   | 880.1   | 954.6   | 1014.3   | 1635.075  | 933.475   | -0.8107053 | -1.754148  | 0.9160128 |
| 107966   | A_55_P210328  | H2h           | H2A histone family, member B                                 | 466.1   | 407.5   | 488.6   | 408.9   | 267.6   | 267.6   | 267.6   | 267.6    | 267.6     | 267.6     | -0.8108808 | -1.755251  | 0.9408936 |
| 18131    | A_51_P220162  | Notch3        | Notch gene homolog 3                                         | 1536.9  | 1529.3  | 1433.5  | 1458.1  | 787.8   | 834.4   | 839.8   | 833.3    | 1446.9    | 823.575   | -0.8107053 | -1.755739  | 0.9160128 |
| 74852    | A_55_P2057777 | Fgf1r         | fibroblast growth factor receptor 1                          | 5011    | 4843.1  | 4993    | 4687.5  | 2598.9  | 2836.7  | 2891.9  | 2852.7   | 4883.65   | 2777.55   | -0.8126613 | -1.758882  | 0.9072587 |
| 11861    | A_55_P2040367 | Boa3          | boott-like 3 (E. coli)                                       | 6438.7  | 7022.2  | 5951.1  | 6268.4  | 3173.5  | 3474    | 3669.8  | 3810.3   | 6465.1    | 3667.9    | -0.814981  | -1.759275  | 0.9308007 |
| 40731    | A_55_P2158524 | Scp1          | scavenger class B type 1                                     | 251.6   | 276.7   | 250.7   | 284     | 143.2   | 149.5   | 158.6   | 156.6    | 273.4     | 146.2     | -0.8213099 | -1.769115  | 0.9231076 |
| 29819    | A_52_P625624  | Stau2         | staufen (RNA binding protein) protein                        | 299.8   | 323.1   | 372.9   | 334.3   | 173.2   | 197.4   | 192.8   | 190.1    | 332.525   | 188.375   | -0.8171222 | -1.761888  | 0.9205191 |
| 69194    | A_51_P134551  | Coq9          | coenzyme Q9 homolog (yeast)                                  | 2235.7  | 2225.2  | 2143.7  | 1893.2  | 1279.5  | 1137.2  | 1119.9  | 1279.9   | 2124.45   | 1204.125  | -0.8187811 | -1.763915  | 0.9592928 |
| 13830    | A_51_P294807  | Stom          | stomatium                                                    | 594.3   | 599.8   | 555.4   | 511.9   | 319.7   | 359.1   | 297     | 306.8    | 565.35    | 320.65    | -0.8190491 | -1.764207  | 0.9698729 |
| 12356    | A_55_P2041961 | Adi3          | adenosyltransferase 3                                        | 251.6   | 276.7   | 250.7   | 284     | 143.2   | 149.5   | 158.6   | 156.6    | 273.4     | 146.2     | -0.8213099 | -1.769115  | 0.9231076 |
| 67460    | A_51_P208555  | Dnecr1        | DNA-dependent cytoskeleton reductase 1                       | 371.1   | 368.8   | 330.7   | 355.1   | 222.1   | 194.7   | 162.5   | 214.8    | 356.35    | 202.025   | -0.8204201 | -1.770259  | 0.9286932 |
| 42231    | A_55_P1977653 | Pal3          | paladin, cytoskeletal associated protein                     | 1263.2  | 826.5   | 898     | 854.2   | 507.6   | 514     | 510.4   | 516.3    | 910.475   | 512.075   | -0.8233367 | -1.769498  | 0.9206616 |
| 748284   | A_55_P2326691 | 9330175M20R1K | RKEN CDNA 9330175M20 gene                                    | 223.7   | 192.4   | 188     | 192.2   | 116.6   | 117.7   | 110.8   | 123.2    | 207.025   | 116.75    | -0.8236743 | -1.769979  | 0.9206616 |
| 57375    | A_55_P1973758 | Apob3         | apolipoprotein B, class III                                  | 208.5   | 205.2   | 203.6   | 203.6   | 146.4   | 146.4   | 146.4   | 146.4    | 146.4     | 146.4     | -0.8236868 | -1.770259  | 0.9286932 |
| 210126   | A_51_P306607  | Ubr1          | ubiquitin domain containing protein 1                        | 2035.3  | 2164.6  | 2241.4  | 2081.5  | 1143.7  | 1275.3  | 1272.3  | 1125.8   | 2130.7    | 1204.275  | -0.8246077 | -1.771054  | 0.9184630 |
| 195046   | A_55_P195598  | Nlrip1a       | NLR family, pyrin domain containing 1                        | 9023.5  | 8184.6  | 8570.2  | 8200.4  | 4852.5  | 5317.8  | 4566.7  | 4819.3   | 8652.175  | 4889.075  | -0.824768  | -1.771202  | 0.9155385 |
| 11532    | A_55_P201842  | Adh5          | alcohol dehydrogenase 5 (class II)                           | 117     | 140     | 131     | 140     | 78.1    | 67.1    | 78.9    | 73.8     | 132.7     | 74.65     | -0.8270359 | -1.774037  | 0.9698072 |
| 15263    | A_55_P2013023 | Prip1         | proline isomerase 1                                          | 466.1   | 407.5   | 488.6   | 408.9   | 267.6   | 267.6   | 267.6   | 267.6    | 267.6     | 267.6     | -0.8270359 | -1.774037  | 0.9698072 |
| 107966   | A_51_P408328  | Hdh1          | HFH, histone H4 domain 1                                     | 151.8   | 172.8   | 165.4   | 145.7   | 160     | 86.7    | 83.9    | 95.6     | 160       | 90        | -0.828842  | -1.776259  | 0.9426894 |
| 105522   | A_65_P18433   | Ankrk22b      | ANKK22, repeat domain 28                                     | 843.7   | 907     | 851.6   | 956     | 559.3   | 466.8   | 489.7   | 489.4    | 889.575   | 501.3     | -0.82892   | -1.776351  | 0.9373681 |
| 1007010  | A_51_P223946  | Ptd5b         | PKS5, regulator of cohesion                                  | 159.3   | 195.2   | 183.8   | 198.6   | 100.7   | 100.2   | 107.5   | 108.2    | 185.6     | 104.15    | -0.829064  | -1.776524  | 0.9695208 |
| 10227    | A_52_P995740  | AD13807       | expressed sequence A13807                                    | 1087.1  | 1065.9  | 1202.8  | 1129    | 637.5   | 545.2   | 701.1   | 645.7    | 1120.8    | 632.375   | -0.829814  | -1.777624  | 0.9308007 |
| 20364    | A_55_P202929  | Scp1          | scavenger class B type 1                                     | 508.2   | 423.6   | 469.6   | 428.8   | 249.4   | 276.7   | 268.7   | 268.7    | 268.7     | 268.7     | -0.830924  | -1.780169  | 0.9426894 |
| 107966   | A_51_P2339540 | Cdkn1c        | cyclin-dependent kinase inhibitor 1                          | 1065.3  | 1066.9  | 1506.9  | 1626    | 831.7   | 844.2   | 1015.1  | 978.6    | 1630.275  | 917.4     | -0.8332057 | -1.781639  | 0.9791942 |
| 105522   | A_55_P2128032 | Hdh1          | heat shock factor 2                                          | 330.9   | 311.7   | 345.7   | 356.9   | 183.4   | 192.4   | 186.8   | 192.2    | 336.8     | 188.7     | -0.8342016 | -1.782870  | 0.9077798 |
| 14220    | A_51_P181573  | Hsp4a         | HSP40, chaperone protein 4                                   | 434     | 95.8    | 1096.1  | 932.6   | 53.1    | 55.8    | 54.4    | 53.7     | 95.3      | 53.9      | -0.8358407 | -1.784898  | 0.9426894 |
| 201251   | A_52_P169091  | Scp1          | scavenger class B type 1                                     | 219.4   | 219.4   | 219.4   | 219.4   | 119.4   | 119.4   | 119.4   | 119.4    | 119.4     | 119.4     | -0.8380832 | -1.785129  | 0.9426894 |
| 11536    | A_51_P436068  | Gpr182        | G-protein-coupled receptor 182                               | 255.6   | 288.1   | 263     | 276.6   | 141.7   | 146     | 165.4   | 152.2    | 270.825   | 151.325   | -0.8406464 | -1.790824  | 0.9205515 |
| 233204   | A_52_P655084  | Tbctd17       | TBC1 domain family, member 17                                | 1173.2  | 1244.9  | 1158.8  | 1158.9  | 698.3   | 766.6   | 682.2   | 1224.125 | 685.375   | 804.906   | -0.8409306 | -1.791201  | 0.9899205 |
| 56280    | A_51_P256304  | Mip37         | mitochondrial ribosomal protein 37                           | 661.5   | 670.7   | 711.1   | 609.6   | 372.7   | 306.0   | 390.4   | 322      | 647.5     | 361.425   | -0.8417063 | -1.792165  | 0.9507998 |
| 49886    | A_55_P1970151 | Scp1          | scavenger class B type 1                                     | 423.6   | 423.6   | 423.6   | 423.6   | 211.8   | 211.8   | 211.8   | 211.8    | 211.8     | 211.8     | -0.8427843 | -1.792165  | 0.9507998 |
| 74838    | A_51_P2118799 | Rprt1         | RMI1, RecA mediated recombination                            | 87.9    | 78.4    | 85      | 88.9    | 50.9    | 43.7    | 42.7    | 52.3     | 85.05     | 47.5      | -0.8489423 | -1.801157  | 0.9629392 |
| 108097   | A_52_P126266  | Pkb2b         | protein kinase, AMP-activated                                | 12658.4 | 10663.6 | 12730.6 | 12620.5 | 6761.6  | 6652.4  | 685.1   | 6605.1   | 12188.125 | 6718.1    | -0.8530499 | -1.806316  | 0.9201524 |
| 14159    | A_52_P635338  | Pes           | peptide sarcosine oxidase                                    | 580.2   | 560.4   | 626     | 555.4   | 298.1   | 343.3   | 343.3   | 292.3    | 580.32    | 321.05    | -0.853324  | -1.806902  | 0.9591009 |
| 11891    | A_55_P218145  | Hdh1          | histone H4 domain 1                                          | 254.1   | 254.1   | 254.1   | 254.1   | 127.05  | 149.7   | 149.7   | 149.7    | 149.7     | 149.7     | -0.853787  | -1.807286  | 0.9591009 |
| 16145    | A_51_P121355  | Gtp           | interferon gamma induced GTPase                              | 884.4   | 922     | 922     | 1011.5  | 509.2   | 514.7   | 522.7   | 517.9    | 935.1     | 516.125   | -0.8557045 | -1.809623  | 0.9655513 |
| 170718   | A_51_P130110  | Ish3b         | inositol 3-OH dehydrogenase 3                                | 20039.9 | 18535.3 | 20012.4 | 18209.5 | 10200.8 | 10911.4 | 11324.9 | 10180.2  | 19199.275 | 10911.4   | -0.857195  | -1.813428  | 0.9125261 |
| 69046    | A_52_P304323  | Iccl1         | iron-sulfur cluster assembly protein 1                       | 2042.9  | 2151    | 2016    | 1980.8  | 1089.1  | 1107.6  | 1110    | 1205.2   | 2047.675  | 1127.975  | -0.8606998 | -1.815191  | 0.9057324 |
| 10042873 | A_55_P205974  | Ppp1r2        | protein phosphatase 1, regulatory subunit 2                  | 541.4   | 597.7   | 586     | 668.4   | 347.5   | 318.2   | 303.6   | 346.1    | 571.3     | 318.2     | -0.861953  | -1.815191  | 0.9057324 |
| 66891    | A_51_P222283  | Hdh1          | malonyl-CoA decarboxylase                                    | 15510.5 | 16733.9 | 15332.5 | 16154.9 | 8157.9  | 8361.2  | 8979.7  | 9513.2   | 15999.82  | 8752.825  | -0.8659785 | -1.822574  | 0.9130672 |
| 245877   | A_55_P1965072 | Mtap7f1       | microtubule-associated protein 7                             | 3024.6  | 2815.3  | 3427.7  | 2750.8  | 14520.3 | 17862.6 | 15771   | 16754.2  | 25992.8   | 16227.025 | -0.8682274 | -1.825418  | 0.9558874 |
| 1650     | A_55_P232031  | Scp1          | scavenger class B type 1                                     | 471.6   | 471.6   | 471.6   | 471.6   | 235.8   | 235.8   | 235.8   | 235.8    | 235.8     | 235.8     | -0.8701436 | -1.825418  | 0.9558874 |
| 415115   | A_51_P418935  | Neur2         | neuronal-like 2 (Drosophila)                                 | 7996.3  | 7196.7  | 7418.2  | 7272.2  | 3962.3  | 3817.8  | 4454.2  | 4128.9   | 7470.85   | 4090.8    | -0.870314  | -1.827727  | 0.9130772 |
| 13849    | A_55_P2002577 | Fhpl1         | epoxide hydrolase 1, microsomal                              | 89.7    | 82.7    | 84.3    | 104.4   | 50.6    | 50.1    | 45.2    | 50.9     | 90.275    | 49.2      | -0.8711603 | -1.829134  | 0.9625418 |
| 27733    | A_52_P121806  | Gm509         | glycerol dehydrogenase 3-phosphate                           | 8240.62 | 71813.8 | 79566.8 | 67998.4 | 38069.3 | 40850.9 | 43159.1 | 42447.8  | 75443.8   | 41131.775 | -0.8725374 | -1.838082  | 0.9346438 |
| 41595    | A_56_P111471  | Scp1          | scavenger class B type 1                                     | 423.6   | 423.6   | 423.6   | 423.6   | 211.8   | 211.8   | 211.8   | 211.8    | 211.8     | 211.8     | -0.874915  | -1.840728  | 0.9426894 |
| 402752   | A_55_P2325970 | C13ORF802R1K  | RKEN CDNA C13ORF802 gene                                     | 251.7   | 283.8   | 281.6   | 272     | 150.8   | 146.2   | 156     | 147.2    | 275.9     | 150.05    | -0.8764549 | -1.835856  | 0.9160128 |
| 18665    | A_65_P03442   | Pgk1          | phosphoglycerate kinase 1                                    | 50126.7 | 46702   | 50864.3 | 45888.5 | 24673.5 | 24905   | 2801.4  | 25701.7  | 48395.375 | 26345.4   | -0.8773351 | -1.837032  | 0.9085024 |
| 39950    | A_55_P2301061 | 9930224M15R1K | RKEN CDNA 9930224M15 gene                                    | 227.8   | 205.5   | 285.4   | 281.1   | 143.3   | 143.3   | 143.3   | 129.6    | 261.2     | 141.05    | -0.8781381 | -1.838082  |           |



|         |               |               |                                             |                    |         |         |         |         |         |        |         |           |           |            |            |            |            |           |
|---------|---------------|---------------|---------------------------------------------|--------------------|---------|---------|---------|---------|---------|--------|---------|-----------|-----------|------------|------------|------------|------------|-----------|
| 72145   | A_52_767271   | Tuba4a        | lethal, alpha 4A                            | NM_009447          | 38986.3 | 44767.9 | 34175.6 | 18074.6 | 12726.4 | 18956  | 19970.5 | 40691.075 | 18569.375 | -1.1258563 | 1.0213103  | 0.0860378  |            |           |
| 67669   | A_51_251717   | Rf6b          | tubulin, alpha 4B                           | NM_026304          | 2454.4  | 2471    | 2464.4  | 2470.7  | 1196.3  | 1058.5 | 1158.5  | 1068.5    | 2465.125  | 1129.775   | -1.1270532 | 1.2184127  | 0.0007438  |           |
| 207181  | A_55_234446   | Rbmb3         | RNA binding motif, single strand            | NM_021713          | 2454.4  | 945.4   | 2471    | 2464.4  | 1015.4  | 371.4  | 487.8   | 487.8     | 424.175   | 1.1282611  | 1.2188373  | 0.0119815  |            |           |
| 66387   | A_51_940388   | Nudrt8        | nucleic (nucleoside diphosphate) synthase   | NM_025529          | 773.8   | 763.7   | 720     | 706.6   | 335.1   | 336.1  | 352.9   | 329.6     | 741.025   | 388.425    | -1.1300999 | 1.2187389  | 0.0049171  |           |
| 214281  | A_51_9433870  | Vegfc         | vascular endothelial growth factor          | NM_009506          | 194     | 256.8   | 200     | 214.7   | 95.8    | 102.7  | 90.6    | 104.5     | 216.375   | 138.425    | -1.1303511 | 1.2189120  | 0.0201438  |           |
| 211623  | A_55_21966332 | Plac9         | placenta specific 9                         | NM_207229          | 1291.8  | 1249    | 1138.5  | 918.5   | 486.4   | 588.6  | 538     | 474       | 1149.45   | 521.175    | -1.134362  | 1.2192146  | 0.04899129 |           |
| 101466  | A_51_970721   | Plc1          | 5-phospholipase domain containing 1         | NM_075311          | 1006.2  | 1037.4  | 996.3   | 1017.4  | 437.9   | 418.1  | 486.1   | 486.1     | 977.125   | 448.75     | -1.1349556 | 1.2193544  | 0.0247546  |           |
| 21883   | A_55_2702426  | Glyp4         | discs, large homo-associated                | NM_146128          | 3420.9  | 2704.3  | 3647.9  | 2989.2  | 1346.1  | 1347.8 | 1630.8  | 1474      | 3149.575  | 1447.175   | -1.1353923 | 1.2196729  | 0.0413049  |           |
| 219611  | A_55_21968544 | Glyp3         | RKEN CDNA 6330549D23 gene                   | NM_003619          | 53.3    | 65.5    | 58.9    | 72.1    | 26.1    | 26.8   | 27.7    | 32.8      | 62.45     | 28.35      | -1.1360082 | 1.2197209  | 0.0472760  |           |
| 21424   | A_55_2206929  | Parp6         | poly(ADP-ribose) polymerase 6               | NM_177460          | 145.9   | 154.7   | 132.4   | 146.6   | 76.2    | 76.2   | 55.9    | 70.7      | 63.5      | 144.65     | 66.075     | -1.1363204 | 1.2198196  | 0.0202998 |
| 663317  | A_55_2128208  | Ptdc12        | RKEN CDS 2.5 subfamily                      | NM_00145512        | 443.2   | 361.7   | 347.1   | 352.1   | 154.8   | 154.8  | 156.7   | 156.7     | 319.4     | 156.7      | -1.1364487 | 1.2198379  | 0.0214325  |           |
| 74013   | A_51_9245631  | Rh2d          | ratfin family member 2                      | NM_028713          | 205.6   | 238     | 193.6   | 232     | 85.4    | 97.3   | 101.9   | 110.3     | 217.3     | 98.725     | -1.1391458 | 1.2205118  | 0.0217088  |           |
| 12362   | A_55_2199044  | Casp1         | caspace 1                                   | NM_009807          | 174.7   | 156.1   | 161.3   | 150.5   | 71.2    | 76.9   | 83.3    | 61.6      | 160.65    | 73.25      | -1.1396162 | 1.2203224  | 0.0200745  |           |
| 92224   | A_55_2473229  | Zfpb7b        | zinc finger and BTB domain                  | NM_009565          | 371.7   | 343.3   | 377.8   | 361.9   | 173.2   | 151.2  | 170.2   | 166       | 363.675   | 165.15     | -1.1398787 | 1.2203623  | 0.0105229  |           |
| 23950   | A_55_2201358  | Snop6         | DnaI topoisomerase 3, isoform 2             | NM_02153940        | 1000.2  | 1039.6  | 1117.4  | 1192.8  | 433.8   | 468.3  | 518.8   | 518.8     | 1086.5    | 495.25     | -1.1404621 | 1.2204083  | 0.0219566  |           |
| 7979    | A_51_9154961  | Tjapap        | TCD-inducible poly(ADP-ribose) synthetase 1 | NM_178892          | 2093.5  | 2284.2  | 1991    | 1849.2  | 920.9   | 964.3  | 873.1   | 961.9     | 2054.475  | 930.05     | -1.1402881 | 1.2204204  | 0.0333412  |           |
| 52388   | A_66_118153   | 11-Spe        | heg11                                       | NM_01009818        | 4552.3  | 4404.6  | 4141.3  | 4504.2  | 1973.1  | 2315.8 | 1774.2  | 1951.6    | 4400.6    | 2003.675   | -1.1407901 | 1.2205015  | 0.0072156  |           |
| 76869   | A_55_2111522  | Hglt1b        | Hglt1 domain family, member                 | NM_080846          | 1138.2  | 1115.3  | 1074.9  | 1047.5  | 573.8   | 518.3  | 492.8   | 439.4     | 1093.975  | 497.075    | -1.141442  | 1.2209913  | 0.0262895  |           |
| 21950   | A_55_2171682  | Ube2n         | ubiquitin-conjugating enzyme                | NM_080560          | 2439.2  | 2467    | 2333.2  | 2514.1  | 1187.9  | 1089.9 | 1061.8  | 1082.5    | 2438.375  | 1105.525   | -1.1420074 | 1.2206788  | 0.0056712  |           |
| 11312   | A_55_2197743  | Dab2          | disabled homologue 2 (Drosophila)           | NM_023118          | 928     | 812.1   | 831.7   | 860.3   | 437     | 426.8  | 318.2   | 388.1     | 846.175   | 385.7      | -1.1428927 | 1.2208334  | 0.0382737  |           |
| 19094   | A_52_2186489  | Mapk11        | mitogen-activated protein kinase 11         | NM_011611          | 62      | 56.9    | 58.6    | 45.9    | 24.4    | 27.5   | 27.3    | 21.7      | 55.85     | 25.225     | -1.1442957 | 1.2210382  | 0.0597744  |           |
| 26893   | A_55_2192594  | Dnq1          | calcium homeostasis modulator 1             | NM_023546          | 117     | 103.5   | 126.5   | 137.4   | 45.4    | 45.4   | 57.5    | 64.5      | 110.675   | 55.225     | -1.1446466 | 1.2210627  | 0.0279635  |           |
| 21846   | A_51_917171   | Tiet1         | tyrosinase with inactivated                 | NM_015157          | 205.2   | 234     | 226.8   | 228.3   | 87.9    | 107    | 115.5   | 146.7     | 223.775   | 101.45     | -1.1467031 | 1.2214079  | 0.0137855  |           |
| 11896   | A_55_2198240  | kam2          | intracellular adhesion molecule             | NM_010494          | 2514.2  | 2486.4  | 2456.5  | 2942.2  | 1224.2  | 1437.1 | 1257.7  | 1381.6    | 2947.375  | 1342.47    | -1.1477032 | 1.2215688  | 0.0259967  |           |
| 15479   | A_55_2193789  | Acv1b         | Activin A receptor, type 1B                 | ENSMUST0000000544  | 1782.8  | 1565.4  | 1749.7  | 1499.7  | 696.5   | 772.4  | 679.8   | 829.1     | 1649.4    | 74.75      | -1.1485105 | 1.2216849  | 0.0090570  |           |
| 26464   | A_55_2222250  | Rhb           | filaggrin, beta                             | NM_020521          | 262     | 253.1   | 243.2   | 259.2   | 102.4   | 115.7  | 115.7   | 129.2     | 259.2     | 102.4      | -1.1504688 | 1.2219867  | 0.0219867  |           |
| 29856   | A_55_2206524  | Sntn1         | smoothelin                                  | NM_01159284        | 7758.4  | 7753.9  | 7834.4  | 7739.3  | 3388.2  | 3609.9 | 3380.1  | 3620.2    | 7771.5    | 3499.6     | -1.1517735 | 1.2218688  | 0.0025541  |           |
| 107328  | A_55_21960641 | Tyrt1         | RNAi phosphatidyltransferase 1              | NM_153597          | 2367.3  | 2670.1  | 2354.3  | 2483.7  | 1107.3  | 1083.4 | 1133.2  | 1268.8    | 1109.475  | 1152.296   | -1.1522926 | 1.2222662  | 0.0005514  |           |
| 72764   | A_55_2207208  | Tp142         | zinc finger protein 142                     | NM_029888          | 279.4   | 349.6   | 294.9   | 393.3   | 160.6   | 145    | 128     | 154.8     | 329.3     | 147.1      | -1.1545458 | 1.22260018 | 0.00808195 |           |
| 22370   | A_55_2191864  | Rim3          | cellular inositol trisphosphate             | NM_091167          | 911.6   | 808.7   | 808.7   | 808.7   | 388.3   | 406.8  | 406.8   | 406.8     | 808.7     | 406.8      | -1.1546263 | 1.2227879  | 0.0092878  |           |
| 213493  | A_55_2211629  | Dnq1d22e      | DNA segment, Chr 4, ERATO                   | NM_001025608       | 1162.5  | 1498    | 1115.2  | 1195.3  | 680     | 646.5  | 551.4   | 547       | 1242.75   | 556.8      | -1.1547881 | 1.2229129  | 0.0642888  |           |
| 259097  | A_55_22169039 | Olfir5f58     | olfactory receptor 58                       | NM_147093          | 171.6   | 167.3   | 171.9   | 190.5   | 67      | 91.1   | 74.6    | 81.6      | 175.325   | 79.075     | -1.1574682 | 1.2230665  | 0.0215643  |           |
| 72017   | A_51_9438527  | Cy5d1         | cytochrome b5 oxidase 1                     | NM_028057          | 3496    | 3287.5  | 3395.9  | 3232.2  | 1525.1  | 1519.4 | 1614.2  | 1357.2    | 3352.9    | 1503.975   | -1.1578781 | 1.2232964  | 0.0032418  |           |
| 71207   | A_55_2209739  | Nudrt4        | nucleic (nucleoside diphosphate) synthase 4 | NM_027722          | 3049.7  | 3181    | 3344.1  | 3374.8  | 1618.8  | 1500.9 | 1286.8  | 1530.6    | 3348.55   | 1499.275   | -1.1606214 | 1.2235747  | 0.0123548  |           |
| 41906   | A_55_2213851  | Rh3c          | OC43 domain containing 2                    | NM_020982          | 119.4   | 103.6   | 109.8   | 117.9   | 42.4    | 45.4   | 49.4    | 41.4      | 110.675   | 49.4       | -1.1607487 | 1.2236879  | 0.0214325  |           |
| 21106   | A_55_2207324  | Nudb          | hydroxyacyl-Coenzyme A dehydrogenase        | NM_145558          | 2116.6  | 2248.1  | 1958.0  | 2453.3  | 1035.46 | 997.71 | 911.78  | 969.92    | 2194.825  | 997.875    | -1.161878  | 1.2237409  | 0.0443764  |           |
| 60345   | A_55_22161702 | Nrip2         | nuclear receptor interacting protein 2      | NM_021717          | 80.6    | 79.9    | 111.9   | 94.3    | 37.6    | 41.7   | 44.4    | 38.9      | 91.675    | 40.65      | -1.1621315 | 1.2238314  | 0.0542639  |           |
| 1004087 | A_55_21964902 | cm014         | predicted gene 3014                         | ENSMUST00000110280 | 250.1   | 296.5   | 238.7   | 348.4   | 133     | 114    | 115.8   | 119       | 283.425   | 125.45     | -1.1625561 | 1.2239630  | 0.0240566  |           |
| 11831   | A_51_944370   | Ube2a         | ubiquitin elongation factor                 | NM_007926          | 548.6   | 529.3   | 548.6   | 507.9   | 256.4   | 256.4  | 256.4   | 256.4     | 548.6     | 256.4      | -1.1626421 | 1.2240841  | 0.0154432  |           |
| 74630   | A_55_2243118  | Hs1           | intersectin 1 (SH3 domain)                  | NM_01110275        | 1862.7  | 1641.1  | 1881.6  | 2236.5  | 791.9   | 856.8  | 864.9   | 874.8     | 1906.725  | 847.1      | -1.1628998 | 1.2239702  | 0.0175049  |           |
| 12630   | A_51_913032   | Hspa12b       | heat shock protein 12B                      | NM_028306          | 882.7   | 1014.1  | 876.7   | 957.7   | 368     | 428.8  | 396.9   | 454.5     | 932.8     | 481.3      | -1.1642311 | 1.2241374  | 0.0202928  |           |
| 12958   | A_55_21983314 | Gat1          | carbamate acetyltransferase                 | NM_007760          | 176.7   | 128.9   | 171.6   | 153.6   | 68.8    | 62.9   | 62.2    | 81.7      | 155.475   | 49.6       | -1.1653311 | 1.2242848  | 0.0131952  |           |
| 16771   | A_56_2101600  | Lamb1         | lamb1                                       | NM_008482          | 381.4   | 381.4   | 381.4   | 381.4   | 147.2   | 180.5  | 175.4   | 175.4     | 381.4     | 180.5      | -1.1654666 | 1.2243263  | 0.0159774  |           |
| 14905   | A_51_9464300  | Cd5f1         | growth differentiation factor               | NM_008107          | 5717.1  | 4818.8  | 6295.5  | 5379.8  | 2281.7  | 2265.4 | 2381.5  | 3006.5    | 5578.2625 | 2483.775   | -1.1657722 | 1.2243566  | 0.0497565  |           |
| 76790   | A_51_9130079  | Ump           | lymphoid-restricted membrane protein        | NM_008511          | 48.2    | 48.2    | 51.7    | 42.8    | 21.2    | 25.6   | 21.1    | 17.9      | 47.875    | 21.1       | -1.1665697 | 1.2244732  | 0.0300267  |           |
| 14914   | A_55_2198064  | cm011         | RKEN CDNA 1110005A03 gene                   | NM_028885          | 3714.6  | 3856.7  | 4412.1  | 4477.5  | 1720.9  | 1825.4 | 1927.4  | 1838.5    | 4115.225  | 1828.05    | -1.1670429 | 1.2245096  | 0.0049203  |           |
| 5644    | A_55_2198566  | Ube2c         | cellular ubiquitin-conjugating factor 1     | NM_039117          | 8540.6  | 8778.1  | 8778.1  | 8778.1  | 4407.3  | 3823.7 | 3992.4  | 3879.1    | 8958.9    | 4407.3     | -1.1673833 | 1.2246339  | 0.0091542  |           |
| 67974   | A_55_2207789  | LOC676974     | glucose-6-phosphate isomerase               | NM_01013154        | 15076.6 | 14360.1 | 13084.2 | 15703.9 | 6672.4  | 6904.0 | 6440.8  | 6648.8    | 14554.7   | 6461.1     | -1.1688468 | 1.2248319  | 0.0168305  |           |
| 7183    | A_51_226859   | Ish3a         | inositol dehydrogenase 3                    | NM_029573          | 1591.9  | 19819.7 | 16160.3 | 16128.3 | 7680.9  | 6900.4 | 7840.25 | 6623.9    | 8079.8    | 17025.05   | 7556.275   | -1.1699539 | 1.2250015  | 0.0215471 |
| 16452   | A_55_2197458  | Ish2          | inositol kinase 2                           | NM_008413          | 2524.1  | 2948.3  | 2839.1  | 2613.6  | 1268.7  | 1226.1 | 1118.8  | 1326.8    | 2732.525  | 1231.1     | -1.1704141 | 1.2250729  | 0.0172642  |           |
| 69098   | A_55_2213151  | Rab39b        | RAB39B, member RAS oncogene family          | NM_021347          | 191.4   | 191.4   | 191.4   | 191.4   | 12.4    | 14.6   | 14.7    | 14.7      | 14.7      | 14.7       | -1.1705614 | 1.2252738  | 0.0219388  |           |
| 21780   | A_51_9448203  | Ctlnb         | cellular nuclear acid binding 1             | NM_013493          | 15518.4 | 16241.1 | 15232.9 | 15749.9 | 6967.8  | 6557.8 | 6186.6  | 7181.6    | 15735.825 | 6617.8     | -1.1712623 | 1.2253842  | 0.0035994  |           |
| 7544    | A_55_2409769  | Mrv1          | MRV integration site 1                      | NM_194464          | 254.1   | 218.8   | 281.3   | 245.1   | 104.2   | 118.3  | 128.5   | 93        | 249.825   | 111        | -1.1754032 | 1.2258599  | 0.0105626  |           |
| 17820   | A_55_2194878  | Dnajc21       | DnaJ (Hsp40) homolog, subfamily C           | NM_030046          | 2346.7  | 2513.7  | 2303.5  | 2416.4  | 1093.3  | 1116   | 999.5   | 1029.5    | 2395.075  | 1059.575   | -1.177221  | 1.2261076  | 0.0039307  |           |
| 46713   | A_55_2198478  | Ube2d         | ubiquitin-conjugating factor 5, cytosolic   | NM_020946          | 454.6   | 381.4   | 375.8   | 448.8   | 139.5   | 147.2  | 147.2   | 147.2     | 454.6     | 147.2      | -1.1780421 | 1.2261649  | 0.0219388  |           |
| 41093   | A_55_2212210  | RA83002N09rsk | RAKEN CDNA 83002N09 gene                    | AK139944           | 506.3   | 630.6   | 465.5   | 605     | 252.1   | 272.4  | 228.6   | 217.6     | 551.85    | 242.675    | -1.1795518 | 1.2265064  | 0.0093913  |           |
| 215280  | A_55_2673282  | Wipf1         | WAS/WASL interacting protein                | NM_153138          | 404.1   | 384.5   | 380.5   | 381.7   | 154.6   | 205.1  | 176.4   | 152.3     | 387.7     | 172.1      | -1.1818493 | 1.2268874  | 0.0139340  |           |
| 10892   | A_51_920888   | Rim3c         | inositol 1,4,5-trisphosphate receptor       | NM_027722          | 3049.7  | 3181    | 3344.1  | 3374.8  | 1618.8  | 1500.9 | 1286.8  | 1530.6    | 3348.55   | 1499.275   | -1.1818493 | 1.2268874  | 0.0139340  |           |
| 215165  | A_55_2196555  | Sclt2a1       | soluble carrier family 1 (facilin)          | ENSMUST00000042261 | 1400.1  | 1501.8  | 141     |         |         |        |         |           |           |            |            |            |            |           |



|          |               |               |                                          |                     |         |         |         |         |        |         |         |         |           |            |            |            |            |
|----------|---------------|---------------|------------------------------------------|---------------------|---------|---------|---------|---------|--------|---------|---------|---------|-----------|------------|------------|------------|------------|
| 108761   | A_55_1202036  | Prrc1         | proline-rich nuclear receptor            | NM_001033225        | 3482.5  | 3358.9  | 3825.1  | 3764.6  | 1506.7 | 1592.7  | 1431.4  | 1380.4  | 3607.775  | 1477.675   | -1.287948  | -2.4415457 | 0.00027218 |
| 12293    | A_55_1938899  | Cacna2t1      | calcium channel, voltage-dependent       | NM_001108483        | 10875.7 | 11349.8 | 12142.4 | 11613.2 | 4504.1 | 4776.4  | 4880    | 4653.9  | 14490.725 | 4703.6     | -1.2881016 | -2.44205   | 0.00020471 |
| 12493    | A_55_1211245  | Cacna2t2      | calcium channel, voltage-dependent       | NM_001076764        | 821.77  | 894.4   | 922.4   | 988.3   | 389.3  | 395.3   | 371.4   | 372.6   | 66.8      | 37.15      | -1.2897458 | -2.4448808 | 0.0007236  |
| 76551    | A_55_1916949  | Cdcd6         | coiled-coil domain containing            | NM_001111211        | 616.9   | 586.1   | 686.6   | 670.8   | 254.9  | 238.5   | 282.5   | 270.8   | 64.0      | 261.675    | -1.2905342 | -2.446182  | 0.00144536 |
| 78384    | A_55_2201848  | 241012L7L17Rk | RKEN CDNA 241012L7L17Rk                  |                     | 10762.3 | 10065.3 | 10817.8 | 10441.1 | 4024.8 | 3703.4  | 4177.3  | 5450.5  | 10506.625 | 4311.3     | -1.2908543 | -2.446729  | 0.00262544 |
| 10912    | A_55_1936803  | Psm9          | proteasome (prosome, macropain)          | NM_0013385          | 217.2   | 212.6   | 241.3   | 193.3   | 75.6   | 96.6    | 84.8    | 96      | 216.1     | 88.25      | -1.2947599 | -2.453361  | 0.00862947 |
| 13086    | A_55_1915433  | Ubr1          | ubiquitin translocation factor           | NM_007917           | 738.4   | 708.7   | 784.6   | 780.4   | 299.7  | 279.5   | 277.7   | 717.1   | 293.575   | 229.575    | -1.2968716 | -2.4609886 | 0.0005793  |
| 45790    | A_55_1920191  | Setd8         | SET domain containing (lysine N-60241)   |                     | 7156.7  | 6212.9  | 7685.9  | 6494.6  | 2879.9 | 2761.2  | 2571.3  | 3078.5  | 6899.1    | 2820.475   | -1.2979047 | -2.4578154 | 0.00280607 |
| 140740   | A_55_1917124  | Ndufa4l2      | NADH dehydrogenase (ubiquinone)          | NM_001098789        | 896.8   | 870.9   | 769.2   | 855.5   | 310.8  | 388.3   | 333.7   | 348.2   | 848.1     | 345.25     | -1.2989485 | -2.4604948 | 0.00216285 |
| 40756    | A_55_1920103  | Htr7          | 5-hydroxytryptamine (serotonin)          | NM_008315           | 118.3   | 147.7   | 153.1   | 148.9   | 56.1   | 59.7    | 58.9    | 53.8    | 141.825   | 57.125     | -1.3057978 | -2.472204  | 0.00262146 |
| 217860   | A_55_2140313  | Non           | nucleolin homolog 2 (Drosophila)         | NM_00117710         | 62.5    | 62.7    | 24.2    | 21.9    | 8.7    | 27      | 26.1    | 27.2    | 66.8      | 27.2       | -1.3062909 | -2.4739023 | 0.0006937  |
| 10679    | A_55_2203500  | Ltbpa         | latent transforming growth factor        | NM_175641           | 1522.7  | 1274.4  | 1375.3  | 1256.4  | 507.7  | 666.2   | 560     | 472.1   | 1357.2    | 551.5      | -1.3071884 | -2.4745881 | 0.00249387 |
| 10765    | A_55_2203143  | Ltyle         | lymphocyte antigen 6 complex             | NM_001164036        | 2043    | 1674.7  | 1785.6  | 1401.1  | 607.1  | 732.1   | 798.6   | 650.3   | 1726.75   | 694.1      | -1.3080941 | -2.4784719 | 0.00423566 |
| 19125    | A_55_2215438  | Proth         | proline dehydrogenase                    | NM_011172           | 1889.6  | 2128.6  | 1965.6  | 1590    | 754.3  | 772.4   | 714     | 799.3   | 1899.45   | 760        | -1.3101367 | -2.4796504 | 0.00416437 |
| 76143    | A_55_22008407 | Par124        | angiogenin inhibitor 1, regulator        | NM_1332636          | 732     | 602.7   | 695.9   | 543.8   | 274.6  | 142.6   | 258.6   | 253.5   | 602.75    | 257        | -1.3153202 | -2.488925  | 0.00716586 |
| 10054014 | A_55_2203823  | Gm16062       | angiopoietin-like E                      | ENSMUST0000018125   | 2923.5  | 3561.4  | 3486.9  | 3215.1  | 1374.4 | 1096.5  | 1662.6  | 1440    | 3298.95   | 1340.375   | -1.3154655 | -2.4888262 | 0.00681755 |
| 17996    | A_55_22116978 | Neb           | nebulin                                  | NM_010889           | 29515.1 | 31528.4 | 35324.2 | 32271.5 | 13734  | 13152.5 | 12377.9 | 13730.6 | 32167.95  | 12906.75   | -1.3156511 | -2.4891464 | 0.00676756 |
| 56812    | A_55_2202307  | Dnajb2        | deaf1 homolog 2 (Drosophila)             | NM_178055           | 155     | 159.9   | 182.5   | 185.2   | 67.5   | 64.1    | 66.2    | 75.9    | 170.65    | 68.425     | -1.316997  | -2.4914607 | 0.0021121  |
| 73828    | A_55_2170641  | Dcaf4         | DDI1 and CUL4 associated 2               | NM_030246           | 714.6   | 641.9   | 633     | 583.8   | 278.25 | 215.2   | 269.6   | 260.1   | 643.325   | 258.1      | -1.3212115 | -2.498785  | 0.0065711  |
| 20720    | A_55_2268904  | Serpin2e      | serine (or cysteine) peptidase inhibitor | NM_009225           | 220     | 244.4   | 201.7   | 243.5   | 97.9   | 94.6    | 86.4    | 84.6    | 227.45    | 90.775     | -1.3217338 | -2.4996633 | 0.0019708  |
| 69601    | A_55_2197746  | Dagap2        | diacylglycerol domain 2 (Drosophila)     | NM_1331125          | 45.8    | 45.8    | 48.6    | 34      | 14.7   | 17.4    | 16.3    | 17      | 43.45     | 17.175     | -1.3260913 | -2.508775  | 0.0150883  |
| 72759    | A_55_2166824  | Csgpt         | chondroitin sulfate proteoglycan         | NM_139001           | 220     | 188.1   | 184.3   | 161.5   | 63.4   | 75      | 74.9    | 81.7    | 183.925   | 73.25      | -1.3313244 | -2.516337  | 0.0038449  |
| 7384     | A_55_2220062  | Mmp15         | matrix metalloproteinase 15              | NM_008069           | 90.6    | 82.6    | 104.6   | 88.1    | 30.2   | 32.7    | 42.3    | 41.1    | 91.425    | 36.75      | -1.3319926 | -2.51705   | 0.0028227  |
| 17831    | A_55_2196457  | Anhrf6        | Rac/CE2 guanine nucleotide               | NM_152801           | 6120.8  | 6761.6  | 6206.6  | 6903.5  | 2459.3 | 2859.5  | 2270.7  | 2749.6  | 6491.75   | 2584.775   | -1.3325989 | -2.518596  | 0.00666707 |
| 329154   | A_55_229151   | Nup224        | nucleolar rRNA repeat domain 4           | NM_00117733         | 42.5    | 30.8    | 32.2    | 28.7    | 15.9   | 17.5    | 17.5    | 37.1    | 15.9      | 15.25      | -1.334137  | -2.5212478 | 0.0007602  |
| 22210    | A_55_2483557  | Ube2z         | ubiquitin-conjugating enzyme             | NM_004858           | 4907.3  | 5982.1  | 5584    | 6233.3  | 2215.1 | 2210.9  | 2151.4  | 2385.9  | 5676.675  | 2240.825   | -1.336265  | -2.524869  | 0.00164001 |
| 109652   | A_55_2166288  | Acy1          | aminoacylase 1                           | NM_025371           | 73.5    | 79.9    | 80.9    | 78.1    | 22.7   | 29.5    | 39      | 32      | 76.6      | 30.85      | -1.3377097 | -2.5274976 | 0.0077639  |
| 18906    | A_55_2123077  | Lmbn1         | lamin B1                                 | NM_010721           | 105.7   | 134     | 88.9    | 88.7    | 42.4   | 41.5    | 37      | 104.325 | 40.725    | -1.338023  | -2.5284065 | 0.00468871 |            |
| 231017   | A_55_2212203  | Clp15         | clathrin channel tetramer                | NM_146380           | 13785.3 | 14563.8 | 13200.8 | 4971.7  | 5374.7 | 5374.7  | 5667.4  | 16327.5 | 5837.25   | -1.3390772 | -2.530071  | 0.0150883  |            |
| 372755   | A_55_2196833  | Kat1          | KAP associated factor 1                  | NM_001073713        | 15.6    | 133.6   | 144.1   | 133.1   | 52.4   | 55.6    | 60.1    | 51.3    | 139.4     | 54.95      | -1.342107  | -2.5352144 | 0.0038449  |
| 14081    | A_55_2463452  | Acd1          | acyl-CoA synthase long-chain             | NM_007981           | 655.8   | 658.7   | 806.7   | 806.7   | 274.1  | 336.2   | 280.2   | 282.1   | 746.025   | 293.15     | -1.3423621 | -2.535661  | 0.0031706  |
| 380753   | A_55_22024591 | Atn7n1        | atrxin 7-like 1                          | NM_028139           | 620.5   | 485.2   | 564.3   | 478.4   | 181.5  | 224.7   | 214.4   | 220.6   | 534.6     | 210.3      | -1.3427969 | -2.5364258 | 0.00190461 |
| 52778    | A_55_21737601 | Icam          | basal cell adhesion molecule             | NM_020486           | 263.6   | 224     | 292.9   | 253.3   | 87.4   | 117.1   | 103.2   | 104.8   | 258.45    | 101.775    | -1.3436721 | -2.5379648 | 0.0076476  |
| 18230    | A_55_2208111  | Non           | nucleolin homolog 2 (Drosophila)         | ENSMUST000000021024 | 113.6   | 92.8    | 92.8    | 104.6   | 31.4   | 46      | 41.6    | 41.6    | 106.24    | 41.6       | -1.3438266 | -2.5398033 | 0.0061903  |
| 68778    | A_55_22035484 | Mbnl1         | RKEN CDNA 1110038071Rk                   |                     | 5531.2  | 5961.9  | 6065.8  | 4662.1  | 2117.6 | 2240.3  | 2109.8  | 2240.3  | 5595.425  | 2178.625   | -1.3444773 | -2.5398187 | 0.00260811 |
| 52778    | A_55_22005025 | Mbnl1         | metadefin-like 1 (Drosophila)            | NM_020007           | 854.9   | 1044.8  | 10767   | 11322.5 | 3912.8 | 4207.1  | 3859.1  | 4088.3  | 10264.325 | 4005.875   | -1.3464393 | -2.5428375 | 0.0029211  |
| 24478    | A_55_2160439  | Cybbg3        | beta-gamma crystallin domain             | NM_174848           | 5399.6  | 5927.7  | 5437.6  | 6655.1  | 2409.2 | 2633    | 2013.7  | 2166.4  | 5865.5    | 2026.75    | -1.347462  | -2.544038  | 0.00776885 |
| 108080   | A_55_2195040  | Clp1          | clathrin channel tetramer                | NM_139001           | 113.6   | 92.8    | 92.8    | 104.6   | 31.4   | 46      | 41.6    | 41.6    | 106.24    | 41.6       | -1.3478262 | -2.5442108 | 0.0061903  |
| 15484    | A_55_2127297  | Hsd1l1b1      | hydroxysteroid (11-beta dehydrogenase)   | NM_008288           | 988.1   | 879.3   | 878.2   | 764.1   | 332.3  | 353.6   | 377.6   | 312.2   | 877.425   | 343.925    | -1.3484874 | -2.5500055 | 0.00425243 |
| 10854    | A_55_21976007 | Psm6a         | prosome (prosome, macropain)             | NM_134013           | 2033.1  | 1838.8  | 2418.8  | 1938    | 937.3  | 796.3   | 762.5   | 762.5   | 2057.1575 | 805.625    | -1.3514234 | -2.5516376 | 0.0105431  |
| 20411    | A_55_2205374  | Sorbt1        | Sorbin and SH3 domain coat               | NM_178632           | 11903.8 | 12919.5 | 9571.9  | 11353.6 | 4242   | 5456.3  | 4103.5  | 4130    | 11477.7   | 4482.95    | -1.3516219 | -2.5548912 | 0.0244947  |
| 77038    | A_55_2182992  | Htr7          | 5-hydroxytryptamine (serotonin)          | NM_011087           | 221.9   | 202.8   | 203.6   | 205.7   | 69.7   | 72.9    | 72.9    | 72.9    | 205.7     | 19.55      | -1.35188   | -2.55583   | 0.0282121  |
| 10545    | A_55_21975583 | Hsp3          | heat shock protein 3                     | NM_001110252        | 391.4   | 324.6   | 342.5   | 336.6   | 138.7  | 121.7   | 150.6   | 143.7   | 347.75    | 136.425    | -1.3546331 | -2.5573849 | 0.00193022 |
| 17436    | A_55_22016842 | Nuc1          | nucleolar protein 1, NADP(+)-dependent   | NM_001198933        | 4154.8  | 3891.8  | 4516.6  | 3837.8  | 1563.2 | 1580.1  | 1715.2  | 1544    | 4100.25   | 1600.25    | -1.3552914 | -2.5584878 | 0.0048551  |
| 54004    | A_55_22017266 | Pnc2          | peptic anhydrolase II                    | ENSMUST0000095555   | 89.7    | 70.6    | 75.4    | 72.5    | 30.6   | 26.8    | 27.9    | 35.2    | 77.05     | 30.125     | -1.3564291 | -2.5605003 | 0.01021138 |
| 18032    | A_55_2208571  | Rfx1          | RNA binding factor IX                    | NM_00109168         | 7831.6  | 8064.6  | 8199.8  | 8199.8  | 2636.6 | 2731.4  | 2357.1  | 2357.1  | 8199.8    | 2357.1     | -1.3570552 | -2.5616177 | 0.01057878 |
| 106529   | A_55_227850   | Tecr          | 2,3-enoyl-CoA reductase                  | NM_134118           | 6998.3  | 5867.6  | 6224.8  | 5533.7  | 2343.1 | 2361.9  | 2281.4  | 2568.7  | 6156.1    | 2388.325   | -1.3619579 | -2.5703736 | 0.00344979 |
| 50515    | A_55_22129975 | Rabg1f1       | RAI guanine nucleotide exchange          | NM_019983           | 12080.8 | 11374.1 | 14805.7 | 13802.8 | 4969.9 | 5233.4  | 4659.9  | 5232.8  | 13015.85  | 5027.625   | -1.3659993 | -2.5737466 | 0.01297975 |
| 21384    | A_55_22159259 | Tbr3          | thyroid hormone receptor                 | NM_009380           | 513.9   | 487.2   | 600.7   | 514.7   | 184.8  | 215.2   | 209.1   | 210.5   | 529.325   | 209.1      | -1.3666805 | -2.5787654 | 0.00136064 |
| 218282   | A_55_2212626  | Hsp3          | heat shock protein 3                     | NM_001110252        | 391.4   | 324.6   | 342.5   | 336.6   | 138.7  | 121.7   | 150.6   | 143.7   | 347.75    | 136.425    | -1.366783  | -2.579467  | 0.00193022 |
| 70350    | A_55_2207184  | Tnfr2         | tumor necrosis factor receptor 2         | NM_00181242         | 2193.5  | 2137.7  | 2397.2  | 2745.8  | 1009.9 | 827.8   | 886.7   | 96.3    | 2413.05   | 936.625    | -1.366889  | -2.5791396 | 0.00516858 |
| 78944    | A_55_22150525 | R210303020Rk  | RKEN CDNA 2210330020Rk                   |                     | 1547.5  | 1549.4  | 1345.5  | 1375.6  | 533.1  | 535.1   | 550.2   | 634.9   | 1454.5    | 563.075    | -1.3689933 | -2.5854146 | 0.00125543 |
| 76331    | A_55_2195888  | Ck1d9         | cyclin-dependent kinase 19               | NM_159814           | 552.4   | 579.9   | 472.1   | 374.1   | 173.9  | 173.9   | 184     | 183.5   | 494.125   | 189        | -1.370914  | -2.586343  | 0.0025822  |
| 242328   | A_55_2261550  | Ubr1          | ubiquitin-conjugating enzyme             | NM_004858           | 4907.3  | 5982.1  | 5584    | 6233.3  | 2215.1 | 2210.9  | 2151.4  | 2385.9  | 5676.675  | 2240.825   | -1.3709266 | -2.586343  | 0.0025822  |
| 223697   | A_55_22021115 | Sun2          | Sd1 and UNC59 domain coat                | NM_134342           | 22525.8 | 19338.5 | 21008.2 | 17935.8 | 7422.3 | 7997    | 8003.8  | 7678.2  | 20183.825 | 7775.325   | -1.3719652 | -2.588229  | 0.0084244  |
| 68394    | A_55_22144636 | Cdcd163       | coiled-coil domain containing            | NM_026714           | 369.7   | 379.1   | 393.1   | 321.3   | 120.3  | 143.7   | 160     | 145.4   | 367.8     | 142.35     | -1.3730265 | -2.5901982 | 0.00360242 |
| 56745    | A_55_2199893  | Ctcfp1        | Ct1 and tumor necrosis factor            | NM_019959           | 156.5   | 157.9   | 199.1   | 136.8   | 53.7   | 72.7    | 71.7    | 52.4    | 162.575   | 62.625     | -1.3800076 | -2.6026974 | 0.00928001 |
| 102424   | A_55_2273544  | Nup224        | nucleolar rRNA repeat domain 4           | NM_00117733         | 42.5    | 30.8    | 32.2    | 28.7    | 15.9   | 17.5    | 17.5    | 37.1    | 15.9      | 15.25      | -1.380256  | -2.603897  | 0.0007602  |
| 70912    | A_55_22037141 | Iprt1         | intraflagellar body protein              | NM_028001           | 10765.2 | 9527.2  | 10372.8 | 9780.3  |        |         |         |         |           |            |            |            |            |

|         |             |               |                                           |              |         |         |         |         |         |         |         |          |          |            |            |            |            |           |
|---------|-------------|---------------|-------------------------------------------|--------------|---------|---------|---------|---------|---------|---------|---------|----------|----------|------------|------------|------------|------------|-----------|
| 18645   | A5_02128256 | Pfn2          | profilin 2                                | NM_019410    | 192216  | 20990   | 223974  | 250027  | 862536  | 78315   | 76835   | 746224   | 219005   | 790075     | -1.4663936 | -2.7633027 | 0.0013747  |           |
| 70598   | A5_02146384 | Pfip1         | profilin A interacting protein            | NM_001081243 | 7222    | 27853   | 8531    | 5246    | 256     | 3054    | 251     | 200      | 71895    | 2576       | -1.4678706 | -2.7661331 | 0.0866438  |           |
| 105559  | A5_0181269  | Pfnb2         | muscleblind-like 2                        | NM_175317    | 15816   | 1731    | 1561    | 1731    | 596     | 5247    | 561     | 1571     | 596      | 15513075   | -1.4659432 | -2.7689551 | 0.0054922  |           |
| 218251  | A5_02007878 | Rnf144b       | ring finger protein 144B                  | NM_146042    | 859     | 837     | 816     | 694     | 325     | 314     | 283     | 217      | 8015     | 19025      | -1.4710843 | -2.7723108 | 0.0074366  |           |
| 813     | A5_02196490 | Irf3          | interleukin 33                            | NM_01164724  | 4411    | 4513    | 4134    | 5875    | 1558    | 168     | 2074    | 1507     | 473325   | 20245      | -1.471267  | -2.7726529 | 0.0283616  |           |
| 19727   | A5_02184838 | Rfxn1         | regulatory factor X-associated            | NM_011266    | 3811    | 4137    | 3993    | 4265    | 1093    | 1478    | 1841    | 1527     | 405135   | 148475     | -1.471411  | -2.7729276 | 0.0384899  |           |
| 105559  | A5_0218128  | Hnf1          | heparin sulfate-binding protein 1         | NM_019673    | 1902    | 1902    | 1902    | 1902    | 1902    | 1902    | 1902    | 1902     | 1902     | 1902       | 1902       | -1.471411  | -2.7729276 | 0.0384899 |
| 25358   | A5_02193339 | Aldh1a7       | aldehyde dehydrogenase family 1 member A7 | NM_015121    | 38.4    | 43.4    | 36.1    | 32.3    | 11.8    | 16.2    | 11.5    | 14.7     | 37.95    | 13.55      | -1.4775259 | -2.7770777 | 0.0249016  |           |
| 74205   | A5_02101751 | Det1          | de-ubiquitinated homolog 1 (Arad)         | NM_029585    | 32.29   | 300.9   | 288.1   | 355.1   | 112.1   | 106.1   | 115.9   | 119.8    | 316.75   | 113.475    | -1.4778618 | -2.7835351 | 0.0049637  |           |
| 76375   | A5_02165324 | Ac3f3         | acy-CoA synthetase long-chain             | NM_028817    | 264.5   | 408.5   | 285.4   | 286.5   | 122.5   | 87.3    | 115.5   | 119.8    | 311.225  | 111        | -1.478269  | -2.7864225 | 0.0111906  |           |
| 14088   | A5_02151225 | Fap           | fibrinogen-associated protein             | NM_007996    | 1936.5  | 1972.2  | 2121.3  | 2034.1  | 743.4   | 865.1   | 682.1   | 296      | 201625   | 728        | -1.4785195 | -2.7895021 | 0.0138836  |           |
| 328572  | A5_02141601 | Ep300         | E1A binding protein p300                  | NM_177821    | 1477    | 162.6   | 149.8   | 163.2   | 55.4    | 67      | 60.7    | 55.9     | 167.075  | 59.75      | -1.4804381 | -2.7903455 | 0.0265544  |           |
| 237781  | A5_02232470 | Smc7          | Smith-Magenis syndrome chr7               | NM_001009927 | 145     | 173.9   | 142     | 129.1   | 49.4    | 68      | 42.7    | 53.1     | 147.5    | 53.3       | -1.4808524 | -2.7911359 | 0.0483951  |           |
| 17762   | A5_02100140 | Mapt          | microtubule-associated protein            | NM_001038609 | 8501.1  | 8043.3  | 8615    | 9527.9  | 3413.1  | 2978.3  | 3045.6  | 2978.2   | 8671.825 | 3103.8     | -1.4819268 | -2.7932154 | 0.0033007  |           |
| 1000462 | A5_02167218 | Mndal         | microtubule-associated domain             | NM_001038999 | 19832.6 | 17208.8 | 17408.6 | 17355.1 | 6945.6  | 6250.2  | 6834.7  | 18487.35 | 6595.25  | -1.4888645 | -2.7938928 | 0.0258461  |            |           |
| 68449   | A5_02349572 | Rb34          | myeloid nuclear differentiation 3         | NM_01170853  | 248.4   | 235.5   | 251.5   | 239.8   | 83.7    | 81.5    | 107.5   | 78.3     | 243.8    | 87.5       | -1.4852975 | -2.799749  | 0.0070028  |           |
| 65823   | A5_02198415 | Slc44a2       | Riken cDNA 803049480 gene                 | NM_0183642   | 726.1   | 576.5   | 668.7   | 601.9   | 197.9   | 258.4   | 255.9   | 209.2    | 643.2    | 230.275    | -1.4863059 | -2.8017065 | 0.0010748  |           |
| 64492   | A5_02100395 | Slc44a2       | lysine carrier family 4 member 2          | NM_152808    | 9788.3  | 8250.2  | 8964.6  | 8806.2  | 3331.2  | 3004.4  | 3249.9  | 3172.4   | 8957.325 | 3188.475   | -1.4885736 | -2.806114  | 0.0021847  |           |
| 11551   | A5_02100395 | Adra2a        | adrenoreceptor alpha 2A                   | NM_00109923  | 110.2   | 109.4   | 174     | 105.6   | 40.7    | 42.9    | 47.5    | 42.8     | 124.8    | 43.475     | -1.4909004 | -2.8106344 | 0.0695132  |           |
| 101640  | A5_02145800 | Ail67606      | expressed sequence Ail67606               | NM_178901    | 45.6    | 40.7    | 48      | 33.9    | 16.2    | 14.8    | 17.2    | 11.6     | 42.05    | 14.95      | -1.4950645 | -2.8187675 | 0.0463788  |           |
| 54346   | A5_02190895 | Chtr2         | complement factor H-related               | NM_001025575 | 359.2   | 356.6   | 294.9   | 274.9   | 99      | 104.1   | 100.2   | 114.6    | 296.4    | 104.475    | -1.4951203 | -2.8188766 | 0.0042049  |           |
| 11988   | A5_02075281 | Adapt1        | ATFase, aminophospholipid                 | NM_001038999 | 581.7   | 546.2   | 745.5   | 588.4   | 236.5   | 216.5   | 202.6   | 640.5    | 225.925  | -1.4954988 | -2.8219563 | 0.0279127  |            |           |
| 79785   | A5_02117683 | Rnf115        | ring finger protein 115                   | NM_020646    | 329.2   | 203.4   | 374.0   | 330.2   | 110.0   | 122.17  | 112.87  | 103.65   | 333.65   | 117.5425   | -1.4959398 | -2.8217447 | 0.0020075  |           |
| 108143  | A5_02208270 | Taf9          | TAF9 RNA polymerase II, TAF               | NM_027592    | 1978    | 2057.8  | 2176    | 1763.6  | 666.9   | 697.5   | 742     | 692.892  | 370.125  | -1.5007426 | -2.8239961 | 0.0003448  |            |           |
| 56188   | A5_02193797 | Fyfp1         | FXF1 domain-containing protein            | NM_052992    | 51430.6 | 47318.1 | 47740.3 | 50593.9 | 19213.2 | 18620.7 | 16778.6 | 15346.1  | 49334.15 | 17489.65   | -1.5008513 | -2.8300966 | 0.0004549  |           |
| 14769   | A5_02193797 | Fyfp1         | FXF1 domain-containing protein            | NM_052992    | 51430.6 | 47318.1 | 47740.3 | 50593.9 | 19213.2 | 18620.7 | 16778.6 | 15346.1  | 49334.15 | 17489.65   | -1.5008513 | -2.8300966 | 0.0004549  |           |
| 74762   | A5_02184339 | Rfg           | RNA domain-containing protein             | NM_001081160 | 169.4   | 113.2   | 116.1   | 174.1   | 141.7   | 48.9    | 48.3    | 53       | 147.7    | 51.35      | -1.5055552 | -2.8393548 | 0.0210101  |           |
| 607375  | A5_02166043 | AK3006916iRik | Riken cDNA A3006916 gene                  | NM_015464    | 229.9   | 267.3   | 231.5   | 325     | 96.6    | 75.8    | 91.4    | 106.6    | 263.425  | 92.45      | -1.506385  | -2.8402728 | 0.0263835  |           |
| 54403   | A5_02193922 | Slc44a4       | lysine carrier family 4 member 4          | NM_018760    | 4187    | 2992    | 4471    | 3806    | 1459    | 1026    | 1584    | 1373     | 386.4    | 136.05     | -1.5082464 | -2.8446406 | 0.0872793  |           |
| 20442   | A5_02193084 | Slc44a4       | lysine carrier family 4 member 4          | NM_018760    | 4187    | 2992    | 4471    | 3806    | 1459    | 1026    | 1584    | 1373     | 386.4    | 136.05     | -1.5082464 | -2.8446406 | 0.0872793  |           |
| 23887   | A5_02106104 | Slc44a4       | lysine carrier family 4 member 4          | NM_018760    | 4187    | 2992    | 4471    | 3806    | 1459    | 1026    | 1584    | 1373     | 386.4    | 136.05     | -1.5082464 | -2.8446406 | 0.0872793  |           |
| 56175   | A5_02157033 | Bace2         | beta-site APP-cleaving enzyme 2           | NM_019517    | 429.1   | 474     | 554.7   | 544.6   | 143.4   | 237.1   | 181     | 158.1    | 506.45   | 179.9      | -1.5125643 | -2.8513167 | 0.0638618  |           |
| 20360   | A5_02156126 | Sema6c        | semaphorin 6C                             | NM_001000001 | 9687.7  | 8120.5  | 7853    | 8588.1  | 2918.1  | 3019.1  | 3089.4  | 2993.3   | 8562.325 | 2989.975   | -1.5135766 | -2.8515699 | 0.0027669  |           |
| 97884   | A5_02156126 | Sema6c        | semaphorin 6C                             | NM_001000001 | 9687.7  | 8120.5  | 7853    | 8588.1  | 2918.1  | 3019.1  | 3089.4  | 2993.3   | 8562.325 | 2989.975   | -1.5135766 | -2.8515699 | 0.0027669  |           |
| 24527   | A5_02197680 | Slc44a4       | lysine carrier family 4 member 4          | NM_018760    | 4187    | 2992    | 4471    | 3806    | 1459    | 1026    | 1584    | 1373     | 386.4    | 136.05     | -1.5146661 | -2.8571288 | 0.0014479  |           |
| 56175   | A5_02157033 | Bace2         | beta-site APP-cleaving enzyme 2           | NM_019517    | 429.1   | 474     | 554.7   | 544.6   | 143.4   | 237.1   | 181     | 158.1    | 506.45   | 179.9      | -1.5125643 | -2.8513167 | 0.0638618  |           |
| 20360   | A5_02156126 | Sema6c        | semaphorin 6C                             | NM_001000001 | 9687.7  | 8120.5  | 7853    | 8588.1  | 2918.1  | 3019.1  | 3089.4  | 2993.3   | 8562.325 | 2989.975   | -1.5135766 | -2.8515699 | 0.0027669  |           |
| 97884   | A5_02156126 | Sema6c        | semaphorin 6C                             | NM_001000001 | 9687.7  | 8120.5  | 7853    | 8588.1  | 2918.1  | 3019.1  | 3089.4  | 2993.3   | 8562.325 | 2989.975   | -1.5135766 | -2.8515699 | 0.0027669  |           |
| 24527   | A5_02197680 | Slc44a4       | lysine carrier family 4 member 4          | NM_018760    | 4187    | 2992    | 4471    | 3806    | 1459    | 1026    | 1584    | 1373     | 386.4    | 136.05     | -1.5146661 | -2.8571288 | 0.0014479  |           |
| 56175   | A5_02157033 | Bace2         | beta-site APP-cleaving enzyme 2           | NM_019517    | 429.1   | 474     | 554.7   | 544.6   | 143.4   | 237.1   | 181     | 158.1    | 506.45   | 179.9      | -1.5125643 | -2.8513167 | 0.0638618  |           |
| 20360   | A5_02156126 | Sema6c        | semaphorin 6C                             | NM_001000001 | 9687.7  | 8120.5  | 7853    | 8588.1  | 2918.1  | 3019.1  | 3089.4  | 2993.3   | 8562.325 | 2989.975   | -1.5135766 | -2.8515699 | 0.0027669  |           |
| 97884   | A5_02156126 | Sema6c        | semaphorin 6C                             | NM_001000001 | 9687.7  | 8120.5  | 7853    | 8588.1  | 2918.1  | 3019.1  | 3089.4  | 2993.3   | 8562.325 | 2989.975   | -1.5135766 | -2.8515699 | 0.0027669  |           |
| 24527   | A5_02197680 | Slc44a4       | lysine carrier family 4 member 4          | NM_018760    | 4187    | 2992    | 4471    | 3806    | 1459    | 1026    | 1584    | 1373     | 386.4    | 136.05     | -1.5146661 | -2.8571288 | 0.0014479  |           |
| 56175   | A5_02157033 | Bace2         | beta-site APP-cleaving enzyme 2           | NM_019517    | 429.1   | 474     | 554.7   | 544.6   | 143.4   | 237.1   | 181     | 158.1    | 506.45   | 179.9      | -1.5125643 | -2.8513167 | 0.0638618  |           |
| 20360   | A5_02156126 | Sema6c        | semaphorin 6C                             | NM_001000001 | 9687.7  | 8120.5  | 7853    | 8588.1  | 2918.1  | 3019.1  | 3089.4  | 2993.3   | 8562.325 | 2989.975   | -1.5135766 | -2.8515699 | 0.0027669  |           |
| 97884   | A5_02156126 | Sema6c        | semaphorin 6C                             | NM_001000001 | 9687.7  | 8120.5  | 7853    | 8588.1  | 2918.1  | 3019.1  | 3089.4  | 2993.3   | 8562.325 | 2989.975   | -1.5135766 | -2.8515699 | 0.0027669  |           |
| 24527   | A5_02197680 | Slc44a4       | lysine carrier family 4 member 4          | NM_018760    | 4187    | 2992    | 4471    | 3806    | 1459    | 1026    | 1584    | 1373     | 386.4    | 136.05     | -1.5146661 | -2.8571288 | 0.0014479  |           |
| 56175   | A5_02157033 | Bace2         | beta-site APP-cleaving enzyme 2           | NM_019517    | 429.1   | 474     | 554.7   | 544.6   | 143.4   | 237.1   | 181     | 158.1    | 506.45   | 179.9      | -1.5125643 | -2.8513167 | 0.0638618  |           |
| 20360   | A5_02156126 | Sema6c        | semaphorin 6C                             | NM_001000001 | 9687.7  | 8120.5  | 7853    | 8588.1  | 2918.1  | 3019.1  | 3089.4  | 2993.3   | 8562.325 | 2989.975   | -1.5135766 | -2.8515699 | 0.0027669  |           |
| 97884   | A5_02156126 | Sema6c        | semaphorin 6C                             | NM_001000001 | 9687.7  | 8120.5  | 7853    | 8588.1  | 2918.1  | 3019.1  | 3089.4  | 2993.3   | 8562.325 | 2989.975   | -1.5135766 | -2.8515699 | 0.0027669  |           |
| 24527   | A5_02197680 | Slc44a4       | lysine carrier family 4 member 4          | NM_018760    | 4187    | 2992    | 4471    | 3806    | 1459    | 1026    | 1584    | 1373     | 386.4    | 136.05     | -1.5146661 | -2.8571288 | 0.0014479  |           |
| 56175   | A5_02157033 | Bace2         | beta-site APP-cleaving enzyme 2           | NM_019517    | 429.1   | 474     | 554.7   | 544.6   | 143.4   | 237.1   | 181     | 158.1    | 506.45   | 179.9      | -1.5125643 | -2.8513167 | 0.0638618  |           |
| 20360   | A5_02156126 | Sema6c        | semaphorin 6C                             | NM_001000001 | 9687.7  | 8120.5  | 7853    | 8588.1  | 2918.1  | 3019.1  | 3089.4  | 2993.3   | 8562.325 | 2989.975   | -1.5135766 | -2.8515699 | 0.0027669  |           |
| 97884   | A5_02156126 | Sema6c        | semaphorin 6C                             | NM_001000001 | 9687.7  | 8120.5  | 7853    | 8588.1  | 2918.1  | 3019.1  | 3089.4  | 2993.3   | 8562.325 | 2989.975   | -1.5135766 | -2.8515699 | 0.0027669  |           |
| 24527   | A5_02197680 | Slc44a4       | lysine carrier family 4 member 4          | NM_018760    | 4187    | 2992    | 4471    | 3806    | 1459    | 1026    | 1584    | 1373     | 386.4    | 136.05     | -1.5146661 | -2.8571288 | 0.0014479  |           |
| 56175   | A5_02157033 | Bace2         | beta-site APP-cleaving enzyme 2           | NM_019517    | 429.1   | 474     | 554.7   | 544.6   | 143.4   | 237.1   | 181     | 158.1    | 506.45   | 179.9      | -1.5125643 | -2.8513167 | 0.0638618  |           |
| 20360   | A5_02156126 | Sema6c        | semaphorin 6C                             | NM_001000001 | 9687.7  | 8120.5  | 7853    | 8588.1  | 2918.1  | 3019.1  | 3089.4  | 2993.3   | 8562.325 | 2989.975   | -1.5135766 | -2.8515699 | 0.0027669  |           |
| 97884   | A5_02156126 | Sema6c        | semaphorin 6C                             | NM_001000001 | 9687.7  | 8120.5  | 7853    | 8588.1  | 2918.1  | 3019.1  | 3089.4  | 2993.3   | 8562.325 | 2989.975   | -1.5135766 | -2.8515699 | 0.0027669  |           |
| 24527   | A5_02197680 | Slc44a4       | lysine carrier family 4 member 4          | NM_018760    | 4187    | 2992    | 4471    | 3806    | 1459    | 1026    | 1584    | 1373     | 386.4    | 136.05     | -1.5146661 | -2.8571288 | 0.0014479  |           |
| 56175   | A5_02157033 | Bace2         | beta-site APP-cleaving enzyme             |              |         |         |         |         |         |         |         |          |          |            |            |            |            |           |

|           |               |              |         |         |         |         |         |         |         |          |           |            |            |            |           |
|-----------|---------------|--------------|---------|---------|---------|---------|---------|---------|---------|----------|-----------|------------|------------|------------|-----------|
| 20284     | A_51_P380432  | Scx          | 1683.2  | 1754.3  | 1514.4  | 1799.8  | 607.9   | 573.1   | 413.6   | 1687.925 | 523.525   | -1.6843377 | -3.2139282 | 0.0017968  |           |
| 40780     | A_55_P2011912 | Excn2        | 542.8   | 674.5   | 556.3   | 837.7   | 17.5    | 22.6    | 198.2   | 192.6    | 641.075   | 197.025    | -1.6846741 | -3.2146776 | 0.0131987 |
| 22328     | A_55_P2088181 | Pncd3        | 193.6   | 256.4   | 193.6   | 193.6   | 167.8   | 181.3   | 181.3   | 181.3    | 181.3     | 174.02     | -1.68502   | -3.2154485 | 0.0090921 |
| 7294      | A_55_P1939260 | Tppp         | 179.3   | 204.2   | 264     | 191     | 63.6    | 65.2    | 66.4    | 62.5     | 209.625   | 64.425     | -1.6863108 | -3.2182927 | 0.0022448 |
| 20461     | A_55_P1973926 | tpo13        | 15479.6 | 14663.3 | 13721.1 | 13301.5 | 4468.8  | 4493.8  | 4387.6  | 4376.3   | 14288.875 | 4431.625   | -1.6868511 | -3.2212897 | 3.6499675 |
| 20787     | A_55_P2002527 | Srsf1        | 492.4   | 491.9   | 403.4   | 315.7   | 101.8   | 123.1   | 145     | 157      | 425.85    | 131.875    | -1.6873902 | -3.2220754 | 0.0725144 |
| 23187     | A_55_P1939732 | Rpl30        | 400.3   | 367.4   | 327.99  | 327.99  | 1167.1  | 1157.6  | 1278.3  | 1138.1   | 367.875   | 118.275    | -1.6889189 | -3.2237741 | 0.0055462 |
| 21055     | A_55_P463428  | Pik3ip1      | 2180.8  | 2182.7  | 2777.1  | 2261.1  | 6184.9  | 837.6   | 884.9   | 60       | 2350.425  | 735.725    | -1.689802  | -3.2261242 | 0.0177165 |
| 1264      | A_52_P586944  | Bmpr1b       | 71.2    | 93.8    | 87.5    | 59.2    | 20.2    | 26.4    | 21.7    | 27.4     | 77.925    | 23.925     | -1.6923953 | -3.2312985 | 0.0346678 |
| 20066     | A_55_P2122180 | stn1a        | 10035.8 | 13866.7 | 14210.8 | 17377.9 | 4528.7  | 4578.9  | 4681    | 4091.7   | 14462.8   | 4469.85    | -1.6931127 | -3.2335361 | 9.85E-05  |
| 6174      | A_55_P2025386 | Rpl30        | 193.6   | 256.4   | 193.6   | 193.6   | 167.8   | 181.3   | 181.3   | 181.3    | 181.3     | 174.02     | -1.6932861 | -3.2339827 | 0.0131987 |
| 26903     | A_51_P152747  | Nrip1        | 2467.5  | 2318.3  | 2536.2  | 1975.4  | 667.4   | 754.9   | 680.5   | 696.1    | 3279.35   | 699.725    | -1.6978283 | -3.2441225 | 0.0040778 |
| 17164     | A_52_P15008   | Makap2k      | 3511.4  | 3084.4  | 3410.2  | 3100.5  | 1028.9  | 978.5   | 1000.5  | 1021.2   | 3276.875  | 1007.275   | -1.699782  | -3.2485187 | 3.51E-05  |
| 23334     | A_52_P205797  | Igfbp1       | 147.4   | 129.4   | 149.4   | 142     | 36.9    | 54.2    | 36.7    | 49.3     | 142.05    | 44.275     | -1.7012691 | -3.2518688 | 0.0087514 |
| 21885     | A_55_P1983922 | Rpl30        | 174     | 174     | 174     | 174     | 174     | 174     | 174     | 174      | 174       | 174        | -1.7023742 | -3.2550376 | 0.0108236 |
| 17005     | A_55_P122649  | Dgk2         | 15      | 19.9    | 25.4    | 14.8    | 5.2     | 6.4     | 6.1     | 4.9      | 18.775    | 5.65       | -1.7042436 | -3.258987  | 0.0741451 |
| 12605     | A_55_P2177386 | Crad         | 490.8   | 467.1   | 461.8   | 581.6   | 152.2   | 152.7   | 162     | 144.8    | 500.325   | 152.925    | -1.7048596 | -3.259972  | 0.0025014 |
| 6748      | A_55_P1581808 | Mind         | 2131.5  | 2267.9  | 2573.2  | 2142    | 727.1   | 758.3   | 708.6   | 600.9    | 2278.65   | 698.725    | -1.7069824 | -3.2639307 | 0.0053495 |
| 21885     | A_55_P1983922 | Rpl30        | 174     | 174     | 174     | 174     | 174     | 174     | 174     | 174      | 174       | 174        | -1.7069824 | -3.2639307 | 0.0053495 |
| 1446      | A_55_P203955  | Gbp2         | 311.6   | 276.5   | 345     | 286.8   | 106.6   | 106.4   | 109.8   | 73.7     | 304.975   | 94.2       | -1.7084001 | -3.2680026 | 0.0010532 |
| 20205     | A_55_P2018017 | Tnfrsf10     | 253.4   | 359.7   | 310.9   | 218.6   | 76.3    | 91      | 80.6    | 96.6     | 285.65    | 86.125     | -1.7100786 | -3.2717865 | 0.0237888 |
| 10050767  | A_55_P2038832 | L10C0502767  | 3346    | 3625.8  | 3069.5  | 1992.4  | 1025.1  | 892.8   | 875.9   | 806      | 3008.425  | 899.95     | -1.7108461 | -3.2735275 | 0.0660873 |
| 20205     | A_55_P2018017 | Tnfrsf10     | 253.4   | 359.7   | 310.9   | 218.6   | 76.3    | 91      | 80.6    | 96.6     | 285.65    | 86.125     | -1.7100786 | -3.2717865 | 0.0237888 |
| 70232     | A_55_P1939260 | Doye2        | 184.3   | 176.7   | 156.6   | 184.7   | 57.5    | 50.4    | 44.7    | 51.3     | 167.325   | 50.975     | -1.7122193 | -3.2766449 | 0.0055225 |
| 6728      | A_55_P1939260 | Cap2         | 378.7   | 475.3   | 413.8   | 409.24  | 133.2   | 134.8   | 132.2   | 107.9    | 417.91    | 120.675    | -1.7181714 | -3.291912  | 0.0079388 |
| 20978     | A_55_P2007408 | Rpl30        | 174     | 174     | 174     | 174     | 174     | 174     | 174     | 174      | 174       | 174        | -1.7189751 | -3.2928825 | 0.0092892 |
| 57765     | A_55_P501364  | Tbx21        | 102.8   | 102.8   | 71.8    | 89.7    | 67.2    | 19.4    | 30      | 25.3     | 25.5      | 25.05      | -1.7219161 | -3.2987424 | 0.0006705 |
| 76751     | A_55_P249608  | trid1        | 53470.4 | 49177.5 | 55605.9 | 50754.4 | 15919.5 | 14836.9 | 17365.1 | 15439.7  | 52387.05  | 17221.12   | -1.7221112 | -3.2991886 | 5.47E-05  |
| 11472     | A_55_P198266  | Actn2        | 11068.9 | 11076.5 | 7753.4  | 10958.6 | 3180.4  | 4159.4  | 2592    | 2472.7   | 10136.7   | 3102.25    | -1.7242337 | -3.3042519 | 0.0738766 |
| 15313     | A_55_P2031082 | Rpl30        | 174     | 174     | 174     | 174     | 174     | 174     | 174     | 174      | 174       | 174        | -1.7253856 | -3.3273158 | 0.0029656 |
| 5945      | A_55_P198988  | Sycp1        | 1819.8  | 1972.3  | 1675    | 1414.9  | 497.7   | 558.8   | 508.4   | 464.7    | 1675.9    | 502.4      | -1.7345419 | -3.3277743 | 0.0061935 |
| 6882      | A_52_P562467  | Sync         | 1244.6  | 1244.8  | 1235.3  | 1024.1  | 390     | 346.5   | 356.5   | 327      | 1187.2    | 355        | -1.7397511 | -3.3397754 | 0.0042606 |
| 66757     | A_55_P210890  | Gm8709       | 9430.6  | 8259.6  | 10247.7 | 7292.2  | 2429.1  | 2508.7  | 2806.9  | 2733.8   | 8807.52   | 2619.625   | -1.7399392 | -3.3421008 | 0.0019048 |
| 54357     | A_55_P210890  | Igfbp1       | 62.9    | 51.6    | 45.6    | 98      | 21.2    | 17.2    | 11.8    | 16.6     | 55.025    | 16.7       | -1.7409842 | -3.3426312 | 0.0499412 |
| 78416     | A_55_P104068  | Itih4        | 20.2    | 17.9    | 19.1    | 19.1    | 19.1    | 19.1    | 19.1    | 19.1     | 19.1      | 19.1       | -1.74761   | -3.3498262 | 0.0082337 |
| 6642      | A_55_P2096883 | Steap3       | 30      | 28.4    | 32.3    | 284     | 94.1    | 84.9    | 103.3   | 81.4     | 307.1     | 90.925     | -1.7516618 | -3.3746224 | 0.0011284 |
| 10579     | A_55_P219350  | Hsp90        | 551.6   | 506.5   | 552     | 453.9   | 150.9   | 155.7   | 151.7   | 151.1    | 516       | 152.35     | -1.7555352 | -3.3755157 | 7.52E-05  |
| 100198    | A_55_P193510  | Hsp90        | 295.2   | 290.2   | 310.6   | 300.8   | 834.1   | 988.9   | 793.9   | 916.8    | 2989.775  | 881.275    | -1.7638722 | -3.396055  | 0.0010567 |
| 5246      | A_55_P208182  | Hsp90        | 276.7   | 276.7   | 276.7   | 276.7   | 276.7   | 276.7   | 276.7   | 276.7    | 276.7     | 276.7      | -1.7692724 | -3.4256454 | 8.793E-05 |
| 10050446  | A_55_P195821  | Gm13304      | 2067.1  | 3107.5  | 2489.6  | 2531.3  | 923.5   | 783.4   | 998.1   | 549.9    | 2723.875  | 813.725    | -1.7731048 | -3.417873  | 0.4893456 |
| 15414     | A_55_P232207  | Hoxb6        | 99.7    | 106.7   | 102.2   | 110.2   | 21.1    | 25.4    | 37.3    | 36.1     | 100.45    | 29.975     | -1.7781854 | -3.4299449 | 0.0639011 |
| 1862      | A_55_P282760  | Pif2         | 211.6   | 303     | 256.2   | 325.3   | 84.9    | 89.7    | 73.6    | 68.4     | 274.025   | 79.15      | -1.7807091 | -3.4339502 | 0.1082734 |
| 11474     | A_55_P195892  | Hsp90        | 1099.2  | 1128.5  | 1128.5  | 1128.5  | 1128.5  | 1128.5  | 1128.5  | 1128.5   | 1128.5    | 1128.5     | -1.7808821 | -3.4338365 | 0.0209850 |
| 16645     | A_55_P198627  | Erp1         | 1547    | 1573.4  | 1573.4  | 1573.4  | 1573.4  | 1573.4  | 1573.4  | 1573.4   | 1573.4    | 1573.4     | -1.7934271 | -3.466411  | 5.97E-05  |
| 26781     | A_55_P232862  | Hras         | 3521.5  | 3542.1  | 3538.6  | 3868.6  | 1333.8  | 1017.7  | 1011.6  | 1000     | 3617.7    | 1040.775   | -1.798167  | -3.4778807 | 2.68E-05  |
| 2239      | A_55_P217581  | Makp3        | 352.2   | 361.1   | 370.5   | 317.4   | 113.6   | 113.7   | 87.1    | 96       | 301.75    | 100.925    | -1.8004858 | -3.483371  | 0.0013633 |
| 14466     | A_55_P2107188 | Srsf1        | 400.3   | 367.4   | 327.99  | 327.99  | 1167.1  | 1157.6  | 1278.3  | 1138.1   | 367.875   | 118.275    | -1.8014077 | -3.4850328 | 0.0055462 |
| 1726      | A_55_P2155620 | Mef2c        | 876.7   | 812.7   | 885.9   | 1068.9  | 279.1   | 280.9   | 211.4   | 274      | 911.05    | 261.35     | -1.8037537 | -3.4912744 | 0.0019629 |
| 30948     | A_55_P2073308 | Bmi1         | 18618.7 | 15136   | 19682.2 | 15001.4 | 4909.3  | 4944.25 | 5254.5  | 4366.2   | 17108.575 | 4888.625   | -1.8057176 | -3.4960011 | 0.0092753 |
| 10621     | A_55_P2032424 | Trip10       | 10478.3 | 20849.8 | 22983.8 | 24229   | 6040.7  | 6621.4  | 5909.9  | 6399.2   | 21985     | 624.8      | -1.8060066 | -3.4987304 | 0.1191481 |
| 7756      | A_55_P2032424 | Trip10       | 5483.9  | 5483.9  | 5483.9  | 5483.9  | 5483.9  | 5483.9  | 5483.9  | 5483.9   | 5483.9    | 5483.9     | -1.8061293 | -3.4987304 | 0.1191481 |
| 10621     | A_55_P212485  | Nrip1        | 3759.4  | 3539.9  | 3899.6  | 3745.1  | 1007.1  | 1092.3  | 1077    | 1069.6   | 3735.95   | 1060.15    | -1.8107484 | -3.52384   | 1.29E-05  |
| 14478     | A_55_P2035932 | Fgf7         | 339.2   | 476.5   | 451.4   | 666.8   | 115.6   | 159.1   | 143.1   | 118.8    | 483.475   | 134.15     | -1.8204098 | -3.531815  | 0.0044788 |
| 6070      | A_55_P2002920 | Smc2         | 18086.6 | 17674.7 | 20062.9 | 21535.6 | 5875.1  | 6759.6  | 5052.6  | 4891.8   | 19343.25  | 5199.775   | -1.8233049 | -3.5389896 | 0.0061342 |
| 5286      | A_55_P210890  | Hsp90        | 2234.2  | 2234.2  | 2234.2  | 2234.2  | 2234.2  | 2234.2  | 2234.2  | 2234.2   | 2234.2    | 2234.2     | -1.8233049 | -3.5389896 | 0.0061342 |
| 20616     | A_55_P2102385 | Itih4        | 4345    | 4317.4  | 4385.6  | 4552.4  | 1186.8  | 1366.2  | 1248    | 1172.7   | 4400.1    | 1243.425   | -1.8255558 | -3.5444352 | 2.32E-05  |
| 11716     | A_55_P1985768 | Tlyh2        | 1011.2  | 867.7   | 1041.7  | 1003    | 260     | 342.3   | 272.9   | 278.1    | 1027      | 288.325    | -1.8272123 | -3.5490059 | 0.0034925 |
| 66108     | A_55_P2034784 | R430008038nk | 84.9    | 84.9    | 84.9    | 84.9    | 84.9    | 84.9    | 84.9    | 84.9     | 84.9      | 84.9       | -1.8272871 | -3.5498914 | 0.0397313 |
| 6273      | A_55_P2107571 | R430008038nk | 5718.8  | 5718.8  | 5718.8  | 5718.8  | 5718.8  | 5718.8  | 5718.8  | 5718.8   | 5718.8    | 5718.8     | -1.8272871 | -3.5498914 | 0.0397313 |
| 5064      | A_55_P2151769 | Pcdh12       | 323.5   | 245.5   | 416.7   | 218.7   | 86.6    | 82.1    | 84.4    | 75.1     | 311.8     | 23.025     | -1.8318396 | -3.559007  | 0.0017989 |
| 19590     | A_55_P1988202 | Rf023        | 757.2   | 816.9   | 696.1   | 859.3   | 191.1   | 247.2   | 238     | 201.7    | 782.375   | 219.5      | -1.8375278 | -3.5739707 | 0.0066888 |
| 16321     | A_55_P239750  | hhba         | 89.6    | 87.5    | 88.1    | 96.6    | 17.9    | 28.7    | 31.7    | 25       | 90.45     | 25.825     | -1.8391314 | -3.5779455 | 0.1697745 |
| 7630      | A_55_P2024524 | Itih4        | 89.8    | 88.8    | 88.8    | 88.8    | 88.8    | 88.8    | 88.8    | 88.8     | 88.8      | 88.8       | -1.840508  | -3.584608  | 0.0028522 |
| 100504362 | A_55_P2024524 | Gm1587       | 217.3   | 262.8   | 215.74  | 2336.1  | 691.5   | 693.3   | 818.3   | 460.6    | 2323.75   | 657.925    | -1.8460238 | -3.5950704 | 0.1910887 |
| 21789     | A_55_P2218223 | Pacs2        | 805.4   | 721.3   | 680.8   | 750.9   | 204.2   | 193.4   | 206.3   | 207.3    | 739.05    | 205.475    | -1.8462903 | -3.5957439 | 3.47E-05  |
| 10151     | A_55_P230257  | Atad3b330    | 3289.3  | 3508.3  | 4052.1  | 4005.3  | 920.4   | 1086    | 1014.9  | 1089.1   | 3713.75   | 1077.6     | -1.8513254 | -3.6088154 | 0.0022057 |
| 21328     | A_55_P193078  | Itih4        | 1170.4  | 1188.3  | 1283.4  | 1331.3  | 326.9   | 369.9   | 318.8   | 327.6    | 1220.2    | 335.375    | -1.8518788 | -3.6099996 | 2.78E-05  |
| 94068     | A_55_P2146663 | Tnfrsf1      | 102.8   | 115.5   | 91.2    | 105     | 31.3    | 31.6    | 26.8    | 24.8     | 103.725   | 28.775     | -1.853093  | -3.        |           |

|          |               |                   |         |         |         |         |         |         |         |         |           |            |            |            |            |          |
|----------|---------------|-------------------|---------|---------|---------|---------|---------|---------|---------|---------|-----------|------------|------------|------------|------------|----------|
| 13311    | A_55_P2112892 | Dab1              | 24.6    | 26.5    | 25      | 19.4    | 5.3     | 5.8     | 7.5     | 23.875  | 5.95      | -2.0107251 | -4.029847  | 0.0028672  |            |          |
| 39222    | A_55_P214464  | Sfk1              | 113     | 12.6    | 15.4    | 14.74   | 31      | 46.7    | 37.2    | 27.6    | 141.875   | 35.625     | -2.011368  | -4.031642  | 0.0140662  |          |
| 244867   | A_55_P215575  | Ring2b20          | 91.6    | 79.5    | 85.6    | 21.6    | 21.6    | 30.1    | 19.1    | 211.6   | 20.1      | -1.014712  | -4.031918  | 0.0030358  |            |          |
| 235283   | A_55_P2325116 | Grmb1b            | 1750.3  | 1444.9  | 1522.3  | 1796.3  | 409.4   | 453.6   | 355.3   | 391.1   | 1628.45   | 402.35     | -2.0165146 | -4.040512  | 0.0022471  |          |
| 979988   | A_55_P445841  | Dextor            | 1198.6  | 1055.5  | 984.5   | 1087.4  | 258.8   | 269     | 260     | 273.5   | 1078.95   | 265.325    | -2.0204573 | -4.057138  | 1.83E-05   |          |
| 1001456  | A_55_P2037454 | Etv5              | 2811.9  | 2473.7  | 2399.5  | 2494.9  | 620.8   | 756.7   | 581.7   | 558.2   | 2545      | 629.35     | -2.0211841 | -4.0647994 | 0.0026816  |          |
| 68813    | A_55_P212149  | Kn2               | 860.7   | 860.7   | 860.7   | 860.7   | 860.7   | 860.7   | 860.7   | 860.7   | 860.7     | 860.7      | 860.7      | 860.7      | 860.7      |          |
| 10004284 | A_55_P2119350 | 4732149C18IKR     | 11.6    | 12      | 9.4     | 14.4    | 2.1     | 4       | 3.1     | 2.6     | 11.85     | 2.95       | -2.030126  | -4.0844051 | 0.0426204  |          |
| 12787    | A_55_P210736  | Bnip3             | 528     | 530.7   | 612.1   | 490     | 129.2   | 131.7   | 139.9   | 126.4   | 540.2     | 131.8      | -2.0314324 | -4.0881055 | 3.44E-05   |          |
| 217365   | A_55_P2030647 | Dusp13            | 15620.5 | 13431.1 | 17236.6 | 15212.4 | 3718.9  | 3436.5  | 4451.2  | 3564.5  | 15375.15  | 3763.025   | -2.031825  | -4.0930675 | 0.0034009  |          |
| 30587    | A_55_P202951  | PhyC              | 151.1   | 116.8   | 132.8   | 85.6    | 31.8    | 34.1    | 30.1    | 31.1    | 13.5      | -2.031944  | -4.093821  | 0.0021636  |            |          |
| 20183    | A_55_P513131  | Nrg3              | 13056.7 | 12308.6 | 10885.6 | 14005.6 | 3203    | 3144.5  | 2948.3  | 2911.6  | 12564.125 | 3051.85    | -2.03661   | -4.1029485 | 6.09E-05   |          |
| 29811    | A_55_P176352  | Nrg2              | 64942.5 | 59715.1 | 57627.7 | 57705.8 | 14257.6 | 15467.7 | 13838   | 14625.8 | 59997.75  | 14547.275  | -2.0436492 | -4.1237896 | 9.56E-06   |          |
| 69791    | A_55_P246924  | Tpp3              | 3774    | 363.7   | 435.4   | 290.5   | 94.1    | 107     | 82.4    | 72.3    | 366.75    | 88.95      | -2.0442654 | -4.124632  | 0.0046645  |          |
| 20798    | A_55_P473536  | Sod2              | 301.4   | 322.3   | 357     | 396     | 85.5    | 85.5    | 85.5    | 85.5    | 366.3     | 86.3       | -2.045899  | -4.1292647 | 0.0020306  |          |
| 164045   | A_55_P1977925 | ngam              | 23.5    | 28.4    | 26.1    | 26.6    | 8       | 5.8     | 6.7     | 5.2     | 26.15     | 6.4        | -2.0461774 | -4.1310119 | 0.0014534  |          |
| 13628    | A_55_P485862  | Erf1a2            | 3504.5  | 2530.3  | 3451.8  | 2838.2  | 674.6   | 743.3   | 773.7   | 762.2   | 3081.7    | 739.4      | -2.0476325 | -4.1324666 | 0.0045079  |          |
| 710253   | A_55_P1953356 | Tripb             | 994.6   | 708     | 888     | 630.1   | 218.4   | 176.4   | 169.5   | 209.5   | 805.375   | 192.9      | -2.0491423 | -4.1338966 | 0.0040528  |          |
| 208750   | A_55_P1930954 | Pnc2              | 1518.5  | 1500.8  | 1500.8  | 1500.8  | 1500.8  | 1500.8  | 1500.8  | 1500.8  | 1500.8    | 1500.8     | 1500.8     | 1500.8     | 1500.8     |          |
| 70556    | A_55_P156438  | Sca25a3           | 2751    | 3132.1  | 3327.8  | 3053.6  | 881.5   | 667.1   | 693.7   | 710.7   | 3066.125  | 738.75     | -2.0557982 | -4.1603909 | 0.0020289  |          |
| 231470   | A_55_P383270  | Frax1             | 106     | 111.4   | 81.2    | 111.1   | 23.1    | 28.3    | 23      | 23.5    | 102.425   | 24.475     | -2.0589867 | -4.1609353 | 0.0002466  |          |
| 19885    | A_55_P2051494 | Rorc              | 3732.9  | 3288.6  | 3741.1  | 4563.7  | 801.1   | 889.7   | 1014.6  | 947.6   | 3824.825  | 913.25     | -2.0615702 | -4.1744039 | 0.0043988  |          |
| 23927    | A_55_P1979814 | Aoc8              | 691.6   | 776.8   | 771.9   | 1224.4  | 230.3   | 180.9   | 174.5   | 217.2   | 866.25    | 203.225    | -2.0630228 | -4.1786099 | 0.0147281  |          |
| 1001456  | A_55_P2057446 | Cdc134            | 2594    | 2542.5  | 3068.3  | 3823.6  | 593.5   | 788.1   | 753     | 720.4   | 3007.48   | 713.75     | -2.0631088 | -4.178859  | 0.0020346  |          |
| 238161   | A_55_P2350022 | Akap6             | 263     | 289.2   | 290.9   | 277.3   | 64      | 66.1    | 62.8    | 61.8    | 280.2     | 67.55      | -2.0643431 | -4.183449  | 3.57E-05   |          |
| 381269   | A_55_P2096917 | Nrg4              | 2626.2  | 2724.2  | 2734.1  | 3280.9  | 787.5   | 714.8   | 623.6   | 588.3   | 2841.35   | 678.15     | -2.0699217 | -4.196389  | 0.0037715  |          |
| 67598    | A_55_P1983286 | 4732149C141F08IKR | 46.2    | 46.2    | 46.2    | 46.2    | 46.2    | 46.2    | 46.2    | 46.2    | 46.2      | 46.2       | 46.2       | 46.2       | 46.2       |          |
| 11317    | A_55_P26660   | Radd5a4           | 1230.7  | 1373.8  | 1481    | 1101.3  | 385.5   | 290.5   | 248.8   | 260.8   | 1296.7    | 307.9      | -2.0807983 | -4.2304124 | 0.0017351  |          |
| 56376    | A_55_P2001148 | Pdlim5            | 7045.3  | 6414.4  | 6068.2  | 5131.8  | 1422.3  | 1601.9  | 1493.6  | 1439.6  | 6289.925  | 1472.725   | -2.0842089 | -4.2400252 | 0.0023466  |          |
| 360013   | A_55_P315822  | Myo18a            | 28595.1 | 25773.7 | 28469.7 | 23766.3 | 688.6   | 6622.2  | 6236.5  | 6025.9  | 26651.1   | 6268.3     | -2.0847163 | -4.2419167 | 2.21E-05   |          |
| 14938    | A_55_P2026315 | Gys1              | 244.5   | 248.7   | 284.9   | 208.1   | 619.8   | 619.8   | 558.4   | 2177.55 | 4825.5    | 511.575    | -2.0882123 | -4.255184  | 0.0020346  |          |
| 1001116  | A_55_P198963  | Soc1a1            | 3472.8  | 3801.7  | 3867.5  | 3757.5  | 895.3   | 729.7   | 790.8   | 3462.9  | 809.45    | -2.0916277 | -4.2622858 | 0.0020346  |            |          |
| 15482    | A_55_P340747  | Hspal1            | 272.2   | 279.7   | 242.2   | 248.8   | 78.4    | 61.9    | 60.7    | 52.9    | 268.725   | 63.475     | -2.0951794 | -4.2727928 | 0.0022406  |          |
| 71839    | A_55_P189361  | Ogln1             | 1509.9  | 1373.7  | 1629.8  | 1255.1  | 323.1   | 318.8   | 342     | 360.9   | 1441.975  | 336.2      | -2.0954679 | -4.2736474 | 7.46E-05   |          |
| 80290    | A_55_P2027392 | Gpr146            | 4166.4  | 3413.2  | 4077.3  | 3742.5  | 967.3   | 851.7   | 803.4   | 982.3   | 3849.85   | 901.175    | -2.0956661 | -4.2742343 | 9.77E-05   |          |
| 71839    | A_55_P2048729 | Gpr146            | 4166.4  | 3413.2  | 4077.3  | 3742.5  | 967.3   | 851.7   | 803.4   | 982.3   | 3849.85   | 901.175    | -2.0956661 | -4.2742343 | 9.77E-05   |          |
| 18551    | A_55_P1972991 | Nrg1              | 707.2   | 872.6   | 769.6   | 869.8   | 164.9   | 233.6   | 181.8   | 178.2   | 799.125   | 187.625    | -2.0984557 | -4.2820572 | 0.0008727  |          |
| 216614   | A_55_P2048767 | Femf1             | 353     | 414.1   | 468.9   | 281.6   | 81.1    | 103.2   | 94.9    | 69.6    | 378.725   | 87.7       | -2.1007388 | -4.2894235 | 0.0014451  |          |
| 23927    | A_55_P2137706 | Tmpo              | 3673.5  | 3699.8  | 4224.9  | 4059.8  | 820.4   | 986.9   | 961.9   | 879.6   | 3914.5    | 913.2      | -2.1026887 | -4.2930313 | 3.48E-05   |          |
| 221791   | A_55_P1426247 | Pcp1              | 1139.5  | 1204.8  | 1048.4  | 1726.9  | 270.9   | 316.1   | 193.3   | 351.8   | 376.4     | 1542.39    | 371.05     | -2.1052899 | -4.3029609 | 1.33E-05 |
| 235320   | A_55_P2024155 | Dzbtb16           | 14531.7 | 13855.6 | 13949   | 13652.9 | 3515.9  | 3328.4  | 3185.2  | 2954.6  | 13997.3   | 3246.025   | -2.1109211 | -4.3196701 | 9.07E-06   |          |
| 56233    | A_55_P1982727 | Dnajb5            | 12371   | 11787.9 | 12013.9 | 12938.7 | 2398.7  | 3101.4  | 2742.2  | 2543.8  | 12210.75  | 2832.775   | -2.1111605 | -4.326781  | 1.65E-05   |          |
| 668212   | A_55_P1956414 | Efrb              | 843.5   | 751.1   | 591.1   | 790.4   | 146.4   | 257.3   | 137.7   | 161.5   | 744.025   | 175.25     | -2.1162371 | -4.3356164 | 0.0014956  |          |
| 72729    | A_55_P2114348 | 4732149C15C15IKR  | 118.9   | 118.9   | 118.9   | 118.9   | 118.9   | 118.9   | 118.9   | 118.9   | 118.9     | 118.9      | 118.9      | 118.9      | 118.9      |          |
| 10001488 | A_55_P2005103 | Gmi11937          | 23.14   | 19.5    | 20.5    | 20.6    | 7.6     | 34.8    | 35.6    | 30.5    | 18.45     | 14.5       | -2.1207869 | -4.3602833 | 0.0029046  |          |
| 70892    | A_55_P2057424 | Tu17              | 685.9   | 597.5   | 582.3   | 514.2   | 128.4   | 151.7   | 129.7   | 125.1   | 584.975   | 133.725    | -2.1252339 | -4.3627833 | 0.0016615  |          |
| 68855    | A_55_P153423  | pndc1             | 2463.8  | 2655.1  | 2610.9  | 2183.9  | 580.7   | 658.7   | 605.5   | 484.2   | 2488.4    | 572.275    | -2.1253561 | -4.363501  | 0.0027655  |          |
| 12450    | A_55_P161803  | lcy1              | 11456.1 | 10988.1 | 10988.1 | 10988.1 | 10988.1 | 10988.1 | 10988.1 | 10988.1 | 10988.1   | 10988.1    | 10988.1    | 10988.1    | 10988.1    |          |
| 20410    | A_55_P278373  | Sorbs3            | 143.6   | 125.2   | 126.8   | 87.7    | 34.4    | 32.2    | 19.5    | 24.9    | 120.825   | 27.75      | -2.1345293 | -4.3909383 | 0.0038356  |          |
| 235884   | A_55_P1993836 | Dusp7             | 549.9   | 623.6   | 529.2   | 519.3   | 110.2   | 114.5   | 141.7   | 139.8   | 555.5     | 126.55     | -2.1396239 | -4.4064715 | 0.0019322  |          |
| 21916    | A_55_P297609  | Tfod1             | 2241.5  | 2110.1  | 2089    | 2359.1  | 477.9   | 552.7   | 539.2   | 547.3   | 2349.925  | 529.275    | -2.1471097 | -4.4239396 | 5.29E-05   |          |
| 328282   | A_55_P1408527 | Myo18a            | 2463.8  | 2655.1  | 2610.9  | 2183.9  | 580.7   | 658.7   | 605.5   | 484.2   | 2488.4    | 572.275    | -2.1491026 | -4.4254774 | 0.0021878  |          |
| 14177    | A_55_P2073167 | gmi1              | 554     | 56.6    | 53.3    | 51.7    | 47.9    | 127.4   | 118.3   | 114.9   | 541.475   | 122.05     | -2.1501795 | -4.4388302 | 4.65E-06   |          |
| 16531    | A_55_P2378486 | Kcnma1            | 928.3   | 1186.2  | 920.3   | 1005.4  | 207.2   | 256.6   | 204     | 237.2   | 1010.15   | 225.775    | -2.1601543 | -4.4696265 | 0.0020137  |          |
| 20488    | A_55_P1949537 | Phd1              | 4389.4  | 3512.7  | 3683.4  | 3270.5  | 823.7   | 584.1   | 856.3   | 838.3   | 3714      | 862.975    | -2.1606558 | -4.4711805 | 6.73E-05   |          |
| 70788    | A_55_P2025125 | Phf1              | 1138.9  | 1184.7  | 1214.2  | 1261.9  | 376.5   | 316.3   | 196.7   | 116.8   | 604.5     | 118.975    | -2.1630847 | -4.4732109 | 0.0020346  |          |
| 18761    | A_55_P275287  | Pirk2             | 2451    | 2416.1  | 2389.8  | 2844.3  | 586.5   | 565.7   | 549.1   | 546.6   | 2523.3    | 561.975    | -2.164751  | -4.4838903 | 1.12E-05   |          |
| 14403    | A_55_P149623  | Gabrd             | 31.9    | 53.3    | 54.6    | 65.4    | 13.4    | 11.6    | 10.2    | 9.3     | 51.3      | 11.125     | -2.1714135 | -4.5056452 | 0.0020346  |          |
| 18011    | A_55_P2023692 | Neur1a            | 39799.7 | 34922.4 | 36645.3 | 34922.5 | 8479.9  | 8038    | 8035.6  | 7733.1  | 36572.475 | 8071.65    | -2.1781578 | -4.5268823 | 5.62E-06   |          |
| 12554    | A_55_P141826  | Phf1              | 1138.9  | 1184.7  | 1214.2  | 1261.9  | 376.5   | 316.3   | 196.7   | 116.8   | 604.5     | 118.975    | -2.1781578 | -4.5268823 | 5.62E-06   |          |
| 10001488 | A_55_P2418026 | 4930577N17IKR     | 15.64   | 23.7    | 21.85   | 20.74   | 39.7    | 41.1    | 52.2    | 46.6    | 204.975   | 44.1       | -2.1816122 | -4.5366024 | 0.0015827  |          |
| 66447    | A_55_P215077  | Mgst3             | 7914.2  | 7063.1  | 7243    | 5575.4  | 1554.9  | 1702    | 1619.3  |         |           |            |            |            |            |          |

|           |               |                            |          |         |          |          |        |         |         |         |           |            |            |            |            |           |
|-----------|---------------|----------------------------|----------|---------|----------|----------|--------|---------|---------|---------|-----------|------------|------------|------------|------------|-----------|
| 74940     | A5_1_P122141  | Manstr                     | 269.2    | 212.7   | 241.9    | 274.1    | 42.9   | 44.3    | 50.5    | 249.475 | 46.65     | -2.4149804 | -5.3332424 | 4.71032    |            |           |
| 12818     | A5_1_P212476  | Coll1a4                    | 48.9     | 56.5    | 75.8     | 50.8     | 12.8   | 14.8    | 100.9   | 58      | 580.125   | 11.13      | -2.418555  | -5.346327  | 0.0472335  |           |
| 9396      | A5_1_P115442  | C-lysozyme domain family 1 | 42.2     | 46.1    | 51.2     | 35.4     | 44.5   | 36.3    | 48      | 5       | 228.05    | 43.75      | -2.450826  | -5.302899  | 0.0294717  |           |
| 64101     | A5_1_P108183  | Tnfrsd                     | 238      | 341.1   | 155.7    | 225.3    | 32.9   | 54.8    | 46.8    | 40.4    | 239.3     | 43.725     | -2.4219168 | -5.3588253 | 0.04146569 |           |
| 110880    | A5_1_P2010454 | Scn4a                      | 298      | 290.9   | 282.4    | 305      | 51.4   | 47.7    | 64.5    | 57.2    | 294.075   | 55.2       | -2.4222564 | -5.3000888 | 3.29E-05   |           |
| 24373     | A5_1_P195292  | AhR5703                    | 14.7     | 12.2    | 18.1     | 12.5     | 2.2    | 2.6     | 3.3     | 26      | 14.375    | 2.975      | -2.4228337 | -5.3623231 | 0.0151228  |           |
| 32091     | A5_1_P2025513 | Capn3                      | 297      | 297     | 348      | 18.7     | 9.8    | 1.8     | 2       | 1       | 15.85     | 1.24       | -2.423994  | -5.348055  | 0.027919   |           |
| 51951     | A5_1_P211387  | Tctd1                      | 19551.2  | 20910   | 21863.1  | 22704.9  | 4443.7 | 4109.75 | 3849.8  | 3399.8  | 21257.3   | 360.75     | -2.4242003 | -5.3397977 | 5.25E-05   |           |
| 39021     | A5_1_P1970755 | Hdac9                      | 16.05    | 120.7   | 122.9    | 198.3    | 34.6   | 32.9    | 25.3    | 19.3    | 150.56    | 18.025     | -2.4257008 | -5.3985455 | 0.02251354 |           |
| 79284     | A5_1_P233436  | Hnf1b50                    | 786.45   | 597.1   | 795.67   | 749.3    | 1081   | 1654.9  | 1048.5  | 1751.8  | 733.9     | 138.55     | -2.4333778 | -5.3632321 | 0.0096949  |           |
| 16981     | A5_1_P197141  | Lymphocyte-specific 1      | 6241.7   | 6298    | 6633.7   | 5473.5   | 1038.5 | 1396.4  | 1175.8  | 1000.4  | 616.75    | 61.75      | -2.4457867 | -5.3588474 | 0.0058271  |           |
| 61926     | A5_1_P428735  | Ubp2p                      | 90.7     | 90.6    | 98.3     | 123      | 20.5   | 17.8    | 17.5    | 18.1    | 100.65    | 18.475     | -2.4368864 | -5.4147188 | 8.51E-05   |           |
| 17384     | A5_1_P451075  | Alp2a2                     | 3076.1   | 4682.7  | 2947.6   | 4409.6   | 703    | 685     | 682.5   | 669.1   | 379.7     | 680.775    | -2.4422102 | -5.4347369 | 0.0018771  |           |
| 229776    | A5_1_P201716  | Cdc14a                     | 1371.8   | 1723.1  | 1394.4   | 1016     | 233    | 268.2   | 247.7   | 244.3   | 1375.875  | 248.3      | -2.4472348 | -5.4536978 | 0.0019772  |           |
| 15743     | A5_1_P477326  | Pnc1                       | 942.2    | 873.3   | 1156.2   | 937.8    | 147.6  | 191.6   | 196.2   | 171.9   | 99.75     | 122.75     | -2.4635609 | -5.3175466 | 0.0046616  |           |
| 72472     | A5_1_P257917  | Slc16a10                   | 139.5    | 124.4   | 120.3    | 138.3    | 23.9   | 23.6    | 23.6    | 23.6    | 23.7      | 23.7       | -2.4594826 | -5.5001944 | 2.94E-06   |           |
| 320379    | A5_1_P2331709 | De303020808k               | 191      | 138.5   | 197.4    | 168.6    | 35.5   | 28.1    | 30.1    | 31.1    | 173.875   | 31.4       | -2.4610471 | -5.5061622 | 0.0021006  |           |
| 65112     | A5_1_P1959174 | Pmpa1                      | 1298.8   | 1142.6  | 1284.2   | 1714.7   | 190.8  | 292.9   | 264     | 239.7   | 1360.075  | 246.85     | -2.4629502 | -5.5134305 | 0.0015061  |           |
| 70228     | A5_1_P213708  | Arctc                      | 1641.5   | 1441    | 1399.3   | 1192.5   | 243.7  | 254.7   | 252.4   | 250.7   | 1410.875  | 252.875    | -2.4513961 | -5.5450818 | 2.64E-07   |           |
| 77550     | A5_1_P242765  | Agl                        | 41908.2  | 38887   | 33818.9  | 28828.8  | 5194.6 | 6993.7  | 7038.9  | 6635.9  | 35860.725 | 6465.75    | -2.4677157 | -5.5316722 | 0.0055584  |           |
| 378431    | A5_1_P3153191 | Txnib                      | 21497.2  | 22227.7 | 23583    | 23353.3  | 4098.2 | 3927.7  | 4552.8  | 4528.7  | 38255.06  | 4101.125   | -2.4686007 | -5.526557  | 4.08E-06   |           |
| 226594    | A5_1_P3711091 | Rcd1                       | 9153.5   | 9371.7  | 8791.2   | 9605.6   | 1850.1 | 1738.4  | 1498.7  | 1594.1  | 9230.5    | 1670.325   | -2.4701881 | -5.5411609 | 6.74E-06   |           |
| 26399     | A5_1_P251093  | Nap2b                      | 1641.5   | 1441    | 1399.3   | 1192.5   | 243.7  | 254.7   | 252.4   | 250.7   | 1410.875  | 252.875    | -2.4513961 | -5.5450818 | 2.64E-07   |           |
| 125391    | A5_1_P2010066 | Capn3                      | 12080.3  | 12041.4 | 14594.2  | 16557.5  | 2328.5 | 2387.5  | 2505    | 2765    | 2899.4    | 1381.35    | 2472.025   | -2.4786665 | -5.5285437 | 0.0007871 |
| 12451     | A5_1_P246854  | Actr1                      | 184692.8 | 17761.7 | 166091.6 | 157125.5 | 2847.8 | 34589.7 | 39330.4 | 22288.8 | 169572.9  | 31113.425  | -2.4789762 | -5.559983  | 0.00196335 |           |
| 14243     | A5_1_P111562  | Cndr1                      | 291.5    | 332.8   | 300.7    | 279.9    | 46.3   | 72.8    | 56.5    | 44.7    | 301.225   | 55.075     | -2.4764059 | -5.5650993 | 0.0092961  |           |
| 68019     | A5_1_P216595  | Ucp1                       | 2890.3   | 3245.8  | 4068.7   | 3293.6   | 629.2  | 584.57  | 572.5   | 528.8   | 2328.8    | 584.57     | -2.4804178 | -5.5023967 | 0.0002967  |           |
| 23796     | A5_1_P25752   | Ucp1                       | 94.5     | 90.2    | 148.2    | 67.2     | 14.5   | 16.6    | 14.9    | 19      | 95.025    | 16.25      | -2.4848937 | -5.591705  | 0.0250492  |           |
| 17045     | A5_1_P188590  | Xpnp2p                     | 120.5    | 103.5   | 109.9    | 131.2    | 19.7   | 23.3    | 25.7    | 19.5    | 22.05     | -2.4905116 | -5.619718  | 9.92E-05   |            |           |
| 14245     | A5_1_P2083474 | Lipn1                      | 148.1    | 133.8   | 203      | 187.1    | 32.6   | 23.1    | 33.6    | 29.8    | 168       | 29.775     | -2.4907783 | -5.620108  | 0.0170897  |           |
| 325526    | A5_1_P202223  | Ucp2                       | 92.7     | 96.5    | 124.9    | 36.2     | 46.1   | 39.7    | 39.7    | 39.7    | 235.725   | 39.85      | -2.5387487 | -5.8027979 | 1.38E-05   |           |
| 74741     | A5_1_P210247  | Cact1                      | 490.7    | 460.2   | 466.4    | 505.6    | 80.4   | 79      | 80.9    | 101.7   | 480.75    | 85.475     | -2.4985900 | -5.6513308 | 1.848E-05  |           |
| 381339    | A5_1_P1961640 | Tmem182                    | 495.8    | 687.5   | 639.6    | 852.9    | 148.6  | 151     | 75.7    | 106.6   | 668.95    | 120.475    | -2.5010273 | -5.6680838 | 0.0376384  |           |
| 19599     | A5_1_P139570  | Hic3                       | 327      | 210.2   | 414.5    | 329.9    | 47     | 64.4    | 60.1    | 49.5    | 320.4     | 55.25      | -2.5069129 | -5.684025  | 0.0097981  |           |
| 23544     | A5_1_P205378  | Ppp2r3a                    | 102.2    | 91.5    | 118.5    | 102.6    | 18     | 19.1    | 16.9    | 18.7    | 103.7     | 18.175     | -2.5078095 | -5.6875589 | 1.28E-05   |           |
| 80981     | A5_1_P213708  | Arctc                      | 1641.5   | 1441    | 1399.3   | 1192.5   | 243.7  | 254.7   | 252.4   | 250.7   | 1410.875  | 252.875    | -2.4513961 | -5.5450818 | 2.64E-07   |           |
| 16840     | A5_1_P13547   | Jup                        | 53.7     | 57.5    | 63.9     | 47.1     | 10.4   | 9.4     | 7.9     | 5.8     | 12.4      | 57.775     | -2.5133371 | -5.7093918 | 0.0264605  |           |
| 68041     | A5_1_P2041723 | Mtd1p1                     | 4908.5   | 6051.6  | 4804.6   | 4275.7   | 827.1  | 964.2   | 786.2   | 912.2   | 5010.1    | 872.425    | -2.5148119 | -5.7152312 | 9.70E-05   |           |
| 18854     | A5_1_P293269  | Pde7a                      | 1238.8   | 1268.8  | 1519     | 996.1    | 226.7  | 241.8   | 202.9   | 197.8   | 1255.2    | 217.3      | -2.5189944 | -5.718242  | 0.0032325  |           |
| 18600     | A5_1_P2091185 | Ucp1                       | 491.4    | 476.4   | 586.6    | 495.3    | 97.2   | 89.1    | 82.6    | 81.6    | 476.35    | 97.205     | -2.520398  | -5.720461  | 0.0224264  |           |
| 217830    | A5_1_P2031999 | 9306170030k                | 1435.5   | 1750.1  | 1581     | 2588.4   | 334.7  | 333.4   | 319.2   | 317.7   | 1922.625  | 326.25     | -2.5263425 | -5.7102297 | 0.0069227  |           |
| 74182     | A5_1_P1976351 | Gcpd1                      | 4085.3   | 3780.1  | 5225.5   | 3988.7   | 691.2  | 685.3   | 892.9   | 690.3   | 4269.9    | 739.925    | -2.5266264 | -5.7622265 | 0.0010627  |           |
| 58522     | A5_1_P2035139 | Tm6s4                      | 11774.6  | 11645.3 | 12308    | 9970     | 2239.2 | 2070.6  | 1852.6  | 1898.7  | 11649.475 | 215.275    | -2.528155  | -5.768332  | 3.32E-05   |           |
| 12043     | A5_1_P212626  | Ucp1                       | 92.7     | 96.5    | 124.9    | 36.2     | 46.1   | 39.7    | 39.7    | 39.7    | 235.725   | 39.85      | -2.5387487 | -5.8027979 | 1.38E-05   |           |
| 39250     | A5_1_P203948  | Plazg4e                    | 544.4    | 395.1   | 511.6    | 424      | 65.2   | 94.3    | 97.4    | 69.4    | 694.775   | 101.75     | -2.5331727 | -5.7884233 | 0.00137691 |           |
| 74116     | A5_1_P1999102 | P16                        | 7872.2   | 9162.8  | 10342.4  | 5592.9   | 1419.1 | 1732.2  | 1518.9  | 988.8   | 8242.575  | 1414.75    | -2.5355729 | -5.7980707 | 0.0002967  |           |
| 170952    | A5_1_P1962219 | Prm1                       | 213.3    | 214.8   | 201.8    | 195.3    | 41     | 32.7    | 36.9    | 35.8    | 212.2     | 36.7       | -2.5387487 | -5.8027979 | 1.38E-05   |           |
| 21501     | A5_1_P204425  | Ucp1                       | 92.7     | 96.5    | 124.9    | 36.2     | 46.1   | 39.7    | 39.7    | 39.7    | 235.725   | 39.85      | -2.5387487 | -5.8027979 | 1.38E-05   |           |
| 17929     | A5_1_P302520  | Myom1                      | 37187.9  | 30951.6 | 38339.7  | 33867.4  | 6226.3 | 6298.2  | 6408.2  | 5193.3  | 35986.65  | 6015.1     | -2.5403526 | -5.8137118 | 2.24E-05   |           |
| 208372    | A5_1_P1960815 | Adb18                      | 16       | 11.6    | 11.6     | 11.6     | 2.5    | 2.5     | 2.7     | 2.4     | 14.05     | 2.4        | -2.5455112 | -5.8381497 | 0.009095   |           |
| 16405     | A5_1_P195679  | Smp                        | 14624.4  | 4654.6  | 4877.9   | 4077.7   | 789.6  | 1013.2  | 693.1   | 681.9   | 4589.65   | 794.5      | -2.5457045 | -5.8393818 | 0.0002326  |           |
| 11413     | A5_1_P126198  | Ucp1                       | 92.7     | 96.5    | 124.9    | 36.2     | 46.1   | 39.7    | 39.7    | 39.7    | 235.725   | 39.85      | -2.5387487 | -5.8027979 | 1.38E-05   |           |
| 66146     | A5_1_P2124146 | Plp4                       | 3782.4   | 14004.7 | 12263.8  | 8087.4   | 875.1  | 1953.4  | 2197    | 1959    | 11994.825 | 1982.85    | -2.5672255 | -5.9266855 | 0.00157414 |           |
| 74116     | A5_1_P2104884 | 543042512k                 | 41.2     | 50.2    | 46.5     | 56.6     | 8      | 8.4     | 7.9     | 8.3     | 48.625    | 8.15       | -2.5676809 | -5.9285565 | 2.17E-05   |           |
| 16184     | A5_1_P213060  | Musk                       | 1822.3   | 1599.9  | 1657.6   | 1044.5   | 221.1  | 270.6   | 271     | 239.4   | 1516.075  | 250.525    | -2.5724103 | -5.849032  | 0.0015076  |           |
| 15378     | A5_1_P212028  | Ucp1                       | 92.7     | 96.5    | 124.9    | 36.2     | 46.1   | 39.7    | 39.7    | 39.7    | 235.725   | 39.85      | -2.5387487 | -5.8027979 | 1.38E-05   |           |
| 100042834 | A5_1_P197240  | Gm405                      | 24172.8  | 22726.7 | 29005.3  | 23137.7  | 3640.5 | 4189.7  | 4113.6  | 3864.5  | 2330.175  | 392.075    | -2.5756164 | -5.9126564 | 1.44E-06   |           |
| 100023322 | A5_1_P2035311 | 31110099030k               | 93.7     | 62.2    | 84.6     | 85.8     | 14.6   | 12.9    | 12.8    | 13.8    | 81.575    | 13.525     | -2.5781119 | -5.9271565 | 0.0010482  |           |
| 51801     | A5_1_P194866  | Ramp1                      | 1046.9   | 1136.9  | 890      | 934      | 175.1  | 186.3   | 165.8   | 138.5   | 1001.95   | 166.425    | -2.5917941 | -6.0284791 | 6.92E-05   |           |
| 27878     | A5_1_P2139903 | 9402530930k                | 4325.9   | 3794.4  | 4453     | 3478     | 629    | 518     | 670.1   | 558.5   | 3478.5    | 670.1      | -2.5947079 | -6.0284791 | 6.92E-05   |           |
| 54613     | A5_1_P218133  | Sl3g4e                     | 3589.8   | 3799.1  | 3109.4   | 3140.4   | 558.8  | 607.4   | 582     | 522     | 3459.175  | 567.025    | -2.6043288 | -6.0857406 | 1.07E-05   |           |
| 16367     | A5_1_P175242  | Irs1                       | 4587.8   | 4909.9  | 5103.3   | 6808.5   | 841.7  | 994.7   | 789.3   | 847.1   | 5331.65   | 886.2      | -2.6119581 | -          |            |           |

|        |                |               |                                                              |              |               |         |         |         |         |         |         |         |          |            |            |            |            |           |
|--------|----------------|---------------|--------------------------------------------------------------|--------------|---------------|---------|---------|---------|---------|---------|---------|---------|----------|------------|------------|------------|------------|-----------|
| 115601 | A5_52_P0200303 | Adsl1         | adenylosuccinate synthetase                                  | NM_007421    | 91122.3       | 88056.6 | 87344.4 | 88866.1 | 11296.3 | 11180.5 | 12298.8 | 11266.9 | 88869.85 | 11661.125  | -2.9324127 | -7.63386   | 5.98E-07   |           |
| 215303 | A5_52_P0200331 | Cams1g        | calcium/calmodulin-dependent                                 | NM_144817    | 95            | 124.5   | 57.6    | 130.3   | 11.9    | 12.1    | 12.2    | 12.2    | 101.85   | 127        | -2.9363596 | -7.6547732 | 0.00784194 |           |
| 76286  | A5_52_P017197  | Wdr32         | Wdr32 homolog 2                                              | NM_004157    | 28.1          | 28.1    | 28.1    | 28.1    | 28.1    | 28.1    | 28.1    | 28.1    | 28.1     | 4.25       | 2.3        | 3.2        | 5.5E-05    |           |
| 78321  | A5_52_P0205282 | Ankrk23       | ankyrin repeat domain 23                                     | NM_153502    | 2987.9        | 2938.1  | 3345.6  | 3915.5  | 509.3   | 482.6   | 411.2   | 322.3   | 3296.75  | 431.35     | -2.9464003 | -7.7082336 | 0.00288447 |           |
| 17866  | A5_52_P108346  | Nr6a          | myelocytomatous oncogene                                     | NM_010849    | 520.8         | 778.2   | 754.3   | 320.5   | 76.7    | 80.7    | 80.3    | 55.2    | 593.84   | 73.225     | -2.9505455 | -7.7301432 | 0.027884   |           |
| 394248 | A5_52_P273496  | CCO26762      | cDNA sequence BC027672                                       | BC029791     | 1800.4        | 1606.6  | 1815.9  | 1745.4  | 240.2   | 223.1   | 227     | 209.7   | 1742.075 | 225        | -2.9528343 | -7.742687  | 7.69E-07   |           |
| 21991  | A5_52_P198424  | Nrl1          | retinol dehydrogenase 1                                      | NM_009415    | 1792.0        | 1762.9  | 2043.2  | 1854.0  | 215.9   | 219.2   | 193.7   | 246.8   | 1780.2   | 2280.875   | -2.9576347 | -7.7612163 | 0.0002915  |           |
| 76187  | A5_52_P116264  | Ahd1f1        | alpha-ketohydrogenase, iron                                  | NM_175236    | 51.7          | 57.6    | 76.6    | 51.3    | 8.4     | 8.4     | 5.2     | 8.5     | 59.3     | 7.625      | -2.9683739 | -7.8265359 | 0.00139419 |           |
| 20975  | A5_52_P2124026 | Synj2         | synaptotagmin 2                                              | NM_001113353 | 1445          | 1279.7  | 1319.3  | 1132.4  | 14.2    | 21.9    | 21.6    | 177.6   | 134.4    | 1294.1     | 167.725    | -2.9689145 | -7.8296604 | 0.0002941 |
| 131811 | A5_52_P342387  | ApoH          | apolipoprotein H                                             | NM_013475    | 18.9          | 13.7    | 23.2    | 19.1    | 1.9     | 2.3     | 2.9     | 2.4     | 18.275   | 2.375      | -2.9703128 | -7.8370616 | 0.00062962 |           |
| 75444  | A5_52_P488559  | IRX1          | IRX1 homolog 1 (N103)                                        | NM_029290    | 16.8          | 26.1    | 16.6    | 16.4    | 2.1     | 2.4     | 2.1     | 2.4     | 16.8     | 2.1        | -2.9717878 | -7.8409734 | 0.0009784  |           |
| 69731  | A5_52_P109369  | Fbox32        | F-box protein 32                                             | NM_026346    | 2263.1        | 2700.5  | 3140.21 | 2706.5  | 3790    | 3290.7  | 3473.5  | 3161.2  | 2708.65  | 3418.85    | -2.9762489 | -7.8693739 | 1.28E-05   |           |
| 11555  | A5_52_P0203218 | Dnae11        | deoxyribonuclease I-like 1                                   | NM_027109    | 2234.6        | 2202    | 2427.4  | 2080.7  | 293.6   | 269.9   | 287.4   | 282.2   | 2236.175 | 283.275    | -2.992423  | -7.8857191 | 5.78E-07   |           |
| 11660  | A5_52_P215827  | Angpt1        | angiopoietin 1                                               | NM_009640    | 629           | 888     | 630.1   | 95.7    | 94.3    | 113.5   | 78.2    | 101.2   | 774.9    | 96.6       | -2.9876337 | -7.9317196 | 0.0005296  |           |
| 15541  | A5_52_P123855  | Nrl3          | retinol dehydrogenase 3                                      | NM_029290    | 16.8          | 26.1    | 16.6    | 16.4    | 2.1     | 2.4     | 2.1     | 2.4     | 16.8     | 2.1        | -2.9887989 | -7.934825  | 0.0035786  |           |
| 20894  | A5_52_P227253  | Bhh4d0        | basic helix-loop-helix family, repressive homeobox 3F        | NM_001040089 | 18.6          | 21.2    | 18.1    | 21.2    | 2.1     | 2.3     | 3.1     | 2.5     | 19.775   | 2.5        | -2.9952284 | -7.9758485 | 4.017E-05  |           |
| 621852 | A5_52_P0206254 | ST330419F03Rk | RIKEN cDNA 9330159F03 gene                                   | AI017575     | 160.8         | 26.2    | 108.4   | 195.1   | 19.7    | 14.4    | 26.9    | 28.9    | 181.725  | 22.475     | -2.9958713 | -7.9771383 | 0.00443398 |           |
| 14270  | A5_52_P428578  | Fam134b       | trans-3-enoyl-CoA reductase                                  | NM_025459    | 308.5         | 2991.3  | 4047.2  | 3108.5  | 406.3   | 540.1   | 371.9   | 344.1   | 3307.625 | 415.6      | -3.0013705 | -8.0176003 | 0.00022895 |           |
| 66928  | A5_52_P2094060 | Gzma          | granzyme A                                                   | NM_010370    | 24.2          | 19.5    | 22      | 14.4    | 2       | 2.4     | 3       | 2.5     | 20.025   | 2.475      | -3.0049602 | -8.0275526 | 0.00066609 |           |
| 20360  | A5_52_P851377  | Angpt2        | angiopoietin-like 2                                          | NM_011923    | 33.9          | 31.1    | 39.1    | 53.2    | 3.5     | 4.5     | 4.8     | 3.6     | 39.325   | 5.1        | -3.0146645 | -8.081732  | 0.0384288  |           |
| 12293  | A5_52_P169923  | Gzmb          | calcium channel, voltage-dependent gamma 2                   | NM_030612023 | 1238.6        | 1386.8  | 1338.1  | 195.4   | 155.1   | 174.6   | 156.2   | 1378.05 | 1704     | 157.1      | -3.0176811 | -8.0880951 | 1.43E-05   |           |
| 65255  | A5_52_P594756  | Adb1          | ankyrin repeat and SOCS box coagulation factor II (thrombin) | NM_009775    | 19.1          | 35.1    | 17      | 23.2    | 1.9     | 2.2     | 2.9     | 2.4     | 19.3     | 2.3        | -3.0255653 | -8.126337  | 0.00046644 |           |
| 14025  | A5_52_P380005  | Galm3         | UGT-N-acetyl-alpha-D-glucosyltransferase                     | NM_015736    | 16.2          | 16.2    | 16.2    | 16.8    | 1.9     | 3.6     | 3       | 2.4     | 2.9      | 2.75       | -3.036684  | -8.2006278 | 0.0277743  |           |
| 40863  | A5_52_P240101  | CCO26258      | cDNA sequence BC062258                                       | BC029791     | 612.65        | 600.7   | 661.2   | 614.4   | 73.7    | 73.7    | 74.7    | 664.675 | 809.275  | -3.0480832 | -8.2070185 | 0.000138   |            |           |
| 15277  | A5_52_P204800  | Rpl32         | ribosomal protein L32                                        | NM_018320    | 2158.2        | 2434    | 2452.3  | 2641.72 | 3194.3  | 3289.4  | 2577.5  | 2728.2  | 2424.675 | 2947.35    | -3.0496969 | -8.2571306 | 8.08E-06   |           |
| 66821  | A5_52_P243123  | Rpl31         | ribosomal protein L31                                        | NM_025425    | 23428         | 21218.7 | 18318.5 | 2418.6  | 3399.1  | 2518.8  | 3399.1  | 2019.3  | 21060.8  | 2588.2     | -3.0499372 | -8.2531063 | 0.000806   |           |
| 69498  | A5_52_P2288265 | CCO2706Rk     | RIKEN cDNA 231000706R gene                                   | AI009210     | 4169.2        | 4785.3  | 5387.9  | 4960.9  | 448.2   | 673.8   | 558.4   | 680.6   | 4825.825 | 590.25     | -3.045462  | -8.2561091 | 0.0011842  |           |
| 1821   | A5_52_P206580  | Rpl30         | ribosomal protein L30                                        | NM_009465    | 25.6          | 27.6    | 25.6    | 27.6    | 2.5     | 2.6     | 2.5     | 23.6    | 25.5     | 23.6       | -3.048302  | -8.2619422 | 0.0024942  |           |
| 24454  | A5_52_P0205629 | Mts1l         | metastasis suppressor 1-like                                 | NM_159825    | 2048          | 1743.1  | 2123.2  | 2001.1  | 259.4   | 205.7   | 23.2    | 236.2   | 1983.06  | 231.6      | -3.0843206 | -8.4815066 | 3.73E-06   |           |
| 106762 | A5_52_P2361731 | AW047481      | expressed sequence AW047481                                  | B0482422     | 20.2          | 18.5    | 21.9    | 19.7    | 1.9     | 2.4     | 2.9     | 2.3     | 20.075   | 2.375      | -3.0929997 | -8.532664  | 3.1801E-05 |           |
| 212448 | A5_52_P232485  | 9330159F19Rk  | RIKEN cDNA 9330159F19 gene                                   | AI016237     | 55.8          | 48.9    | 57.4    | 63.12   | 62.7    | 70.9    | 66.1    | 63.1    | 562.675  | 65.7       | -3.0941575 | -8.5393525 | 1.641E-05  |           |
| 664382 | A5_52_P1934438 | Gm7967        | predicted gene 7967                                          | AK140131     | 740.9         | 796.2   | 842.3   | 103.8   | 9.8     | 8.8     | 8.4     | 78.6    | 775.325  | 90.37      | -3.1069248 | -8.6154418 | 6.24E-06   |           |
| 50812  | A5_52_P294495  | Rarg2         | retinylate reductase 2                                       | NM_018870    | 105419.4      | 81741   | 87246   | 77466   | 10479.4 | 11140   | 14299.4 | 8766    | 90128.7  | 161.25     | -3.108353  | -8.6238718 | 0.0009784  |           |
| 162784 | A5_52_P2361731 | AW047481      | expressed sequence AW047481                                  | B0482422     | 20.2          | 18.5    | 21.9    | 19.7    | 1.9     | 2.4     | 2.9     | 2.3     | 20.075   | 2.375      | -3.0929997 | -8.532664  | 3.1801E-05 |           |
| 62485  | A5_52_P232485  | 9330159F19Rk  | RIKEN cDNA 9330159F19 gene                                   | AI016237     | 55.8          | 48.9    | 57.4    | 63.12   | 62.7    | 70.9    | 66.1    | 63.1    | 562.675  | 65.7       | -3.0941575 | -8.5393525 | 1.641E-05  |           |
| 664382 | A5_52_P1934438 | Gm7967        | predicted gene 7967                                          | AK140131     | 740.9         | 796.2   | 842.3   | 103.8   | 9.8     | 8.8     | 8.4     | 78.6    | 775.325  | 90.37      | -3.1069248 | -8.6154418 | 6.24E-06   |           |
| 162784 | A5_52_P2361731 | AW047481      | expressed sequence AW047481                                  | B0482422     | 20.2          | 18.5    | 21.9    | 19.7    | 1.9     | 2.4     | 2.9     | 2.3     | 20.075   | 2.375      | -3.0929997 | -8.532664  | 3.1801E-05 |           |
| 72485  | A5_52_P2342897 | Irc3          | liverish rich repeat containing 3                            | NM_028838    | 2463.9        | 1150.4  | 3402.5  | 2896.6  | 338.2   | 32.2    | 357.5   | 311.8   | 2916.925 | 332.375    | -3.1243363 | -8.6840029 | 9.67E-06   |           |
| 75341  | A5_52_P017195  | Rarg1         | retinylate reductase 1                                       | NM_029182    | 350.7         | 460     | 4235.4  | 4350.1  | 584.6   | 419.1   | 546.1   | 546.2   | 4568.75  | 546.1      | -3.124406  | -8.6204867 | 0.0009784  |           |
| 32873  | A5_52_P2312124 | AS3040831     | uncharacterized protein AS3040831                            | AK040831     | 42.4          | 26.5    | 22.1    | 22.9    | 5.5     | 2.5     | 2.9     | 2.4     | 28.475   | 3.325      | -3.134179  | -8.779447  | 0.0394688  |           |
| 68952  | A5_52_P179697  | Fam57b        | family with sequence similar to F57B                         | NM_026884    | 1364.7        | 912.8   | 1028    | 863.5   | 120.8   | 115     | 130.1   | 102     | 1042.25  | 116.975    | -3.1375827 | -8.800483  | 0.0010064  |           |
| 24275  | A5_52_P446106  | Irc3b         | liverish rich repeat containing 3b                           | NM_001162983 | 611.3         | 497.4   | 577.9   | 688.9   | 72.6    | 54.3    | 61.5    | 82.7    | 593.85   | 71.3       | -3.139571  | -8.814367  | 0.0014881  |           |
| 320775 | A5_52_P1902231 | CCO209Rk      | RIKEN cDNA 23100209R gene                                    | NM_029182    | 21.4          | 20.3    | 21.4    | 20.3    | 2.7     | 2.5     | 2.5     | 2.4     | 21.4     | 2.5        | -3.148     | -8.81729   | 0.0003966  |           |
| 31024  | A5_52_P238523  | Shia2         | shisa homolog 4 (Xenopus laevis)                             | NM_175259    | 6552.5        | 5820.6  | 7213.6  | 5931.8  | 764.3   | 714.7   | 743.3   | 630     | 6379.7   | 617.075    | -3.159584  | -8.9373929 | 2.38E-06   |           |
| 60733  | A5_52_P195881  | Kcgl1         | potassium voltage-gated channel accessory beta 1             | NM_025734    | 21.6          | 19.7    | 20.4    | 23.6    | 2       | 2.2     | 3       | 2.1     | 21.325   | 2.4        | -3.1646887 | -8.9674558 | 2.94E-07   |           |
| 14555  | A5_52_P16419   | Gndp          | glycerol-3-phosphate dehydrogenase                           | NM_010271    | 66716.5       | 57773.9 | 6137.9  | 55826.8 | 6810    | 6598    | 7030.1  | 6388.3  | 6004.725 | 6706.6     | -3.1685865 | -8.991654  | 6.67E-05   |           |
| 69810  | A5_52_P037520  | Gzma2         | granzyme A                                                   | NM_010370    | 1780.1        | 1656.6  | 1817.4  | 1760.7  | 19.8    | 25.7    | 23.7    | 17.4    | 167.95   | 19.8       | -3.1698454 | -8.9950212 | 1.33E-05   |           |
| 58201  | A5_52_P144818  | Ppp1r1a       | protein phosphatase 1, regulatory subunit 1A                 | NM_021391    | 302           | 264.6   | 269.9   | 317     | 35      | 38      | 26      | 295     | 288.375  | 32.125     | -3.1776002 | -9.0480801 | 2.98E-05   |           |
| 14064  | A5_52_P1960683 | F2            | coagulation factor II                                        | NM_010168    | 17.2          | 28      | 24.3    | 39.7    | 1.9     | 4.7     | 3.1     | 2.5     | 27.3     | 3.05       | -3.1781967 | -9.0517495 | 0.0418244  |           |
| 14431  | A5_52_P191905  | Gamt          | guanidinacetate methyltransferase                            | NM_010255    | 1556.6        | 1480.2  | 2347.1  | 1328.7  | 37.3    | 188.7   | 179.3   | 149.1   | 1655.65  | 178.6      | -3.1791169 | -9.0525254 | 0.0003679  |           |
| 221513 | A5_52_P193477  | Trmt1         | trimethyllysine methyltransferase                            | NM_010971    | 10927.7       | 7713.6  | 10116   | 9213    | 1016.6  | 1086.6  | 1086.6  | 1086.6  | 10134.25 | 1086.6     | -3.1802425 | -9.0537623 | 0.000138   |           |
| 74868  | A5_52_P197907  | Trmt5         | transmethylase protein 5                                     | NM_175212    | 3195.6        | 3788    | 4623.2  | 3787.4  | 354.3   | 425.3   | 345.2   | 345.2   | 364.275  | 345.275    | -3.185775  | -9.123475  | 4.53E-05   |           |
| 32941  | A5_52_P264695  | Cy3           | crystallin, mu                                               | NM_016669    | 921.5         | 740.4   | 861.1   | 608.4   | 80.6    | 89.4    | 94.8    | 74.2    | 782.85   | 84.75      | -3.1959604 | -9.1638914 | 5.067E-05  |           |
| 120795 | A5_52_P238158  | CCO39M14Rk    | RIKEN cDNA D8300M14 gene                                     | AI085995     | 293.1         | 291.1   | 285     | 299.8   | 37.5    | 24.6    | 33      | 33.8    | 292.25   | 32.225     | -3.1976361 | -9.1745416 | 2.06E-05   |           |
| 75000  | A5_52_P208106  | CCO3215Rk     | RIKEN cDNA D8300M3215 gene                                   | AI085995     | 1000000038032 | 198.1   | 188.7   | 181.9</ |         |         |         |         |          |            |            |            |            |           |

|          |             |              |                                |                    |          |          |          |         |        |         |         |          |           |            |            |            |            |
|----------|-------------|--------------|--------------------------------|--------------------|----------|----------|----------|---------|--------|---------|---------|----------|-----------|------------|------------|------------|------------|
| 50874    | 55_P1976574 | Tmod4        | tropomodulin 4                 | NM_016712          | 54438.9  | 51399.2  | 48534.2  | 4087.3  | 3860.4 | 3690.1  | 3848.3  | 5189.025 | 3871.525  | -3.7421599 | -33.44826  | 9.72E-08   |            |
| 11811    | 55_P197835  | Apob2e       | apolipoprotein B RNA edit      | NM_009694          | 20039.9  | 15263.7  | 25077.7  | 1909.4  | 156.1  | 132.5   | 155.7   | 145.2    | 1997.925  | 147.375    | -3.7442162 | -13.400511 | 1.32E-05   |
| 71008    | 55_P198155  | PO31001009Rk | RKEN CDNA 170341D09 g8         | NM_020599          | 81.6     | 79.9     | 49.8     | 6.6     | 7.6    | 3.1     | 6.6     | 30.5     | 83.85     | 6.525      | -3.747885  | -13.43483  | 0.0025123  |
| 242502   | 55_P198155  | Gm428        | predicted gene 428             | NM_001081644       | 43.6     | 61       | 40.7     | 63.8    | 4.7    | 6       | 3       | 2.5      | 52.275    | 4.05       | -3.7487303 | -13.442507 | 0.00095436 |
| 10041085 | 55_P215360  | G63000017Rk  | RKEN CDNA G63000017 g8         | NM_01173500        | 82.4     | 87.1     | 94.7     | 56      | 3.5    | 6.8     | 5.5     | 8.8      | 80.05     | 6.15       | -3.752999  | -13.48234  | 0.00245661 |
| 22417    | 55_P197973  | Wnt5r        | wntless-related MMTV inte      | ENSMUST0000097840  | 2415     | 3005.9   | 2481.7   | 2635.9  | 231.3  | 176.3   | 172.1   | 208.8    | 2650.525  | 197.125    | -3.7535493 | -13.487483 | 5.00E-06   |
| 401183   | 55_P107737  | 483242823Rk  | RKEN CDNA 483242823 g8         | NM_020599          | 40.4     | 40.4     | 38       | 24      | 1.1    | 1.5     | 2.5     | 3        | 33.25     | 3.5        | -3.760224  | -13.623396 | 0.001181   |
| 16497    | 55_P2130129 | Knob1        | potassium voltage-gated cha    | NM_010597          | 612.6    | 416.6    | 605.9    | 340.5   | 27.6   | 35.5    | 45.7    | 34.4     | 493.9     | 3.675      | -3.7703573 | -13.64557  | 0.00061812 |
| 39070    | 55_P2031781 | Col22a1      | collagen, type XXII, alpha 1   | NM_027174          | 1821.5   | 2300.4   | 2120.4   | 2870.7  | 119.6  | 126.2   | 218.7   | 153.8    | 2300.25   | 182.7      | -3.7830402 | -13.766026 | 0.0032957  |
| 69780    | 55_P2010191 | Serpin11     | serpin (or cysteine) peptida   | BC020847           | 491.3    | 236.1    | 584.5    | 850.6   | 74.6   | 39.6    | 53.4    | 31.1     | 663.125   | 49.675     | -3.7854346 | -13.788892 | 0.00359338 |
| 12830    | 55_P199593  | Col21a1      | collagen, type XXI, alpha 1    | NM_007740          | 48.6     | 48.6     | 48.6     | 48.6    | 6.7    | 7.6     | 3.1     | 6.6      | 30.5      | 3.5        | -3.7902092 | -13.82073  | 0.0013076  |
| 68330    | 55_P2051384 | Cdc8c        | colled-coil domain containi    | NM_026681          | 550.6    | 232.2    | 617.8    | 488.38  | 35.3   | 35.2    | 28.7    | 39.7     | 493.85    | 34.725     | -3.7993514 | -13.922201 | 0.000201   |
| 140703   | 55_P1954277 | Emid1        | EM domain containing 1         | NM_080595          | 2423.6   | 3081.3   | 2459.9   | 1680.2  | 147    | 181.5   | 160.5   | 125.1    | 2150.45   | 153.525    | -3.8044702 | -13.972034 | 2.9923E-05 |
| 16502    | 55_P200724  | Kcnc1        | potassium voltage-gated cha    | NM_008421          | 3443     | 2872.3   | 2935.5   | 3679.7  | 244.4  | 238.1   | 228.5   | 210.2    | 3322.625  | 230.3      | -3.805527  | -13.982073 | 1.14E-06   |
| 77028    | 55_P176583  | TR0010908Rk  | RKEN CDNA 17010908 g8          | NM_020643          | 113.3    | 110.8    | 123.8    | 159.8   | 10.4   | 11.1    | 3       | 2.8      | 13.25     | 9.975      | -3.8118002 | -14.042234 | 0.00237079 |
| 17906    | 55_P197544  | My2          | potassium, light polypeptide 2 | ENSMUST00000111750 | 42.5     | 49.6     | 43.9     | 46.9    | 3.1    | 4.2     | 3.2     | 2.6      | 45.725    | 2.03       | -3.8225208 | -14.147947 | 1.26E-05   |
| 12226    | 55_P1980379 | Ucp3         | uncoupling protein 3 (mitoc    | NM_009464          | 1208.9   | 902      | 1063.7   | 1008.5  | 77.9   | 70.1    | 92.4    | 56.9     | 1003.75   | 74.325     | -3.8285565 | -14.20735  | 2.77E-05   |
| 22551    | 55_P2150831 | Cd44         | cadherin 4                     | NM_009867          | 504.4    | 391.2    | 519.8    | 526     | 30.2   | 36.8    | 34.1    | 34.6     | 485.35    | 33.925     | -3.8321021 | -14.24222  | 2.63E-06   |
| 100702   | 55_P2037114 | Myo1D        | myosin light chain family, m   | NM_009678          | 113.3    | 110.8    | 123.8    | 159.8   | 10.4   | 11.1    | 3       | 2.8      | 13.25     | 9.975      | -3.8360222 | -14.26672  | 0.00237079 |
| 219651   | 55_P256577  | Rhbd1        | rhomoid, veinlet-like 1 (Dro   | NM_144816          | 785      | 669.8    | 675.5    | 451.6   | 44.4   | 39.8    | 55.5    | 30.5     | 615.95    | 42.55      | -3.859564  | -14.515959 | 0.00037126 |
| 69671    | 55_P2080815 | Tmem52       | transmembrane protein 52       | ENSMUST00000023920 | 2575.7   | 2564.4   | 2052.8   | 2270.2  | 178.7  | 143.4   | 144.2   | 191.9    | 2388.275  | 164.55     | -3.8638662 | -14.55971  | 6.24E-06   |
| 1004124  | 55_P131409  | Gm331        | predicted gene 331             | AI042795           | 33.2     | 32.3     | 39.3     | 32.1    | 1.8    | 2.3     | 2.9     | 2.4      | 34.225    | 2.35       | -3.8797036 | -14.719978 | 1.45E-05   |
| 12372    | 55_P191820  | Csq1         | calnexin 1                     | NM_009929          | 493.3    | 425.5    | 474.6    | 432.7   | 27.9   | 33.7    | 20.9    | 29.9     | 449.425   | 30.0       | -3.8844021 | -14.589732 | 7.56E-07   |
| 10011476 | 55_P2032079 | Gtp          | G protein subunit promoter b   | NM_016974          | 16418.6  | 1700.7   | 16957    | 8873.5  | 884.1  | 1304.1  | 785.5   | 978.4    | 14829.95  | 988.205    | -3.8846266 | -14.770294 | 0.00095056 |
| 311157   | 55_P2071354 | Fam1759      | family-with-sequence simil     | NM_177897          | 328.2    | 398.2    | 237.2    | 289.7   | 16.7   | 21.4    | 31.6    | 16.4     | 311.975   | 21.525     | -3.8935777 | -14.77778  | 0.000487   |
| 202089   | 55_P195423  | Utrn2        | lecithin-rich repeats and tr   | NM_172492          | 55.2     | 41.8     | 24.8     | 27.3    | 1.9    | 2.3     | 2.9     | 2.5      | 37.275    | 2.4        | -3.897377  | -14.901417 | 0.0009817  |
| 38666    | 55_P222725  | Hsp12        | ATPase, Hsp70 translocati      | NM_009526          | 705.7    | 767.7    | 694.9    | 839.8   | 52.3   | 52.3    | 40.5    | 6.6      | 749.925   | 494.425    | -3.915193  | -15.080574 | 1.42E-06   |
| 75581    | 55_P213102  | Hsp27        | Yfp2 domain family, memb       | NM_023784          | 3419.4   | 3437.5   | 3436.7   | 3573    | 197.9  | 281.8   | 267.7   | 180.8    | 3466.65   | 232.05     | -3.92663   | -15.206645 | 1.41E-05   |
| 59011    | 55_P379750  | Myo12        | myosin 12                      | NM_021508          | 91022.4  | 79990.2  | 77329.2  | 5297.8  | 596.1  | 529.7   | 464.2   | 7024.6   | 5465.125  | -3.9330002 | -15.273938 | 1.07E-05   |            |
| 30953    | 55_P161252  | Schp1        | schwannomin interacting pr     | NM_013928          | 779.4    | 703      | 864.4    | 527.9   | 42.6   | 52.7    | 42      | 46       | 718.675   | 45.825     | -3.9537121 | -15.494887 | 2.14E-05   |
| 662524   | 55_P171906  | Myo15        | myosin, light polypeptide 1    | NM_010477          | 425.7    | 466.2    | 412.4    | 45.4    | 4.6    | 5.2     | 4.6     | 5.7      | 57.15     | 4.6        | -3.957922  | -15.502728 | 0.00095056 |
| 21393    | 55_P242973  | Tcap         | int-actin cap                  | NM_0115240         | 163127.2 | 144781.4 | 160211.6 | 13979.8 | 957.8  | 11242.8 | 11242.8 | 5792.1   | 152024.55 | 10767.3    | -3.9704069 | -15.675141 | 0.00021275 |
| 16495    | 55_P141700  | Kcna7        | potassium voltage-gated cha    | NM_010596          | 9953.9   | 9707     | 9893.2   | 10124.5 | 660.8  | 576.4   | 584.1   | 645.3    | 9669.825  | 616.65     | -3.9710031 | -15.681925 | 2.03E-07   |
| 10040353 | 55_P2010048 | Z810416G20Rk | RKEN CDNA Z810416G20 g8        | BB067085           | 1673.7   | 2023.4   | 1908.6   | 1589.7  | 86.9   | 115.4   | 114.6   | 143.9    | 1798.85   | 115.2      | -3.9807648 | -15.78801  | 1.95E-05   |
| 66940    | 55_P205732  | Myh7b        | myosin, heavy chain 7b, car    | NM_010083738       | 191.6    | 348.4    | 137.2    | 300.1   | 19.1   | 12.5    | 9       | 19.4     | 244.325   | 15.075     | -3.9903546 | -15.893386 | 0.0127761  |
| 16013    | 55_P291702  | Myo13        | myosin light growth factor b   | NM_010518          | 6425.7   | 6425.7   | 6425.7   | 6425.7  | 317.8  | 452.3   | 412.3   | 317.8    | 999.75    | 372.5      | -3.9932922 | -15.940982 | 0.00095056 |
| 100702   | 55_P2052385 | Cd36         | glycosylated binding protein 6 | NM_194336          | 101.6    | 206      | 106.6    | 151.2   | 10.4   | 5.8     | 8.7     | 9.3      | 139.25    | 8.55       | -3.9993296 | -15.992566 | 0.00123275 |
| 19245    | 55_P132273  | Ptp4d3       | protein tyrosine phosphatase   | NM_008975          | 12257.8  | 11224.8  | 13070.9  | 11525.2 | 738.4  | 874.9   | 754.9   | 639.1    | 12026.5   | 761.825    | -4.0061326 | -16.068157 | 1.02E-06   |
| 83979    | 55_P2058127 | Myo14        | phosphodiesterase 4D inter     | NM_177145          | 2384.6   | 2323.1   | 2158.6   | 2386.1  | 138.1  | 180.2   | 160     | 120.2    | 2679.4    | 185.15     | -4.0139679 | -16.155662 | 7.93E-06   |
| 12723    | 55_P201920  | Chp1         | chaperone 1                    | NM_013499          | 531      | 588.5    | 468.6    | 612.4   | 51.8   | 29      | 26      | 53.1     | 517.1     | 45.8       | -4.0220926 | -16.245988 | 0.0019152  |
| 542798   | 55_P195328  | Tmem233      | transmembrane protein 233      | NM_01101546        | 1373.2   | 746.7    | 736.5    | 850.2   | 72.5   | 40.6    | 56.5    | 57.4     | 951.425   | 56.75      | -4.0548908 | -16.620488 | 0.00073883 |
| 12595    | 55_P2012563 | Canol1       | calcium channel, voltage-de    | NM_031173          | 2928.4   | 2543.1   | 2496.3   | 2612    | 163.1  | 171.3   | 162     | 139.1    | 2644.95   | 158.875    | -4.0587403 | -16.664895 | 3.22E-07   |
| 30052    | 55_P2496202 | Pcsk1n       | proprotein convertase subst    | NM_113892          | 1208.3   | 84.7     | 1268.8   | 819.8   | 48.5   | 53.2    | 85.1    | 61.3     | 1036.075  | 62.025     | -4.0679675 | -16.718211 | 0.0020222  |
| 7528     | 55_P121025  | Myo16        | DNA segment, human BAS1        | NM_010518          | 6425.7   | 6425.7   | 6425.7   | 6425.7  | 317.8  | 452.3   | 412.3   | 317.8    | 999.75    | 372.5      | -4.0722728 | -16.81242  | 0.00095056 |
| 77424    | 55_P1972710 | Spink1       | serpin protease inhibitor, sub | NM_183123          | 47.1     | 49.1     | 36       | 50.6    | 2.5    | 2.6     | 3.1     | 2.5      | 45.7      | 2.6        | -4.0879152 | -17.005331 | 3.61E-06   |
| 16484    | 55_P1954229 | Hrc          | histidine rich calcium-bi      | NM_010473          | 8704.2   | 74424.9  | 78179.3  | 72581.2 | 4979.1 | 4049.7  | 4718.1  | 4393.7   | 78075.9   | 4534       | -4.1064576 | -17.225305 | 3.60E-07   |
| 25855    | 55_P1994400 | Rfx1         | RNA binding protein, form I    | NM_011477          | 30462.2  | 31521.8  | 31887.6  | 28701.8 | 1972.8 | 1682    | 1818    | 1927.1   | 30763.35  | 1781.625   | -4.110863  | -17.27794  | 8.84E-08   |
| 117901   | 55_P177120  | Myo17        | myosin, light polypeptide 1    | NM_01113387        | 5793.0   | 4762.9   | 4921.6   | 4318.9  | 328.9  | 3176.1  | 483.2   | 284.8    | 5942.675  | 315.6      | -4.1203694 | -17.392111 | 1.79E-05   |
| 244071   | 55_P2099615 | Agd1l        | ATP/GTP binding protein-like   | NM_01199224        | 58.7     | 52.6     | 34.8     | 40.5    | 1.9    | 3.7     | 2.8     | 2.4      | 46.65     | 2.7        | -4.1278977 | -17.421413 | 0.0038517  |
| 67484    | 55_P1317191 | Efp1         | endonuclease/exonuclease       | NM_026189          | 1189.8   | 978      | 1129.5   | 1000.6  | 54.2   | 69.2    | 59.4    | 54       | 1074.475  | 59.2       | -4.1845287 | -18.183124 | 8.79E-07   |
| 24992    | 55_P212053  | Kcnc5        | potassium voltage-gated cha    | NM_01160139        | 140.4    | 160.1    | 140.8    | 155.3   | 9.8    | 10.4    | 6       | 7.3      | 149.15    | 8.375      | -4.1871235 | -18.21863  | 3.13E-05   |
| 791346   | 55_P201245  | Myo18B       | myosin, light polypeptide 1    | ENSMUST00000097929 | 140.4    | 160.1    | 140.8    | 155.3   | 9.8    | 10.4    | 6       | 7.3      | 149.15    | 8.375      | -4.1871235 | -18.21863  | 3.13E-05   |
| 100702   | 55_P2028184 | Flh3         | 4 and a half LIM domains       | NM_010213          | 120.5    | 91.8     | 104.2    | 61.5    | 4.3    | 3.5     | 9.9     | 4.1      | 94.5      | 4.45       | -4.2060734 | -18.266004 | 0.00749093 |
| 69671    | 55_P1993153 | Smtm1        | smoothenin-like 1              | NM_024230          | 4975.9   | 6152.9   | 4339.2   | 6136.2  | 360.9  | 309.8   | 274.8   | 264.9    | 5401.05   | 309.1      | -4.214438  | -18.25542  | 3.00E-06   |
| 10054121 | 55_P2127407 | Rfx2         | RNA-binding protein 2          | NM_104959          | 5121.2   | 5299.9   | 6127     | 6151    | 22.5   | 33.1    | 38.3    | 29.9     | 567.405   | 28.875     | -4.2215405 | -18.655647 | 1.61E-05   |
| 7708     | 55_P215103  | Myo19        | myosin, light polypeptide 1    | NM_010518          | 6425.7   | 6425.7   | 6425.7   | 6425.7  | 317.8  | 452.3   | 412.3   | 317.8    | 999.75    | 372.5      | -4.2215405 | -18.655647 | 1.61E-05   |
| 10054421 | 55_P227960  | Z900076A07Rk | RKEN CDNA Z900076A07 g8        | AA058873           | 1365.1   | 1258.5   | 1557.7   | 1479.1  | 73.6   | 74.4    | 74.3    | 73.3     | 1415.1    | 74.15      | -4.2497005 | -19.02365  | 1.16E-07   |
| 22004    | 55_P2121408 | Tpm2         | tropomyosin 2, beta            | NM_009416          | 36022.8  | 32200.9  | 35672.4  | 29016.6 | 1718.7 | 1718.7  | 2198.7  | 1690.2   | 44277     | 3227.175   | -4.2571004 | -19.089476 | 4.72E-06   |
| 71302    | 55_P2170881 | Ahrgh26      | RTPase activating protein      | NM_175164          | 192.8    | 190.9    | 265.9    | 107.3   | 15.7   | 8.8     | 5.3     | 10.6     | 189.225   | 10.1       | -4.261425  | -19.78593  | 0.0146615  |
| 25805    | 55_P218395  | Myo20        | myosin, light polypeptide 2    | NM_010518          | 768      | 759.9    | 768      | 768     | 37.8   | 45.1    | 28      | 45.1     | 89.675    | 28         | -4.261425  | -19.78593  | 0.0146615  |
| 100702   | 55_P205628  | Atg2a2       |                                |                    |          |          |          |         |        |         |         |          |           |            |            |            |            |
