# Supplementary material for: p300 and cAMP response element‐binding protein‐binding protein in skeletal muscle homeostasis, contractile function, and survival
Source: PubMed Central journal article supplement — J Cachexia Sarcopenia Muscle. 2020 Jan 3;11(2):464–77. doi: 10.1002/jcsm.12522 (PMC7113519; doi:10.1002/jcsm.12522), 2020-01-03
Supplement: JCSM-11-464-s004.pdf [file JCSM-11-464-s004.pdf]

**Table S2. Functional annotation of differentially expressed genes from microarray.**

List of significant (local false discovery rate [FDR]<0.1) gene ontology terms associated with genes differentially expressed in WT vs. PCKO mice.

| <b>Gene ontology: Biological Processes (GO:BP)</b> |                                                 |                            |                              |
|----------------------------------------------------|-------------------------------------------------|----------------------------|------------------------------|
| <b>GO term</b>                                     | <b>Description</b>                              | <b>conditional p-value</b> | <b>conditional local FDR</b> |
| GO:0003009                                         | skeletal muscle contraction                     | 2.69E-06                   | 0.002292486                  |
| GO:0055002                                         | striated muscle cell development                | 2.59E-05                   | 0.024674814                  |
| GO:0030239                                         | myofibril assembly                              | 4.61E-05                   | 0.073886325                  |
| GO:0043501                                         | skeletal muscle adaptation                      | 5.41771E-05                | 0.086232277                  |
| GO:0055001                                         | muscle cell development                         | 1.15E-04                   | 0.039372473                  |
| GO:0019318                                         | hexose metabolic process                        | 0.000138181                | 0.044788427                  |
| GO:0006096                                         | glycolytic process                              | 0.000170698                | 0.082184906                  |
| GO:0005996                                         | monosaccharide metabolic process                | 0.0002943                  | 0.031162582                  |
| GO:0006941                                         | striated muscle contraction                     | 0.000338281                | 0.033404457                  |
| GO:0044723                                         | single-organism carbohydrate metabolic process  | 0.000372411                | 0.029795978                  |
| GO:0044262                                         | cellular carbohydrate metabolic process         | 0.000599512                | 0.046469034                  |
| GO:0005975                                         | carbohydrate metabolic process                  | 0.000771294                | 0.078740185                  |
| GO:0090257                                         | regulation of muscle system process             | 0.000940396                | 0.062308227                  |
| GO:0046031                                         | ADP metabolic process                           | 0.00108688                 | 0.068654595                  |
| GO:0006936                                         | muscle contraction                              | 0.00136644                 | 0.048082629                  |
| GO:0060047                                         | heart contraction                               | 0.001790202                | 0.054319616                  |
| GO:0007517                                         | muscle organ development                        | 0.001922365                | 0.099960539                  |
| GO:0009179                                         | purine ribonucleoside diphos. metabolic process | 0.001938981                | 0.056356816                  |
| GO:0016052                                         | carbohydrate catabolic process                  | 0.002647306                | 0.065189033                  |
| GO:0061061                                         | muscle structure development                    | 0.004528557                | 0.083845881                  |
| GO:0060537                                         | muscle tissue development                       | 0.004693927                | 0.085248806                  |
| GO:0050879                                         | multicellular organismal movement               | 0.006570948                | 0.099361804                  |

| <b>Gene ontology: Cellular Components (GO:CC)</b> |                                   |                            |                              |
|---------------------------------------------------|-----------------------------------|----------------------------|------------------------------|
| <b>GO term</b>                                    | <b>Description</b>                | <b>conditional p-value</b> | <b>conditional local FDR</b> |
| GO:0030018                                        | Z disc                            | 2.84E-08                   | 6.94E-05                     |
| GO:0016529                                        | sarcoplasmic reticulum            | 1.27495E-05                | 0.004838942                  |
| GO:0030017                                        | sarcomere                         | 9.13256E-05                | 0.032803167                  |
| GO:0042383                                        | sarcolemma                        | 1.05E-04                   | 0.043717674                  |
| GO:0005865                                        | striated muscle thin filament     | 2.72E-04                   | 0.087621139                  |
| GO:0030016                                        | myofibril                         | 0.000930534                | 0.086682422                  |
| GO:1902495                                        | transmembrane transporter complex | 0.002049219                | 0.040147262                  |
| GO:0034702                                        | ion channel complex               | 0.002416511                | 0.068155696                  |
| GO:0042995                                        | cell projection                   | 0.016861336                | 0.099063716                  |
