# Supplementary material for: p300 and cAMP response element‐binding protein‐binding protein in skeletal muscle homeostasis, contractile function, and survival
Source: PubMed Central journal article supplement — J Cachexia Sarcopenia Muscle. 2020 Jan 3;11(2):464–77. doi: 10.1002/jcsm.12522 (PMC7113519; doi:10.1002/jcsm.12522), 2020-01-03
Supplement: JCSM-11-464-s005.pdf [file JCSM-11-464-s005.pdf]

**Table S3. TMT-MS data from WT, D3 PCKO and D5 PCKO mice.**

List of significantly (fold change [FC]>1.25, false discovery rate [FDR]<0.1) altered proteins in D5 PCKO vs. WT, or D3 PCKO vs. WT muscles.

| Accession              | Description                                                                                                    | WT-Avg      | D5-Avg      | logFC      | fold change | up in  | PValue   | FDR      |
|------------------------|----------------------------------------------------------------------------------------------------------------|-------------|-------------|------------|-------------|--------|----------|----------|
| sp Q8BWAS KLH31_MOUSE  | Kelch-like protein 31 OS=Mus musculus GN=Klh31 PE=1 SV=1                                                       | 147511.6667 | 54469.33333 | -1.451082  | 2.73        | WT-Avg | 6.21E-50 | 1.70E-46 |
| sp Q8BUZ1 ABRA_MOUSE   | Actin-binding Rho-activating protein OS=Mus musculus GN=Abra PE=1 SV=1                                         | 218693      | 589951      | 1.4210827  | 2.68        | D5-Avg | 1.11E-41 | 1.53E-38 |
| sp Q8KB83 YBOX3_MOUSE  | Y-box-binding protein 3 OS=Mus musculus GN=Ybx3 PE=1 SV=2                                                      | 298423.3333 | 142376.6667 | -1.080007  | 2.11        | WT-Avg | 4.28E-39 | 3.18E-36 |
| sp Q8C112 SMTL2_MOUSE  | Smoothelin-like protein 2 OS=Mus musculus GN=Smtl2 PE=1 SV=1                                                   | 563046.6667 | 241191      | -1.237611  | 2.36        | WT-Avg | 4.64E-39 | 3.18E-36 |
| sp Q60949 TBCD1_MOUSE  | TBC1 domain family member 1 OS=Mus musculus GN=Tbcd1 PE=1 SV=3                                                 | 343528      | 176383      | -0.975055  | 1.97        | WT-Avg | 2.11E-36 | 1.16E-33 |
| sp P15105 TXLNB_MOUSE  | Beta-taxilin OS=Mus musculus GN=Txlnb PE=1 SV=2                                                                | 142490      | 61181       | -1.23188   | 2.35        | WT-Avg | 2.09E-33 | 9.58E-31 |
| sp Q8C0L9 GPCP1_MOUSE  | Glycerophosphocholine phosphodiesterase GPCPD1 OS=Mus musculus GN=Gpcpd1 PE=1 SV=1                             | 167436      | 80403.66667 | -1.072572  | 2.10        | WT-Avg | 3.24E-32 | 1.27E-29 |
| sp Q6ZP99 KBP_MOUSE    | KIF1-binding protein OS=Mus musculus GN=Kif1bp PE=1 SV=2                                                       | 31380       | 66266.66667 | 1.066438   | 2.09        | D5-Avg | 4.19E-30 | 1.44E-27 |
| sp Q9CYG7 TOM34_MOUSE  | Mitochondrial import receptor subunit TOM34 OS=Mus musculus GN=Tomm34 PE=1 SV=1                                | 109162      | 192046.6667 | 0.8029507  | 1.74        | D5-Avg | 3.95E-29 | 1.20E-26 |
| sp Q17PW1 NEXN_MOUSE   | Nexilin OS=Mus musculus GN=Nexn PE=1 SV=3                                                                      | 205358.6667 | 83236.33333 | -1.316178  | 2.49        | WT-Avg | 1.09E-28 | 2.99E-26 |
| sp P14142 GTRA_MOUSE   | Solute carrier family 2, facilitated glucose transporter member 4 OS=Mus musculus GN=Slc2a4 PE=1 SV=1          | 176710      | 82299       | -1.12223   | 2.16        | WT-Avg | 2.05E-27 | 5.12E-25 |
| sp Q921U8 SMTN_MOUSE   | Smoothelin OS=Mus musculus GN=Smtn PE=1 SV=2                                                                   | 161383.6667 | 79332.66667 | -1.03699   | 2.05        | WT-Avg | 5.93E-26 | 1.36E-23 |
| sp Q9JMH9 MY18A_MOUSE  | Unconventional myosin-XVIIIA OS=Mus musculus GN=Myo18a PE=1 SV=2                                               | 254435.3333 | 141656.3333 | -0.856334  | 1.81        | WT-Avg | 5.24E-25 | 1.11E-22 |
| sp Q17M729 SCN4B_MOUSE | Sodium channel subunit beta-4 OS=Mus musculus GN=Scn4b PE=1 SV=1                                               | 372933.3333 | 144260      | -1.384724  | 2.61        | WT-Avg | 8.80E-23 | 1.73E-20 |
| sp Q9JG0 TACC2_MOUSE   | Transforming acidic coiled-coil-containing protein 2 OS=Mus musculus GN=Tacc2 PE=1 SV=2                        | 57067.33333 | 29182.66667 | -0.981361  | 1.97        | WT-Avg | 1.04E-22 | 1.90E-20 |
| sp O89114 DNJB5_MOUSE  | DnaJ homolog subfamily B member 5 OS=Mus musculus GN=Dnajb5 PE=2 SV=1                                          | 147678      | 82173       | -0.849682  | 1.80        | WT-Avg | 1.72E-22 | 2.94E-20 |
| sp P15105 GLNA_MOUSE   | Glutamine synthetase OS=Mus musculus GN=Glul PE=1 SV=6                                                         | 220566.3333 | 114845.6667 | -0.952015  | 1.93        | WT-Avg | 2.85E-19 | 4.60E-17 |
| sp P70699 LYAG_MOUSE   | Lysosomal alpha-glucosidase OS=Mus musculus GN=Gaa PE=1 SV=2                                                   | 148302      | 226301.3333 | 0.596955   | 1.51        | D5-Avg | 2.88E-18 | 4.39E-16 |
| sp Q9Z2P8 VAMP5_MOUSE  | Vesicle-associated membrane protein 5 OS=Mus musculus GN=Vamp5 PE=1 SV=1                                       | 91580       | 54513.33333 | -0.761609  | 1.70        | WT-Avg | 3.90E-18 | 5.63E-16 |
| sp P60824 CIRBP_MOUSE  | Cold-inducible RNA-binding protein OS=Mus musculus GN=Cirbp PE=1 SV=1                                          | 44570.66667 | 92143.33333 | 1.0372867  | 2.05        | D5-Avg | 5.17E-18 | 7.09E-16 |
| sp E9QA62 LMOD3_MOUSE  | Leiomodin-3 OS=Mus musculus GN=Lmod3 PE=1 SV=1                                                                 | 75453.33333 | 34812       | -1.126776  | 2.18        | WT-Avg | 1.20E-17 | 1.57E-15 |
| sp P47856 GPTT1_MOUSE  | Glutamine-fructose-6-phosphate aminotransferase [isomerizing] 1 OS=Mus musculus GN=Gptt1 PE=1 SV=1             | 6058.666667 | 15452.33333 | 1.3392667  | 2.53        | D5-Avg | 2.15E-17 | 2.68E-15 |
| sp Q61584 FXR1_MOUSE   | Fragile X mental retardation syndrome-related protein 1 OS=Mus musculus GN=Fxrl PE=1 SV=2                      | 569958.6667 | 375145.3333 | -0.616006  | 1.53        | WT-Avg | 1.30E-16 | 1.55E-14 |
| sp P51150 RAB7A_MOUSE  | Ras-related protein Rab-7a OS=Mus musculus GN=Rab7a PE=1 SV=2                                                  | 645346      | 430145      | -0.598384  | 1.51        | WT-Avg | 1.17E-15 | 1.33E-13 |
| sp Q64152 BTFF3_MOUSE  | Transcription factor BTFF3 OS=Mus musculus GN=BTff3 PE=1 SV=3                                                  | 77968       | 50199.66667 | -0.648149  | 1.57        | WT-Avg | 5.74E-15 | 5.91E-13 |
| sp Q8R5A0 SMYD2_MOUSE  | N-lysine methyltransferase SMYD2 OS=Mus musculus GN=Smyd2 PE=1 SV=1                                            | 337649.3333 | 218318      | -0.643358  | 1.56        | WT-Avg | 5.75E-15 | 5.91E-13 |
| sp Q99M57 EH111_MOUSE  | EH domain-binding protein l-like protein 1 OS=Mus musculus GN=Ehbp111 PE=1 SV=1                                | 314706.6667 | 208972.3333 | -0.603656  | 1.52        | WT-Avg | 5.82E-15 | 5.91E-13 |
| sp Q9D1K2 VATF_MOUSE   | V-type proton ATPase subunit F OS=Mus musculus GN=Atp6vf1 PE=1 SV=2                                            | 42824.66667 | 73546.66667 | 0.7687711  | 1.70        | D5-Avg | 6.90E-15 | 6.77E-13 |
| sp P6PEE3 RR2B_MOUSE   | Ribonucleoside-diphosphate reductase subunit M2 B OS=Mus musculus GN=Rrm2b PE=1 SV=1                           | 11960.33333 | 23344       | 0.9520701  | 1.93        | D5-Avg | 1.42E-14 | 1.35E-12 |
| sp Q97934 PHKG1_MOUSE  | Phosphorylase b kinase gamma catalytic chain, skeletal muscle/heart isoform OS=Mus musculus GN=Phkg1 PE=1 SV=1 | 3054298     | 1840874     | -0.744669  | 1.68        | WT-Avg | 2.04E-14 | 1.87E-12 |
| sp P62932 FBX40_MOUSE  | F-box only protein 40 OS=Mus musculus GN=Foxo40 PE=1 SV=1                                                      | 114422.6667 | 50830.33333 | -1.183749  | 2.27        | WT-Avg | 2.25E-14 | 2.00E-12 |
| sp O35127 C10_MOUSE    | Protein C10 OS=Mus musculus GN=Grc10 PE=1 SV=1                                                                 | 33423       | 57225.66667 | 0.7639526  | 1.70        | D5-Avg | 3.48E-14 | 2.99E-12 |
| sp Q5DTJ9 MYPN_MOUSE   | Myopalladin OS=Mus musculus GN=Mypn PE=1 SV=2                                                                  | 668699.6667 | 461513.6667 | -0.546937  | 1.46        | WT-Avg | 7.38E-14 | 6.14E-12 |
| sp P28558 ATX10_MOUSE  | Ataxin-10 OS=Mus musculus GN=Atxn10 PE=1 SV=2                                                                  | 52509       | 80502.33333 | 0.6044307  | 1.52        | D5-Avg | 8.99E-14 | 7.25E-12 |
| sp Q38HM4 TRIG6_MOUSE  | E3 ubiquitin-protein ligase TRIM63 OS=Mus musculus GN=Trim63 PE=1 SV=1                                         | 25554.33333 | 67795       | 1.3956871  | 2.63        | D5-Avg | 1.01E-13 | 7.88E-12 |
| sp P17047 LAMP2_MOUSE  | Lysosome-associated membrane glycoprotein 2 OS=Mus musculus GN=Lamp2 PE=1 SV=2                                 | 139975.3333 | 208600      | 0.5618903  | 1.48        | D5-Avg | 1.05E-13 | 7.99E-12 |
| sp Q8R010 AIMP2_MOUSE  | Aminoacyl tRNA synthase complex-interacting multifunctional protein 2 OS=Mus musculus GN=Aimp2                 | 133585      | 87423       | -0.624953  | 1.54        | WT-Avg | 5.23E-13 | 3.78E-11 |
| tr E9PWZ3 E9PWZ3_MOUSE | Ribosomal protein L3-like OS=Mus musculus GN=Rpl3l PE=1 SV=1                                                   | 437923.3333 | 313323.3333 | -0.496802  | 1.41        | WT-Avg | 7.60E-13 | 5.35E-11 |
| sp Q62213 CLIP1_MOUSE  | CAP-Gly domain-containing linker protein 1 OS=Mus musculus GN=Clip1 PE=1 SV=1                                  | 934660.6667 | 651001.3333 | -0.53522   | 1.45        | WT-Avg | 1.22E-12 | 8.38E-11 |
| sp Q9CR57 RL14_MOUSE   | 60S ribosomal protein L14 OS=Mus musculus GN=Rpl14 PE=1 SV=3                                                   | 252610      | 182847.3333 | -0.478667  | 1.39        | WT-Avg | 1.26E-12 | 8.46E-11 |
| sp A3FX0 SNT1A_MOUSE   | Cytosolic 5'-nucleotidase 1A OS=Mus musculus GN=Nt5c1a PE=1 SV=1                                               | 194399      | 131212      | -0.580745  | 1.50        | WT-Avg | 1.46E-12 | 9.56E-11 |
| sp O09012 PEXS_MOUSE   | Peroxisomal targeting signal 1 receptor OS=Mus musculus GN=Pex5 PE=1 SV=2                                      | 7827.66667  | 14445.66667 | 0.8707712  | 1.83        | D5-Avg | 1.54E-12 | 9.80E-11 |
| sp P60755 BSDC1_MOUSE  | BSD domain-containing protein 1 OS=Mus musculus GN=Bsdc1 PE=1 SV=1                                             | 8429.333333 | 15267.33333 | 0.8463134  | 1.80        | D5-Avg | 1.57E-12 | 9.80E-11 |
| sp Q91Y10 ARLG_MOUSE   | Argininosuccinate lyase OS=Mus musculus GN=Asl PE=1 SV=1                                                       | 81110.66667 | 123289.6667 | 0.5905612  | 1.51        | D5-Avg | 1.98E-12 | 1.20E-10 |
| sp Q9QYGO NDRG2_MOUSE  | Protein NDRG2 OS=Mus musculus GN=Ndrgr2 PE=1 SV=1                                                              | 193421.6667 | 1313727     | -0.570237  | 1.48        | WT-Avg | 2.74E-12 | 1.63E-10 |
| sp Q8B9F1 CHM2B_MOUSE  | Charged multivesicular body protein 2b OS=Mus musculus GN=Chmp2b PE=1 SV=1                                     | 56751.66667 | 84848.33333 | 0.5627829  | 1.48        | D5-Avg | 4.56E-12 | 2.66E-10 |
| sp Q8VE91 RETR1_MOUSE  | Reticulocyte regulator 1 OS=Mus musculus GN=Retrg1 PE=1 SV=2                                                   | 41030.66667 | 23524       | -0.813575  | 1.76        | WT-Avg | 5.10E-12 | 2.92E-10 |
| sp P53996 CNBP_MOUSE   | Cellular nucleic acid-binding protein OS=Mus musculus GN=Cnbp PE=1 SV=2                                        | 256807      | 176105      | -0.557223  | 1.47        | WT-Avg | 1.20E-11 | 6.73E-10 |
| sp Q7S742 KPBB_MOUSE   | Phosphorylase b kinase regulatory subunit beta OS=Mus musculus GN=Phkb PE=1 SV=1                               | 3091699.333 | 1957538.667 | -0.673803  | 1.60        | WT-Avg | 1.44E-11 | 7.89E-10 |
| sp P67984 RL22_MOUSE   | 60S ribosomal protein L22 OS=Mus musculus GN=Rpl22 PE=1 SV=2                                                   | 323440      | 222480      | -0.553246  | 1.47        | WT-Avg | 1.65E-11 | 8.88E-10 |
| sp Q8K268 ABC3F3_MOUSE | ATP-binding cassette sub-family F member 3 OS=Mus musculus GN=Abcf3 PE=1 SV=1                                  | 77729       | 112353.3333 | 0.5200669  | 1.43        | D5-Avg | 1.83E-11 | 9.63E-10 |
| sp Q9R095 UBE3C_MOUSE  | Ubiquitin-protein ligase E3C OS=Mus musculus GN=Ube3c PE=1 SV=2                                                | 25666       | 40755.66667 | 0.6562772  | 1.58        | D5-Avg | 2.14E-11 | 1.11E-09 |
| sp Q62418 DBNL_MOUSE   | Drebrin-like protein OS=Mus musculus GN=Dbnl PE=1 SV=2                                                         | 37574.33333 | 67801.66667 | 0.8415097  | 1.79        | D5-Avg | 2.32E-11 | 1.18E-09 |
| sp Q3U2A1 CP2P_MOUSE   | Cap2-interacting protein OS=Mus musculus GN=Rcsd1 PE=1 SV=1                                                    | 94126.66667 | 62297.33333 | -0.605539  | 1.52        | WT-Avg | 2.37E-11 | 1.18E-09 |
| sp Q8K0C4 CP5A_MOUSE   | Lanosterol 14-alpha demethylase OS=Mus musculus GN=Cyp51a1 PE=1 SV=1                                           | 9500.333333 | 18517.66667 | 0.9544283  | 1.94        | D5-Avg | 7.35E-11 | 3.54E-09 |
| sp P42323 LTP5_MOUSE   | Signal transducer and activator of transcription 5b OS=Mus musculus GN=Stat5b PE=1 SV=1                        | 134346.6667 | 93686.66667 | -0.533214  | 1.45        | WT-Avg | 9.70E-11 | 4.59E-09 |
| sp P84099 RL19_MOUSE   | 60S ribosomal protein L19 OS=Mus musculus GN=Rpl19 PE=1 SV=1                                                   | 181266.6667 | 126073.3333 | -0.535812  | 1.45        | WT-Avg | 1.07E-10 | 4.97E-09 |
| sp P62717 RL18A_MOUSE  | 60S ribosomal protein L18a OS=Mus musculus GN=Rpl18a PE=1 SV=1                                                 | 306896.6667 | 219530      | -0.496382  | 1.41        | WT-Avg | 1.25E-10 | 5.70E-09 |
| sp Q9DAR7 DCPS_MOUSE   | m7GpppX diphosphatase OS=Mus musculus GN=Dcps PE=1 SV=1                                                        | 25140.66667 | 39135.33333 | 0.6258072  | 1.54        | D5-Avg | 1.76E-10 | 7.93E-09 |
| sp P60843 IF4A1_MOUSE  | Eukaryotic initiation factor 4A-1 OS=Mus musculus GN=If4a1 PE=1 SV=1                                           | 451366.6667 | 640212      | 0.4934519  | 1.41        | D5-Avg | 2.00E-10 | 8.69E-09 |
| sp P62911 RL3_MOUSE    | 60S ribosomal protein L32 OS=Mus musculus GN=Rpl32 PE=1 SV=2                                                   | 106630.6667 | 73666.33333 | -0.545929  | 1.46        | WT-Avg | 2.98E-10 | 1.28E-08 |
| sp Q8BXT3 TMX3_MOUSE   | Protein disulfide-isomerase TMX3 OS=Mus musculus GN=Tmx3 PE=1 SV=2                                             | 181109.3333 | 243188.3333 | 0.4131016  | 1.33        | D5-Avg | 4.05E-10 | 1.71E-08 |
| sp Q9H05 LZTL1_MOUSE   | Leucine zipper transcription factor-like protein 1 OS=Mus musculus GN=Lztf1 PE=1 SV=1                          | 31699.66667 | 50065.33333 | 0.6486357  | 1.57        | D5-Avg | 5.30E-10 | 2.21E-08 |
| sp Q8B695 MYPT2_MOUSE  | Protein phosphatase 1 regulatory subunit 12B OS=Mus musculus GN=Ppp1r12b PE=1 SV=2                             | 474219.6667 | 279248.3333 | -0.77855   | 1.72        | WT-Avg | 6.77E-10 | 2.77E-08 |
| sp Q8N7N5 DCAF8_MOUSE  | DDB1- and CLU4-associated factor 8 OS=Mus musculus GN=Dcaf8 PE=1 SV=1                                          | 101561.3333 | 144311      | 0.4945309  | 1.41        | D5-Avg | 7.19E-10 | 2.90E-08 |
| sp O88569 ROA2_MOUSE   | Heterogeneous nuclear ribonucleoproteins A2/B1 OS=Mus musculus GN=Hnnp2a1 PE=1 SV=2                            | 757536      | 1036891.667 | 0.4413906  | 1.36        | D5-Avg | 1.45E-09 | 5.78E-08 |
| sp P61027 RAB10_MOUSE  | Ras-related protein Rab-10 OS=Mus musculus GN=Rab10 PE=1 SV=1                                                  | 864533.3333 | 634322.6667 | -0.460337  | 1.38        | WT-Avg | 1.73E-09 | 6.73E-08 |
| sp P47962 RL5_MOUSE    | 60S ribosomal protein L5 OS=Mus musculus GN=Rpl5 PE=1 SV=3                                                     | 748510      | 545846.3333 | -0.467292  | 1.38        | WT-Avg | 1.75E-09 | 6.73E-08 |
| sp Q62351 TFR1_MOUSE   | Transferrin receptor protein 1 OS=Mus musculus GN=Tfrc PE=1 SV=1                                               | 68507       | 49161.33333 | -0.490884  | 1.41        | WT-Avg | 1.76E-09 | 6.73E-08 |
| sp O88915 AIP_MOUSE    | AH receptor-interacting protein OS=Mus musculus GN=Aip PE=1 SV=1                                               | 87842.66667 | 127976.3333 | 0.5285332  | 1.44        | D5-Avg | 1.82E-09 | 6.83E-08 |
| sp P62918 RL8_MOUSE    | 60S ribosomal protein L8 OS=Mus musculus GN=Rpl8 PE=1 SV=2                                                     | 127491.6667 | 91424.33333 | -0.493093  | 1.41        | WT-Avg | 2.43E-09 | 8.90E-08 |
| sp P14115 RL27A_MOUSE  | 60S ribosomal protein L27a OS=Mus musculus GN=Rpl27a PE=1 SV=5                                                 | 760550      | 571680.3333 | -0.424293  | 1.34        | WT-Avg | 2.63E-09 | 9.51E-08 |
| sp P47740 AL3A2_MOUSE  | Fatty aldehyde dehydrogenase OS=Mus musculus GN=Alhd3a2 PE=1 SV=2                                              | 83646.66667 | 115060      | 0.4473672  | 1.36        | D5-Avg | 2.76E-09 | 9.84E-08 |
| sp Q9ER60 SCN4A_MOUSE  | Sodium channel protein type 4 subunit alpha OS=Mus musculus GN=Scn4a PE=2 SV=1                                 | 342527      | 236511      | -0.548964  | 1.46        | WT-Avg | 2.80E-09 | 8.85E-08 |
| sp P0C511 SBK2_MOUSE   | Serine/threonine-protein kinase SBK2 OS=Mus musculus GN=Skb2 PE=3 SV=2                                         | 378886.6667 | 263996.6667 | -0.5327211 | 1.45        | WT-Avg | 3.11E-09 | 1.08E-07 |
| sp O70493 SNX12_MOUSE  | Sorting nexin-12 OS=Mus musculus GN=Snx12 PE=1 SV=1                                                            | 71480.33333 | 105025      | 0.5447911  | 1.46        | D5-Avg | 3.46E-09 | 1.19E-07 |
| sp Q8VC15 PEX19_MOUSE  | Peroxisomal biogenesis factor 19 OS=Mus musculus GN=Pex19 PE=1 SV=1                                            | 43549.66667 | 69254.66667 | 0.6589424  | 1.58        | D5-Avg | 3.60E-09 | 1.22E-07 |
| sp P62242 RS8_MOUSE    | 40S ribosomal protein S8 OS=Mus musculus GN=Rps8 PE=1 SV=2                                                     | 514566.6667 | 383236.6667 | -0.437262  | 1.35        | WT-Avg | 4.10E-09 | 1.37E-07 |
| sp Q8C9C7 SEYP_MOUSE   | Bifunctional glutamate/proline-tRNA ligase OS=Mus musculus GN=Eprs PE=1 SV=4                                   | 2430532     | 1722597     | -0.510786  | 1.42        | WT-Avg | 4.41E-09 | 1.46E-07 |
| sp Q9D197 RL34_MOUSE   | 60S ribosomal protein L34 OS=Mus musculus GN=Rpl34 PE=1 SV=2                                                   | 766560      | 543103.3333 | -0.507589  | 1.42        | WT-Avg | 4.85E-09 | 1.59E-07 |
| sp P53026 RL10A_MOUSE  | 60S ribosomal protein L10a OS=Mus musculus GN=Rpl10a PE=1 SV=3                                                 | 910606.3333 | 669566.6667 | -0.456136  | 1.37        | WT-Avg | 5.18E-09 | 1.67E-07 |
| sp Q99MR9 PPR3A_MOUSE  | Protein phosphatase 1 regulatory subunit 3A OS=Mus musculus GN=Ppp1r3a PE=1 SV=2                               | 2918748     | 2087442.667 | -0.495763  | 1.          |        |          |          |

|                        |                                                                                                       |              |              |            |      |        |          |          |
|------------------------|-------------------------------------------------------------------------------------------------------|--------------|--------------|------------|------|--------|----------|----------|
| sp Q9D2N9 VP33A_MOUSE  | Vacuolar protein sorting-associated protein 33A OS=Mus musculus GN=Vps33a PE=1 SV=2                   | 24501.33333  | 35299        | 0.5141591  | 1.43 | D5-Avg | 9.06E-08 | 2.49E-06 |
| sp P14206 RSSA_MOUSE   | 40S ribosomal protein SA OS=Mus musculus GN=Rpsa PE=1 SV=4                                            | 616898.3333  | 480558.3333  | -0.372458  | 1.29 | WT-Avg | 1.05E-07 | 2.85E-06 |
| sp Q9E5L4 M3K20_MOUSE  | Mitogen-activated protein kinase kinase 2 OS=Mus musculus GN=Map3k20 PE=1 SV=1                        | 148126       | 107791       | -0.471595  | 1.39 | WT-Avg | 1.36E-07 | 3.66E-06 |
| sp Q9QY13 DNIC7_MOUSE  | Dnal homolog subfamily C member 7 OS=Mus musculus GN=Dnajc7 PE=1 SV=2                                 | 39518.33333  | 54959.66667  | 0.4624666  | 1.38 | D5-Avg | 1.39E-07 | 3.70E-06 |
| sp Q60598 SRC8_MOUSE   | Src substrate cortactin OS=Mus musculus GN=Cttn PE=1 SV=2                                             | 82687        | 113526.6667  | 0.443717   | 1.36 | D5-Avg | 1.45E-07 | 3.82E-06 |
| sp Q8BH97 RCN3_MOUSE   | Reticulocalbin 3 OS=Mus musculus GN=Rcn3 PE=1 SV=1                                                    | 28048        | 18796.66667  | -0.590546  | 1.51 | WT-Avg | 1.56E-07 | 4.08E-06 |
| sp Q8BLY2 SYTC2_MOUSE  | Probable threonine--tRNA ligase 2, cytoplasmic OS=Mus musculus GN=Tarsl2 PE=1 SV=1                    | 252348.3333  | 187553.3333  | -0.44221   | 1.36 | WT-Avg | 1.72E-07 | 4.46E-06 |
| sp Q9QZF2 GPC1_MOUSE   | Glypican-1 OS=Mus musculus GN=Gpc1 PE=1 SV=1                                                          | 100788.3333  | 76802.66667  | -0.404634  | 1.32 | WT-Avg | 2.18E-07 | 5.58E-06 |
| sp O09167 RL21_MOUSE   | 60S ribosomal protein L21 OS=Mus musculus GN=Rpl21 PE=1 SV=3                                          | 396600.6667  | 298079.3333  | -0.425068  | 1.34 | WT-Avg | 2.23E-07 | 5.66E-06 |
| sp Q8VCH8 UBXN4_MOUSE  | UBX domain-containing protein 4 OS=Mus musculus GN=Ubxn4 PE=1 SV=1                                    | 18622        | 26653.33333  | 0.5052118  | 1.42 | D5-Avg | 2.48E-07 | 6.25E-06 |
| sp P62281 RS11_MOUSE   | 40S ribosomal protein S11 OS=Mus musculus GN=Rps11 PE=1 SV=3                                          | 765940       | 557606.6667  | -0.469781  | 1.38 | WT-Avg | 2.58E-07 | 6.43E-06 |
| sp P60867 RS20_MOUSE   | 40S ribosomal protein S20 OS=Mus musculus GN=Rps20 PE=1 SV=1                                          | 723820       | 516216.6667  | -0.499276  | 1.41 | WT-Avg | 2.98E-07 | 7.36E-06 |
| sp Q921F2 TADBP_MOUSE  | TAR DNA-binding protein 43 OS=Mus musculus GN=Tardbp PE=1 SV=1                                        | 185617.3333  | 243312.6667  | 0.378007   | 1.30 | D5-Avg | 2.86E-07 | 7.98E-06 |
| sp P62900 RL31_MOUSE   | 60S ribosomal protein L31 OS=Mus musculus GN=Rpl31 PE=1 SV=1                                          | 307503.3333  | 222460       | -0.478414  | 1.39 | WT-Avg | 4.06E-07 | 9.87E-06 |
| sp P114148 RL7_MOUSE   | 60S ribosomal protein L7 OS=Mus musculus GN=Rpl7 PE=1 SV=2                                            | 129996.6667  | 1014780      | -0.36944   | 1.29 | WT-Avg | 4.17E-07 | 9.98E-06 |
| sp P55096 ABC03_MOUSE  | ATP-binding cassette sub-family D member 3 OS=Mus musculus GN=Abcd3 PE=1 SV=2                         | 121576.6667  | 167963.3333  | 0.4548058  | 1.37 | D5-Avg | 4.18E-07 | 9.98E-06 |
| sp Q99N88 UBQL4_MOUSE  | Ubiquilin-4 OS=Mus musculus GN=Ublq4 PE=1 SV=1                                                        | 73616.33333  | 99021        | 0.4158932  | 1.33 | D5-Avg | 4.36E-07 | 1.03E-05 |
| sp Q9C0Q2 COMD4_MOUSE  | COMM domain-containing protein 4 OS=Mus musculus GN=Commd4 PE=1 SV=1                                  | 11843.33333  | 17725.66667  | 0.5681587  | 1.48 | D5-Avg | 4.76E-07 | 1.11E-05 |
| sp Q61166 MARE1_MOUSE  | Microtubule-associated protein RP/EB family member 1 OS=Mus musculus GN=Mapre1 PE=1 SV=3              | 133693.3333  | 173626.6667  | 0.3642736  | 1.29 | D5-Avg | 4.79E-07 | 1.11E-05 |
| sp P51667 MLRV_MOUSE   | Myosin regulatory light chain 2, ventricular/cardiac muscle isoform OS=Mus musculus GN=Myl2 PE=1 SV=1 | 388054.6667  | 913547.3333  | 1.2273985  | 2.34 | D5-Avg | 4.92E-07 | 1.14E-05 |
| sp Q99P6L UBXN6_MOUSE  | UBX domain-containing protein 6 OS=Mus musculus GN=Ubxn6 PE=1 SV=1                                    | 48660.66667  | 66384        | 0.4357651  | 1.35 | D5-Avg | 5.05E-07 | 1.15E-05 |
| sp P14869 RLA0_MOUSE   | 60S acidic ribosomal protein PO OS=Mus musculus GN=Rplp0 PE=1 SV=3                                    | 1030782.3333 | 800067.3333  | -0.377454  | 1.30 | WT-Avg | 5.53E-07 | 1.26E-05 |
| sp Q80K84 NRAP_MOUSE   | Nebulin-related anchoring protein OS=Mus musculus GN=Nrap PE=1 SV=3                                   | 1569441.3333 | 910189.6667  | -0.796427  | 1.74 | WT-Avg | 5.68E-07 | 1.28E-05 |
| sp P62962 PROF1_MOUSE  | Profilin-1 OS=Mus musculus GN=Pfn1 PE=1 SV=2                                                          | 1216062      | 1649681.3333 | 0.4285924  | 1.35 | D5-Avg | 5.77E-07 | 1.29E-05 |
| sp P35279 RAB6A_MOUSE  | Ras-related protein Rab-6A OS=Mus musculus GN=Rab6a PE=1 SV=4                                         | 43351.33333  | 59380        | 0.4430825  | 1.36 | D5-Avg | 6.34E-07 | 1.40E-05 |
| sp P18826 KPBI_MOUSE   | Phosphorylase b kinase regulatory subunit alpha, skeletal muscle isoform OS=Mus musculus GN=Pphka     | 4753646.667  | 3183166.667  | -0.5903103 | 1.51 | WT-Avg | 6.60E-07 | 1.45E-05 |
| sp P63147 UBE2B_MOUSE  | Ubiquitin-conjugating enzyme E2 B OS=Mus musculus GN=Ube2b PE=1 SV=1                                  | 104563.3333  | 77473.33333  | -0.44585   | 1.36 | WT-Avg | 6.90E-07 | 1.50E-05 |
| sp Q77NG5 EMAL2_MOUSE  | Echinoderm microtubule-associated protein-like 2 OS=Mus musculus GN=Eml2 PE=1 SV=1                    | 247036       | 320420       | 0.3622614  | 1.29 | D5-Avg | 8.02E-07 | 1.73E-05 |
| sp P35980 RL18_MOUSE   | 60S ribosomal protein L18 OS=Mus musculus GN=Rpl18 PE=1 SV=3                                          | 647076.6667  | 460770       | -0.50189   | 1.42 | WT-Avg | 8.54E-07 | 1.83E-05 |
| sp A3K659 P20D2_MOUSE  | Peptidase M20 domain-containing protein 2 OS=Mus musculus GN=Pm20d2 PE=1 SV=1                         | 148293.3333  | 110853.3333  | -0.430312  | 1.35 | WT-Avg | 8.82E-07 | 1.88E-05 |
| sp Q9ER00 STX12_MOUSE  | Syntaxin-12 OS=Mus musculus GN=Stx12 PE=1 SV=1                                                        | 74083.33333  | 96716.66667  | 0.3723318  | 1.29 | D5-Avg | 9.06E-07 | 1.91E-05 |
| sp Q98B4 NDUAB_MOUSE   | NADH dehydrogenase [ubiquinone] 1 alpha subcomplex subunit 11 OS=Mus musculus GN=Ndufa11 P            | 325466.6667  | 258045.6667  | -0.345953  | 1.27 | WT-Avg | 9.75E-07 | 2.04E-05 |
| sp O75711 PKD4_MOUSE   | [Pyruvate dehydrogenase (acetyl-transferring)] kinase isozyme 4, mitochondrial OS=Mus musculus GN=    | 525719.3333  | 847484.3333  | 0.676758   | 1.60 | D5-Avg | 1.03E-06 | 2.14E-05 |
| sp P24549 AL1A1_MOUSE  | Retinal dehydrogenase 1 OS=Mus musculus GN=Aldh1a1 PE=1 SV=5                                          | 644996.6667  | 479322       | -0.440867  | 1.36 | WT-Avg | 1.20E-06 | 2.48E-05 |
| sp Q8BLU2 MT21C_MOUSE  | Protein-lysine methyltransferase METTL21C OS=Mus musculus GN=Mettl21c PE=2 SV=1                       | 50893.33333  | 25869        | -0.99572   | 1.09 | WT-Avg | 1.22E-06 | 2.49E-05 |
| sp Q6ZWN5 RS9_MOUSE    | 40S ribosomal protein S9 OS=Mus musculus GN=Rps9 PE=1 SV=3                                            | 892105.6667  | 699021.6667  | -0.363905  | 1.29 | WT-Avg | 1.39E-06 | 2.78E-05 |
| sp Q9R059 FHL3_MOUSE   | Four and a half LIM domains protein 3 OS=Mus musculus GN=Fhl3 PE=1 SV=2                               | 1272954.667  | 951960.3333  | -0.37995   | 1.30 | WT-Avg | 1.42E-06 | 2.82E-05 |
| sp Q8BU0 SGTA_MOUSE    | Small glutamine-rich tetratricopeptide repeat-containing protein alpha OS=Mus musculus GN=5gta PE     | 400313.3333  | 504536.6667  | 0.3216103  | 1.25 | D5-Avg | 1.43E-06 | 2.82E-05 |
| sp Q9JK92 HSPB8_MOUSE  | Heat shock protein beta-8 OS=Mus musculus GN=Hspb8 PE=1 SV=1                                          | 268893.3333  | 198516.6667  | -0.45057   | 1.37 | WT-Avg | 1.44E-06 | 2.82E-05 |
| sp Q9BI83 SIA10_MOUSE  | Type 2 lactosaminase alpha-2,3-sialyltransferase OS=Mus musculus GN=Sl3gal6 PE=2 SV=3                 | 17507.33333  | 11536.66667  | -0.615459  | 1.53 | WT-Avg | 1.46E-06 | 2.84E-05 |
| sp Q9R0H0 ACOX1_MOUSE  | Peroxisomal acyl-coenzyme A oxidase 1 OS=Mus musculus GN=Acox1 PE=1 SV=5                              | 154282.3333  | 221620.6667  | 0.5124935  | 1.43 | D5-Avg | 1.48E-06 | 2.87E-05 |
| sp Q9T966 UAP1_MOUSE   | UDP-N-acetylhexosamine pyrophosphorylase-like protein 1 OS=Mus musculus GN=Uap11 PE=1 SV=1            | 11262.66667  | 16567.33333  | 0.5453614  | 1.46 | D5-Avg | 1.54E-06 | 2.95E-05 |
| sp P47941 CRKL_MOUSE   | Crk-like protein OS=Mus musculus GN=Crkl PE=1 SV=2                                                    | 202436.6667  | 257210       | 0.3339335  | 1.26 | D5-Avg | 1.71E-06 | 3.24E-05 |
| sp P48722 HS74L_MOUSE  | Heat shock 70 kDa protein 4L OS=Mus musculus GN=Hspa4l PE=1 SV=2                                      | 73579        | 102616       | 0.4680213  | 1.38 | D5-Avg | 1.73E-06 | 3.26E-05 |
| sp P12970 RL7A_MOUSE   | 60S ribosomal protein L7a OS=Mus musculus GN=Rpl7a PE=1 SV=2                                          | 178246.6667  | 133926.6667  | -0.425293  | 1.34 | WT-Avg | 1.79E-06 | 3.35E-05 |
| sp P62702 RS4X_MOUSE   | 40S ribosomal protein 4X, X isoform OS=Mus musculus GN=Rps4x PE=1 SV=2                                | 203643.3333  | 159376.6667  | -0.365432  | 1.29 | WT-Avg | 1.92E-06 | 3.55E-05 |
| sp Q9CY58 PAIRB_MOUSE  | Plasminogen activator inhibitor 1 RNA-binding protein OS=Mus musculus GN=Serpb1 PE=1 SV=2             | 712841       | 559524       | -0.362552  | 1.29 | WT-Avg | 1.96E-06 | 3.61E-05 |
| sp IA2AW9 RBGP1_MOUSE  | Rab GTPase-activating protein 1 OS=Mus musculus GN=Rabgap1 PE=1 SV=1                                  | 8179         | 14596.33333  | 0.3829852  | 1.77 | D5-Avg | 1.98E-06 | 3.61E-05 |
| sp Q5SW19 CLU_MOUSE    | Clustered mitochondria protein homolog OS=Mus musculus GN=Cluh PE=1 SV=2                              | 125805.6667  | 95757        | -0.406886  | 1.33 | WT-Avg | 2.09E-06 | 3.81E-05 |
| sp P62889 RL30_MOUSE   | 60S ribosomal protein L30 OS=Mus musculus GN=Rpl30 PE=1 SV=2                                          | 195570       | 146800       | -0.42855   | 1.35 | WT-Avg | 2.21E-06 | 3.96E-05 |
| sp Q9Z2Y3 HOME1_MOUSE  | Homer protein homolog 1 OS=Mus musculus GN=Homer1 PE=1 SV=2                                           | 112615.3333  | 87243.66667  | -0.381756  | 1.30 | WT-Avg | 2.23E-06 | 3.97E-05 |
| sp P47951 RL1_MOUSE    | 60S acidic ribosomal protein P1 OS=Mus musculus GN=Rplp1 PE=1 SV=1                                    | 305317.6667  | 239058.3333  | -0.365689  | 1.29 | WT-Avg | 2.35E-06 | 4.13E-05 |
| sp Q8R0N6 HOT_MOUSE    | Hydroxyacid-oxoacid transhydrogenase, mitochondrial OS=Mus musculus GN=Adhfe1 PE=1 SV=2               | 33650.33333  | 23353.66667  | -0.537046  | 1.45 | WT-Avg | 2.41E-06 | 4.22E-05 |
| sp Q9Z0P5 TWF2_MOUSE   | Twinfilin-2 OS=Mus musculus GN=Twf2 PE=1 SV=1                                                         | 231577       | 178872.6667  | -0.384919  | 1.31 | WT-Avg | 2.63E-06 | 4.56E-05 |
| sp P97461 RS5_MOUSE    | 40S ribosomal protein S5 OS=Mus musculus GN=Rps5 PE=1 SV=3                                            | 393265.3333  | 305299.6667  | -0.377479  | 1.30 | WT-Avg | 2.71E-06 | 4.67E-05 |
| sp P63276 RS17_MOUSE   | 40S ribosomal protein S17 OS=Mus musculus GN=Rps17 PE=1 SV=2                                          | 1090452      | 837129       | -0.392283  | 1.31 | WT-Avg | 2.78E-06 | 4.77E-05 |
| sp P61431 CLCN1_MOUSE  | Chloride channel protein 1 OS=Mus musculus GN=Clcn1 PE=1 SV=3                                         | 21754        | 14907        | -0.558139  | 1.47 | WT-Avg | 2.84E-06 | 4.84E-05 |
| sp P70280 VAMP7_MOUSE  | Vesicle-associated membrane protein 7 OS=Mus musculus GN=Vamp7 PE=1 SV=1                              | 31710.33333  | 44553.66667  | 0.4771959  | 1.39 | D5-Avg | 3.01E-06 | 5.08E-05 |
| sp Q9RPP3 TRIS4_MOUSE  | Tripartite motif-containing protein 54 OS=Mus musculus GN=Trim54 PE=1 SV=1                            | 65903        | 48811        | -0.445228  | 1.36 | WT-Avg | 3.09E-06 | 5.17E-05 |
| sp P62754 RS6_MOUSE    | 40S ribosomal protein S6 OS=Mus musculus GN=Rps6 PE=1 SV=1                                            | 395981       | 304205       | -0.391758  | 1.31 | WT-Avg | 3.15E-06 | 5.24E-05 |
| sp Q60575 KIF1B_MOUSE  | Kinesin-like protein KIF1B OS=Mus musculus GN=Kif1b PE=1 SV=2                                         | 38748.66667  | 27869        | -0.486701  | 1.40 | WT-Avg | 3.21E-06 | 5.31E-05 |
| sp Q8BGM7 AAKG3_MOUSE  | 5'-AMP-activated protein kinase subunit gamma-3 OS=Mus musculus GN=Prkg3 PE=1 SV=1                    | 26417        | 17578        | -0.602749  | 1.52 | WT-Avg | 3.26E-06 | 5.36E-05 |
| sp Q9R062 GLYG_MOUSE   | Glycogenin-1 OS=Mus musculus GN=Gyg1 PE=1 SV=3                                                        | 1500601.667  | 1193770.333  | -0.342707  | 1.27 | WT-Avg | 3.28E-06 | 5.36E-05 |
| sp P61211 ARL1_MOUSE   | ADP-ribosylation factor-like protein 1 OS=Mus musculus GN=Arf1 PE=1 SV=1                              | 88612        | 118948.3333  | 0.4141888  | 1.33 | D5-Avg | 3.45E-06 | 5.56E-05 |
| sp Q9D783 KLH40_MOUSE  | Kelch-like protein 40 OS=Mus musculus GN=Klhl40 PE=1 SV=1                                             | 1092173.333  | 743752.6667  | -0.564491  | 1.48 | WT-Avg | 3.68E-06 | 5.88E-05 |
| sp Q8K3R3 PLCD4_MOUSE  | 1-phosphatidylinositol 4,5-bisphosphate phosphodiesterase delta-4 OS=Mus musculus GN=Plcd4 PE=1       | 36546.66667  | 26748        | -0.464424  | 1.38 | WT-Avg | 3.90E-06 | 6.18E-05 |
| sp Q62348 TSN_MOUSE    | Translin OS=Mus musculus GN=Tsn PE=1 SV=1                                                             | 261260       | 333030       | 0.3391564  | 1.27 | D5-Avg | 4.05E-06 | 6.39E-05 |
| tr JQ3N89 JQ3N89_MOUSE | Angio-associated migratory protein OS=Mus musculus GN=Aamp PE=1 SV=1                                  | 14449        | 20474.33333  | 0.4919298  | 1.41 | D5-Avg | 4.37E-06 | 6.66E-05 |
| sp P61759 PFD3_MOUSE   | Prefoldin subunit 3 OS=Mus musculus GN=Vbp1 PE=1 SV=2                                                 | 191834.6667  | 245656       | 0.3439233  | 1.27 | D5-Avg | 4.51E-06 | 7.00E-05 |
| sp Q8CYG6 UN45B_MOUSE  | Protein unc-45 homolog B OS=Mus musculus GN=Unc45b PE=1 SV=1                                          | 1434853      | 1089232.667  | -0.411334  | 1.33 | WT-Avg | 4.85E-06 | 7.47E-05 |
| sp Q9EPL9 ACOX3_MOUSE  | Peroxisomal acyl-coenzyme A oxidase 3 OS=Mus musculus GN=Acox3 PE=1 SV=2                              | 26979        | 37189        | 0.4519218  | 1.37 | D5-Avg | 5.16E-06 | 7.89E-05 |
| sp P61924 COPZ1_MOUSE  | Coatamer subunit zeta-1 OS=Mus musculus GN=Copz1 PE=1 SV=1                                            | 29857        | 41395.33333  | 0.4601467  | 1.38 | D5-Avg | 5.18E-06 | 7.89E-05 |
| sp O70209 PDLI3_MOUSE  | PDZ and LIM domain protein 3 OS=Mus musculus GN=Pdlm3 PE=1 SV=1                                       | 2427618      | 1718913.667  | -0.508374  | 1.42 | WT-Avg | 5.96E-06 | 8.99E-05 |
| sp Q99L04 DHR51_MOUSE  | Dehydrogenase/reductase SDR family member 1 OS=Mus musculus GN=Dhrs1 PE=1 SV=1                        | 29263.33333  | 41180        | 0.4816864  | 1.40 | D5-Avg | 6.18E-06 | 9.21E-05 |
| sp P62320 SMD3_MOUSE   | Small nuclear ribonucleoprotein Sm D3 OS=Mus musculus GN=Snrpd3 PE=1 SV=1                             | 171583.3333  | 223290       | 0.3687882  | 1.29 | D5-Avg | 6.35E-06 | 9.42E-05 |
| sp Q7TQI3 OTUB1_MOUSE  | Ubiquitin thioesterase OTUB1 OS=Mus musculus GN=Otub1 PE=1 SV=2                                       | 355744       | 453976       | 0.3404683  | 1.27 | D5-Avg | 6.52E-06 | 9.62E-05 |
| sp Q9WV85 NDK3_MOUSE   | Nucleoside diphosphate kinase 3 OS=Mus musculus GN=Nme3 PE=1 SV=3                                     | 19515        | 27730        | 0.4951177  | 1.41 | D5-Avg | 6.57E-06 | 9.64E-05 |
| sp P02798 MT2_MOUSE    | Metallothionein-2 OS=Mus musculus GN=MT2 PE=1 SV=2                                                    | 5170.666667  | 15098.66667  | 1.5435967  | 2.92 | D5-Avg | 6.84E-06 | 9.98E-05 |
| sp Q9EQU5 SET_MOUSE    | Protein SET OS=Mus musculus GN=Set PE=1 SV=1                                                          | 72790        | 95063.33333  | 0.3733671  | 1.30 | D5-Avg | 6.92E-06 | 1.00E-04 |
| sp P62908 RS3_MOUSE    | 40S ribosomal protein S3 OS=Mus musculus GN=Rps3 PE=1 SV=1                                            | 1296033.333  | 1029876.667  | -0.343747  | 1.27 | WT-Avg | 6.99E-06 | 1.01E-04 |
| sp Q9CQR2 RS21_MOUSE   | 40S ribosomal protein S21 OS=Mus musculus GN=Rps21 PE=1 SV=1                                          | 242833.3333  | 184216.6667  | -0.411991  | 1.33 | WT-Avg | 8.11E-06 | 1.17E-04 |
| sp P62301 RS13_MOUSE   | 40S ribosomal protein S13 OS=Mus musculus GN=Rps13 PE=1 SV=2                                          | 600390       | 467163.3333  | -0.374983  | 1.30 | WT-Avg | 9.00E-06 | 1.29E-04 |
| sp Q61586 GPAT1_MOUSE  | Glycerol-3-phosphate acyltransferase 1, mitochondrial OS=Mus musculus GN=Gpm1 PE=1 SV=2               | 19696.33333  | 13398.33333  | -0.568438  | 1.48 | WT-Avg | 9.43E-06 | 1.34E-04 |
| sp P63325 RS10_MOUSE   | 40S ribosomal protein S10 OS=Mus musculus GN=Rps10 PE=1                                               |              |              |            |      |        |          |          |

|                        |                                                                                                        |             |             |           |      |        |          |          |
|------------------------|--------------------------------------------------------------------------------------------------------|-------------|-------------|-----------|------|--------|----------|----------|
| sp P31230 AIMP1_MOUSE  | Aminoacyl tRNA synthase complex-interacting multifunctional protein 1 OS=Mus musculus GN=Aimp1         | 438273.3333 | 331633.6667 | -0.417333 | 1.34 | WT-Avg | 1.90E-05 | 2.48E-04 |
| sp Q99K22 NEUA_MOUSE   | N-acetylneuraminase cytidylyltransferase OS=Mus musculus GN=Cmas PE=1 SV=2                             | 29968       | 40875.66667 | 0.4359236 | 1.35 | D5-Avg | 2.02E-05 | 2.63E-04 |
| sp P00493 HPRT_MOUSE   | Hypoxanthine-guanine phosphoribosyltransferase OS=Mus musculus GN=Hprt1 PE=1 SV=3                      | 36813.33333 | 48780       | 0.3936997 | 1.31 | D5-Avg | 2.17E-05 | 2.82E-04 |
| sp P17070 ABCC9_MOUSE  | ATP-binding cassette sub-family C member 9 OS=Mus musculus GN=Abcc9 PE=1 SV=2                          | 356530      | 272900.3333 | -0.399913 | 1.32 | WT-Avg | 2.30E-05 | 2.97E-04 |
| sp Q9CQC9 SAR1B_MOUSE  | GTP-binding protein SAR1B OS=Mus musculus GN=Sar1b PE=1 SV=1                                           | 903230      | 718123.3333 | -0.344005 | 1.27 | WT-Avg | 2.59E-05 | 3.31E-04 |
| sp P63168 DYL1_MOUSE   | Dynein light chain 1, cytoplasmic OS=Mus musculus GN=Dynll1 PE=1 SV=1                                  | 270113.3333 | 341280      | 0.3261092 | 1.25 | D5-Avg | 2.81E-05 | 3.58E-04 |
| sp Q60936 COQ8A_MOUSE  | Atypical kinase COQ8A, mitochondrial OS=Mus musculus GN=Coq8a PE=1 SV=2                                | 2303829.333 | 1627979.333 | -0.509243 | 1.42 | WT-Avg | 2.86E-05 | 3.61E-04 |
| sp Q9CWX3 CYBP_MOUSE   | Calcylin-binding protein OS=Mus musculus GN=Cycbp PE=1 SV=1                                            | 131456.6667 | 168296.6667 | 0.3425641 | 1.27 | D5-Avg | 2.87E-05 | 3.61E-04 |
| sp P60605 UB2G2_MOUSE  | Ubiquitin-conjugating enzyme E2 G2 OS=Mus musculus GN=Ube2g2 PE=1 SV=1                                 | 19032.66667 | 26194       | 0.4466229 | 1.36 | D5-Avg | 3.18E-05 | 3.99E-04 |
| sp P62267 RS23_MOUSE   | 40S ribosomal protein S23 OS=Mus musculus GN=Rps23 PE=1 SV=3                                           | 463060.6667 | 367465.6667 | -0.346184 | 1.27 | WT-Avg | 3.22E-05 | 4.02E-04 |
| sp P10126 EF1A1_MOUSE  | Elongation factor 1-alpha OS=Mus musculus GN=Eef1a1 PE=1 SV=3                                          | 1820329     | 1455194.667 | -0.33432  | 1.26 | WT-Avg | 3.30E-05 | 4.10E-04 |
| sp P55302 AMRP_MOUSE   | Alpha-2-macroglobulin receptor-associated protein OS=Mus musculus GN=Lrpa1 PE=1 SV=1                   | 210741.6667 | 266634.3333 | 0.3254091 | 1.25 | D5-Avg | 3.31E-05 | 4.10E-04 |
| sp Q555W2 PSME4_MOUSE  | Proteasome activator complex subunit 4 OS=Mus musculus GN=Psme4 PE=1 SV=1                              | 81999.66667 | 65724.66667 | -0.332003 | 1.26 | WT-Avg | 3.35E-05 | 4.13E-04 |
| sp Q8K4L3 SVIL_MOUSE   | Supervillin OS=Mus musculus GN=SVil PE=1 SV=1                                                          | 153879.3333 | 122458.3333 | -0.342002 | 1.27 | WT-Avg | 3.36E-05 | 4.44E-04 |
| sp Q54988 SLK_MOUSE    | STE20-like serine/threonine-protein kinase OS=Mus musculus GN=Slk PE=1 SV=2                            | 73085.66667 | 97840       | 0.4089408 | 1.33 | D5-Avg | 3.66E-05 | 4.45E-04 |
| sp Q9CPR4 RL17_MOUSE   | 60S ribosomal protein L17 OS=Mus musculus GN=Rpl17 PE=1 SV=3                                           | 825840      | 655471.6667 | -0.346092 | 1.27 | WT-Avg | 3.83E-05 | 4.62E-04 |
| sp Q9QZM0 UBQL2_MOUSE  | Ubiquilin-2 OS=Mus musculus GN=Ubqln2 PE=1 SV=2                                                        | 34090.66667 | 47524       | 0.4695958 | 1.38 | D5-Avg | 4.00E-05 | 4.79E-04 |
| sp P70670 NACAM_MOUSE  | Nascent polypeptide-associated complex subunit alpha, muscle-specific form OS=Mus musculus GN=N-       | 4716680.667 | 3435555     | -0.46923  | 1.38 | WT-Avg | 4.35E-05 | 5.20E-04 |
| sp Q91WK2 EIF3H_MOUSE  | Eukaryotic translation initiation factor 3 subunit H OS=Mus musculus GN=EIF3h PE=1 SV=1                | 137240      | 110989      | -0.318056 | 1.25 | WT-Avg | 4.53E-05 | 5.36E-04 |
| sp P90607 DPPP3_MOUSE  | Dipeptidyl peptidase 3 OS=Mus musculus GN=Dpp3 PE=1 SV=2                                               | 577105.3333 | 726143.6667 | 0.3179058 | 1.25 | WT-Avg | 4.66E-05 | 5.49E-04 |
| tr G32972 G3X972_MOUSE | SEC24 related gene family, member C (S. cerevisiae), isoform CRA_a OS=Mus musculus GN=Sec24c PE=1 SV=1 | 91548.33333 | 115345.6667 | 0.3208734 | 1.25 | D5-Avg | 4.68E-05 | 5.49E-04 |
| sp Q9DBE8 ALG2_MOUSE   | Alpha-1,3/1,6-mannosyltransferase ALG2 OS=Mus musculus GN=Alg2 PE=1 SV=2                               | 39014.66667 | 49983       | 0.3405098 | 1.27 | D5-Avg | 5.19E-05 | 6.04E-04 |
| sp Q80K20 RT10_MOUSE   | 28S ribosomal protein S10, mitochondrial OS=Mus musculus GN=Mrs10 PE=1 SV=1                            | 39506.66667 | 52751.66667 | 0.4027408 | 1.32 | D5-Avg | 5.41E-05 | 6.26E-04 |
| sp Q555W2 PSME4_MOUSE  | Proteasome activator complex subunit 4 OS=Mus musculus GN=Psme4 PE=1 SV=1                              | 81999.66667 | 65724.66667 | -0.332003 | 1.26 | WT-Avg | 3.35E-05 | 4.13E-04 |
| sp P97822 AN32E_MOUSE  | Acidic leucine-rich nuclear phosphoprotein 32 family member E OS=Mus musculus GN=Anp32e PE=1 SV=1      | 52703.33333 | 70174.33333 | 0.4031747 | 1.32 | D5-Avg | 5.94E-05 | 6.83E-04 |
| sp Q54988 SLK_MOUSE    | STE20-like serine/threonine-protein kinase OS=Mus musculus GN=Slk PE=1 SV=2                            | 73085.66667 | 97840       | 0.4089408 | 1.33 | D5-Avg | 3.66E-05 | 4.45E-04 |
| sp Q9CPR4 RL17_MOUSE   | 60S ribosomal protein L17 OS=Mus musculus GN=Rpl17 PE=1 SV=3                                           | 825840      | 655471.6667 | -0.346092 | 1.27 | WT-Avg | 3.83E-05 | 4.62E-04 |
| sp P62267 RS23_MOUSE   | 40S ribosomal protein S23 OS=Mus musculus GN=Rps23 PE=1 SV=3                                           | 463060.6667 | 367465.6667 | -0.346184 | 1.27 | WT-Avg | 3.22E-05 | 4.02E-04 |
| sp P10126 EF1A1_MOUSE  | Elongation factor 1-alpha OS=Mus musculus GN=Eef1a1 PE=1 SV=3                                          | 1820329     | 1455194.667 | -0.33432  | 1.26 | WT-Avg | 3.30E-05 | 4.10E-04 |
| sp P55302 AMRP_MOUSE   | Alpha-2-macroglobulin receptor-associated protein OS=Mus musculus GN=Lrpa1 PE=1 SV=1                   | 210741.6667 | 266634.3333 | 0.3254091 | 1.25 | D5-Avg | 3.31E-05 | 4.10E-04 |
| sp Q555W2 PSME4_MOUSE  | Proteasome activator complex subunit 4 OS=Mus musculus GN=Psme4 PE=1 SV=1                              | 81999.66667 | 65724.66667 | -0.332003 | 1.26 | WT-Avg | 3.35E-05 | 4.13E-04 |
| sp Q8K4L3 SVIL_MOUSE   | Supervillin OS=Mus musculus GN=SVil PE=1 SV=1                                                          | 153879.3333 | 122458.3333 | -0.342002 | 1.27 | WT-Avg | 3.36E-05 | 4.44E-04 |
| sp Q54988 SLK_MOUSE    | STE20-like serine/threonine-protein kinase OS=Mus musculus GN=Slk PE=1 SV=2                            | 73085.66667 | 97840       | 0.4089408 | 1.33 | D5-Avg | 3.66E-05 | 4.45E-04 |
| sp Q9CPR4 RL17_MOUSE   | 60S ribosomal protein L17 OS=Mus musculus GN=Rpl17 PE=1 SV=3                                           | 825840      | 655471.6667 | -0.346092 | 1.27 | WT-Avg | 3.83E-05 | 4.62E-04 |
| sp Q9QZM0 UBQL2_MOUSE  | Ubiquilin-2 OS=Mus musculus GN=Ubqln2 PE=1 SV=2                                                        | 34090.66667 | 47524       | 0.4695958 | 1.38 | D5-Avg | 4.00E-05 | 4.79E-04 |
| sp P70670 NACAM_MOUSE  | Nascent polypeptide-associated complex subunit alpha, muscle-specific form OS=Mus musculus GN=N-       | 4716680.667 | 3435555     | -0.46923  | 1.38 | WT-Avg | 4.35E-05 | 5.20E-04 |
| sp Q91WK2 EIF3H_MOUSE  | Eukaryotic translation initiation factor 3 subunit H OS=Mus musculus GN=EIF3h PE=1 SV=1                | 137240      | 110989      | -0.318056 | 1.25 | WT-Avg | 4.53E-05 | 5.36E-04 |
| sp P90607 DPPP3_MOUSE  | Dipeptidyl peptidase 3 OS=Mus musculus GN=Dpp3 PE=1 SV=2                                               | 577105.3333 | 726143.6667 | 0.3179058 | 1.25 | WT-Avg | 4.66E-05 | 5.49E-04 |
| tr G32972 G3X972_MOUSE | SEC24 related gene family, member C (S. cerevisiae), isoform CRA_a OS=Mus musculus GN=Sec24c PE=1 SV=1 | 91548.33333 | 115345.6667 | 0.3208734 | 1.25 | D5-Avg | 4.68E-05 | 5.49E-04 |
| sp Q9DBE8 ALG2_MOUSE   | Alpha-1,3/1,6-mannosyltransferase ALG2 OS=Mus musculus GN=Alg2 PE=1 SV=2                               | 39014.66667 | 49983       | 0.3405098 | 1.27 | D5-Avg | 5.19E-05 | 6.04E-04 |
| sp Q80K20 RT10_MOUSE   | 28S ribosomal protein S10, mitochondrial OS=Mus musculus GN=Mrs10 PE=1 SV=1                            | 39506.66667 | 52751.66667 | 0.4027408 | 1.32 | D5-Avg | 5.41E-05 | 6.26E-04 |
| sp Q555W2 PSME4_MOUSE  | Proteasome activator complex subunit 4 OS=Mus musculus GN=Psme4 PE=1 SV=1                              | 81999.66667 | 65724.66667 | -0.332003 | 1.26 | WT-Avg | 3.35E-05 | 4.13E-04 |
| sp P97822 AN32E_MOUSE  | Acidic leucine-rich nuclear phosphoprotein 32 family member E OS=Mus musculus GN=Anp32e PE=1 SV=1      | 52703.33333 | 70174.33333 | 0.4031747 | 1.32 | D5-Avg | 5.94E-05 | 6.83E-04 |
| sp Q54988 SLK_MOUSE    | STE20-like serine/threonine-protein kinase OS=Mus musculus GN=Slk PE=1 SV=2                            | 73085.66667 | 97840       | 0.4089408 | 1.33 | D5-Avg | 3.66E-05 | 4.45E-04 |
| sp Q9CPR4 RL17_MOUSE   | 60S ribosomal protein L17 OS=Mus musculus GN=Rpl17 PE=1 SV=3                                           | 825840      | 655471.6667 | -0.346092 | 1.27 | WT-Avg | 3.83E-05 | 4.62E-04 |
| sp Q9QZM0 UBQL2_MOUSE  | Ubiquilin-2 OS=Mus musculus GN=Ubqln2 PE=1 SV=2                                                        | 34090.66667 | 47524       | 0.4695958 | 1.38 | D5-Avg | 4.00E-05 | 4.79E-04 |
| sp P70670 NACAM_MOUSE  | Nascent polypeptide-associated complex subunit alpha, muscle-specific form OS=Mus musculus GN=N-       | 4716680.667 | 3435555     | -0.46923  | 1.38 | WT-Avg | 4.35E-05 | 5.20E-04 |
| sp Q91WK2 EIF3H_MOUSE  | Eukaryotic translation initiation factor 3 subunit H OS=Mus musculus GN=EIF3h PE=1 SV=1                | 137240      | 110989      | -0.318056 | 1.25 | WT-Avg | 4.53E-05 | 5.36E-04 |
| sp P90607 DPPP3_MOUSE  | Dipeptidyl peptidase 3 OS=Mus musculus GN=Dpp3 PE=1 SV=2                                               | 577105.3333 | 726143.6667 | 0.3179058 | 1.25 | WT-Avg | 4.66E-05 | 5.49E-04 |
| tr G32972 G3X972_MOUSE | SEC24 related gene family, member C (S. cerevisiae), isoform CRA_a OS=Mus musculus GN=Sec24c PE=1 SV=1 | 91548.33333 | 115345.6667 | 0.3208734 | 1.25 | D5-Avg | 4.68E-05 | 5.49E-04 |
| sp Q9DBE8 ALG2_MOUSE   | Alpha-1,3/1,6-mannosyltransferase ALG2 OS=Mus musculus GN=Alg2 PE=1 SV=2                               | 39014.66667 | 49983       | 0.3405098 | 1.27 | D5-Avg | 5.19E-05 | 6.04E-04 |
| sp Q80K20 RT10_MOUSE   | 28S ribosomal protein S10, mitochondrial OS=Mus musculus GN=Mrs10 PE=1 SV=1                            | 39506.66667 | 52751.66667 | 0.4027408 | 1.32 | D5-Avg | 5.41E-05 | 6.26E-04 |
| sp Q555W2 PSME4_MOUSE  | Proteasome activator complex subunit 4 OS=Mus musculus GN=Psme4 PE=1 SV=1                              | 81999.66667 | 65724.66667 | -0.332003 | 1.26 | WT-Avg | 3.35E-05 | 4.13E-04 |
| sp P97822 AN32E_MOUSE  | Acidic leucine-rich nuclear phosphoprotein 32 family member E OS=Mus musculus GN=Anp32e PE=1 SV=1      | 52703.33333 | 70174.33333 | 0.4031747 | 1.32 | D5-Avg | 5.94E-05 | 6.83E-04 |
| sp Q54988 SLK_MOUSE    | STE20-like serine/threonine-protein kinase OS=Mus musculus GN=Slk PE=1 SV=2                            | 73085.66667 | 97840       | 0.4089408 | 1.33 | D5-Avg | 3.66E-05 | 4.45E-04 |
| sp Q9CPR4 RL17_MOUSE   | 60S ribosomal protein L17 OS=Mus musculus GN=Rpl17 PE=1 SV=3                                           | 825840      | 655471.6667 | -0.346092 | 1.27 | WT-Avg | 3.83E-05 | 4.62E-04 |
| sp Q9QZM0 UBQL2_MOUSE  | Ubiquilin-2 OS=Mus musculus GN=Ubqln2 PE=1 SV=2                                                        | 34090.66667 | 47524       | 0.4695958 | 1.38 | D5-Avg | 4.00E-05 | 4.79E-04 |
| sp P70670 NACAM_MOUSE  | Nascent polypeptide-associated complex subunit alpha, muscle-specific form OS=Mus musculus GN=N-       | 4716680.667 | 3435555     | -0.46923  | 1.38 | WT-Avg | 4.35E-05 | 5.20E-04 |
| sp Q91WK2 EIF3H_MOUSE  | Eukaryotic translation initiation factor 3 subunit H OS=Mus musculus GN=EIF3h PE=1 SV=1                | 137240      | 110989      | -0.318056 | 1.25 | WT-Avg | 4.53E-05 | 5.36E-04 |
| sp P90607 DPPP3_MOUSE  | Dipeptidyl peptidase 3 OS=Mus musculus GN=Dpp3 PE=1 SV=2                                               | 577105.3333 | 726143.6667 | 0.3179058 | 1.25 | WT-Avg | 4.66E-05 | 5.49E-04 |
| tr G32972 G3X972_MOUSE | SEC24 related gene family, member C (S. cerevisiae), isoform CRA_a OS=Mus musculus GN=Sec24c PE=1 SV=1 | 91548.33333 | 115345.6667 | 0.3208734 | 1.25 | D5-Avg | 4.68E-05 | 5.49E-04 |
| sp Q9DBE8 ALG2_MOUSE   | Alpha-1,3/1,6-mannosyltransferase ALG2 OS=Mus musculus GN=Alg2 PE=1 SV=2                               | 39014.66667 | 49983       | 0.3405098 | 1.27 | D5-Avg | 5.19E-05 | 6.04E-04 |
| sp Q80K20 RT10_MOUSE   | 28S ribosomal protein S10, mitochondrial OS=Mus musculus GN=Mrs10 PE=1 SV=1                            | 39506.66667 | 52751.66667 | 0.4027408 | 1.32 | D5-Avg | 5.41E-05 | 6.26E-04 |
| sp Q555W2 PSME4_MOUSE  | Proteasome activator complex subunit 4 OS=Mus musculus GN=Psme4 PE=1 SV=1                              | 81999.66667 | 65724.66667 | -0.332003 | 1.26 | WT-Avg | 3.35E-05 | 4.13E-04 |
| sp P97822 AN32E_MOUSE  | Acidic leucine-rich nuclear phosphoprotein 32 family member E OS=Mus musculus GN=Anp32e PE=1 SV=1      | 52703.33333 | 70174.33333 | 0.4031747 | 1.32 | D5-Avg | 5.94E-05 | 6.83E-04 |
| sp Q54988 SLK_MOUSE    | STE20-like serine/threonine-protein kinase OS=Mus musculus GN=Slk PE=1 SV=2                            | 73085.66667 | 97840       | 0.4089408 | 1.33 | D5-Avg | 3.66E-05 | 4.45E-04 |
| sp Q9CPR4 RL17_MOUSE   | 60S ribosomal protein L17 OS=Mus musculus GN=Rpl17 PE=1 SV=3                                           | 825840      | 655471.6667 | -0.346092 | 1.27 | WT-Avg | 3.83E-05 | 4.62E-04 |
| sp Q9QZM0 UBQL2_MOUSE  | Ubiquilin-2 OS=Mus musculus GN=Ubqln2 PE=1 SV=2                                                        | 34090.66667 | 47524       | 0.4695958 | 1.38 | D5-Avg | 4.00E-05 | 4.79E-04 |
| sp P70670 NACAM_MOUSE  | Nascent polypeptide-associated complex subunit alpha, muscle-specific form OS=Mus musculus GN=N-       | 4716680.667 | 3435555     | -0.46923  | 1.38 | WT-Avg | 4.35E-05 | 5.20E-04 |
| sp Q91WK2 EIF3H_MOUSE  | Eukaryotic translation initiation factor 3 subunit H OS=Mus musculus GN=EIF3h PE=1 SV=1                | 137240      | 110989      | -0.318056 | 1.25 | WT-Avg | 4.53E-05 | 5.36E-04 |
| sp P90607 DPPP3_MOUSE  | Dipeptidyl peptidase 3 OS=Mus musculus GN=Dpp3 PE=1 SV=2                                               | 577105.3333 | 726143.6667 | 0.3179058 | 1.25 | WT-Avg | 4.66E-05 | 5.49E-04 |
| tr G32972 G3X972_MOUSE | SEC24 related gene family, member C (S. cerevisiae), isoform CRA_a OS=Mus musculus GN=Sec24c PE=1 SV=1 | 91548.33333 | 115345.6667 | 0.3208734 | 1.25 | D5-Avg | 4.68E-05 | 5.49E-04 |
| sp Q9DBE8 ALG2_MOUSE   | Alpha-1,3/1,6-mannosyltransferase ALG2 OS=Mus musculus GN=Alg2 PE=1 SV=2                               | 39014.66667 | 49983       | 0.3405098 | 1.27 | D5-Avg | 5.19E-05 | 6.04E-04 |
| sp Q80K20 RT10_MOUSE   | 28S ribosomal protein S10, mitochondrial OS=Mus musculus GN=Mrs10 PE=1 SV=1                            | 39506.66667 | 52751.66667 | 0.4027408 | 1.32 | D5-Avg | 5.41E-05 | 6.26E-04 |
| sp Q555W2 PSME4_MOUSE  | Proteasome activator complex subunit 4 OS=Mus musculus GN=Psme4 PE=1 SV=1                              | 81999.66667 | 65724.66667 | -0.332003 | 1.26 | WT-Avg | 3.35E-05 | 4.13E-04 |
| sp P97822 AN32E_MOUSE  | Acidic leucine-rich nuclear phosphoprotein 32 family member E OS=Mus musculus GN=Anp32e PE=1 SV=1      | 52703.33333 | 70174.33333 | 0.4031747 | 1.32 | D5-Avg | 5.94E-05 | 6.83E-04 |
| sp Q54988 SLK_MOUSE    | STE20-like serine/threonine-protein kinase OS=Mus musculus GN=Slk PE=1 SV=2                            | 73085.66667 | 97840       | 0.4089408 | 1.33 | D5-Avg | 3.66E-05 | 4.45E-04 |
| sp Q9CPR4 RL17_MOUSE   | 60S ribosomal protein L17 OS=Mus musculus GN=Rpl17 PE=1 SV=3                                           | 825840      | 655471.6667 | -0.346092 | 1.27 | WT-Avg | 3.83E-05 | 4.62E-04 |
| sp Q9QZM0 UBQL2_MOUSE  | Ubiquilin-2 OS=Mus musculus GN=Ubqln2 PE=1 SV=2                                                        | 34090.66667 | 47524       | 0.4695958 | 1.38 | D5-Avg | 4.00E-05 | 4.79E-04 |
| sp P70670 NACAM_MOUSE  | Nascent polypeptide-associated complex subunit alpha, muscle-specific form OS=Mus musculus GN=N-       | 4716680.667 | 3435555     | -0.46923  | 1.38 | WT-Avg | 4.35E-05 | 5.20E-04 |
| sp Q91WK2 EIF3H_MOUSE  | Eukaryotic translation initiation factor 3 subunit H OS=Mus musculus GN=EIF3h PE=1 SV=1                | 137240      | 110989      | -0.318056 | 1.25 | WT-Avg | 4.53E-05 | 5.36E-04 |
| sp P90607 DPPP3_MOUSE  | Dipeptidyl peptidase 3 OS=Mus musculus GN=Dpp3 PE=1 SV=2                                               | 577105.3333 | 726143.6667 | 0.3179058 | 1.25 | WT-Avg | 4        |          |

|                        |                                                                                              |             |             |            |      |        |          |          |
|------------------------|----------------------------------------------------------------------------------------------|-------------|-------------|------------|------|--------|----------|----------|
| sp Q9CRB8 MTFP1_MOUSE  | Mitochondrial fission process protein 1 OS=Mus musculus GN=Mtfp1 PE=1 SV=1                   | 261657      | 209971.3333 | -0.326871  | 1.25 | WT-Avg | 1.44E-03 | 1.00E-02 |
| sp Q9CV16 RT28_MOUSE   | 28S ribosomal protein S28, mitochondrial OS=Mus musculus GN=Mtpr28 PE=1 SV=1                 | 247823.3333 | 161126.6667 | -0.638614  | 1.56 | WT-Avg | 1.45E-03 | 1.01E-02 |
| sp Q922G6 SE11_MOUSE   | Protein sel-1 homolog 1 OS=Mus musculus GN=Sel1l PE=1 SV=2                                   | 6308        | 9731        | 0.6171297  | 1.53 | D5-Avg | 1.57E-03 | 1.08E-02 |
| tr F8VFN4 F8VFN4_MOUSE | Amlyo-1,6-glucosidase, 4-alpha-glucanotransferase OS=Mus musculus GN=Agl PE=1 SV=1           | 14288293.33 | 10915158.33 | -0.401807  | 1.32 | WT-Avg | 1.77E-03 | 1.19E-02 |
| sp Q8C66 PABP2_MOUSE   | Polyadenylate-binding protein 2 OS=Mus musculus GN=Pabnp1 PE=1 SV=3                          | 19668.66667 | 25939.66667 | 0.3895218  | 1.31 | D5-Avg | 1.85E-03 | 1.23E-02 |
| sp P21614 VTDB_MOUSE   | Vitamin D-binding protein OS=Mus musculus GN=Gc PE=1 SV=2                                    | 581802      | 471024      | -0.318687  | 1.25 | WT-Avg | 1.89E-03 | 1.25E-02 |
| sp P68040 RACK1_MOUSE  | Receptor of activated protein C kinase 1 OS=Mus musculus GN=Rack1 PE=1 SV=3                  | 1600745.333 | 1283156.333 | -0.443138  | 1.26 | WT-Avg | 1.93E-03 | 1.26E-02 |
| sp P55012 S12A2_MOUSE  | Solute carrier family 12 member 2 OS=Mus musculus GN=S1c12a2 PE=1 SV=2                       | 91366.66667 | 69953.33333 | -0.40021   | 1.32 | WT-Avg | 1.95E-03 | 1.28E-02 |
| sp P70333 HNRH2_MOUSE  | Heterogeneous nuclear ribonucleoprotein H2 OS=Mus musculus GN=Hnrhp2 PE=1 SV=1               | 21355.33333 | 27232       | 0.33922623 | 1.27 | D5-Avg | 1.96E-03 | 1.28E-02 |
| sp Q3TC93 H1BP3_MOUSE  | HCLS1-binding protein 3 OS=Mus musculus GN=Hs1bp3 PE=1 SV=2                                  | 4890        | 6948.666667 | 0.4976214  | 1.41 | D5-Avg | 2.12E-03 | 1.37E-02 |
| sp Q99LM3 SMTL1_MOUSE  | Smoothelin-like protein 1 OS=Mus musculus GN=Smtl1 PE=1 SV=1                                 | 102630      | 69782.33333 | -0.563155  | 1.48 | WT-Avg | 2.20E-03 | 1.40E-02 |
| sp Q99PU8 DHX30_MOUSE  | Putative ATP-dependent RNA helicase DHX30 OS=Mus musculus GN=Dhx30 PE=1 SV=1                 | 5218.333333 | 7142.666667 | 0.4378663  | 1.35 | D5-Avg | 2.20E-03 | 1.40E-02 |
| sp Q62422 OSTF1_MOUSE  | Osteoclast-stimulating factor 1 OS=Mus musculus GN=Ostf1 PE=1 SV=2                           | 56473       | 72463.66667 | 0.3472319  | 1.27 | D5-Avg | 2.29E-03 | 1.45E-02 |
| sp Q99LN9 DOHH_MOUSE   | Deoxyhypusine hydroxylase OS=Mus musculus GN=Dohh PE=1 SV=2                                  | 11733       | 15140.33333 | 0.3559332  | 1.28 | D5-Avg | 2.34E-03 | 1.47E-02 |
| sp P147964 RL36_MOUSE  | 60S ribosomal protein L36 OS=Mus musculus GN=Rpl36 PE=3 SV=2                                 | 159853.3333 | 124863.3333 | -0.368805  | 1.29 | WT-Avg | 2.43E-03 | 1.53E-02 |
| sp Q5SVRO TBC9B_MOUSE  | TBC1 domain family member 9B OS=Mus musculus GN=Tbc1d9b PE=1 SV=1                            | 24474.33333 | 31638.33333 | 0.3615825  | 1.28 | D5-Avg | 2.80E-03 | 1.72E-02 |
| sp Q9D1C8 VPS28_MOUSE  | Vacuolar protein sorting-associated protein 28 homolog OS=Mus musculus GN=Vps28 PE=1 SV=1    | 26871.33333 | 34090.33333 | 0.3294801  | 1.26 | D5-Avg | 2.83E-03 | 1.74E-02 |
| sp O55222 CHAD_MOUSE   | Chondroadherin OS=Mus musculus GN=Chad PE=2 SV=1                                             | 20165       | 14980.33333 | -0.443695  | 1.36 | WT-Avg | 2.84E-03 | 1.74E-02 |
| sp Q88531 PPT1_MOUSE   | Palmitoyl-protein thioesterase 1 OS=Mus musculus GN=Ppt1 PE=1 SV=2                           | 30496.66667 | 38516.66667 | 0.3239233  | 1.25 | D5-Avg | 2.90E-03 | 1.76E-02 |
| sp Q8R0H9 GGA1_MOUSE   | ADP-ribosylation factor-binding protein GGA1 OS=Mus musculus GN=Gga1 PE=1 SV=1               | 18620.33333 | 23638.66667 | 0.3312486  | 1.26 | WT-Avg | 2.91E-03 | 1.77E-02 |
| sp P26645 MARCS_MOUSE  | Myristoylated alanine-rich C-kinase substrate OS=Mus musculus GN=Marcks PE=1 SV=2            | 97385.66667 | 73947       | -0.411904  | 1.33 | WT-Avg | 2.93E-03 | 1.78E-02 |
| sp Q99WJ3 CBPQ_MOUSE   | Carboxypeptidase Q OS=Mus musculus GN=Cqp PE=1 SV=1                                          | 15726       | 20212.33333 | 0.3511354  | 1.28 | D5-Avg | 2.95E-03 | 1.78E-02 |
| tr B1AR72 B1AR72_MOUSE | Vacuolar protein sorting 13D OS=Mus musculus GN=Vps13d PE=1 SV=2                             | 9697.666667 | 12459.33333 | 0.3497323  | 1.27 | D5-Avg | 3.15E-03 | 1.89E-02 |
| sp P97449 AMPN_MOUSE   | Aminopeptidase N OS=Mus musculus GN=Anpep PE=1 SV=4                                          | 84316       | 63458.33333 | -0.42225   | 1.34 | WT-Avg | 3.16E-03 | 1.90E-02 |
| sp Q3QVVK ERMP1_MOUSE  | Endoplasmic reticulum metallopeptidase 1 OS=Mus musculus GN=Ermp1 PE=1 SV=2                  | 21204.33333 | 27493       | 0.3611848  | 1.28 | D5-Avg | 3.18E-03 | 1.90E-02 |
| sp Q9CF29 ABC6_MOUSE   | ATP-binding cassette sub-family B member 6, mitochondrial OS=Mus musculus GN=Abcb6 PE=1 SV=1 | 19977       | 16129.33333 | -0.320254  | 1.25 | WT-Avg | 3.27E-03 | 1.95E-02 |
| sp Q6P5H2 NEST_MOUSE   | Nestin OS=Mus musculus GN=Nes PE=1 SV=1                                                      | 29525.33333 | 21249.66667 | -0.484513  | 1.40 | WT-Avg | 3.40E-03 | 2.01E-02 |
| sp Q9WTK7 STK11_MOUSE  | Serine/threonine-protein kinase STK11 OS=Mus musculus GN=Stk11 PE=1 SV=1                     | 4144.333333 | 6097.666667 | 0.5425624  | 1.46 | D5-Avg | 3.58E-03 | 2.10E-02 |
| sp Q91YN9 BAG2_MOUSE   | BAG family molecular chaperone regulator 2 OS=Mus musculus GN=Bag2 PE=1 SV=1                 | 54520       | 69200       | 0.3298261  | 1.26 | D5-Avg | 3.66E-03 | 2.13E-02 |
| sp P70336 ROCK2_MOUSE  | Rho-associated protein kinase 2 OS=Mus musculus GN=Rock2 PE=1 SV=1                           | 13207       | 16729.66667 | 0.3277271  | 1.26 | D5-Avg | 4.19E-03 | 2.38E-02 |
| sp Q3UPH1 PRRC1_MOUSE  | Protein PRRC1 OS=Mus musculus GN=Prrc1 PE=1 SV=1                                             | 25523.33333 | 20594.33333 | -0.319499  | 1.25 | WT-Avg | 4.58E-03 | 2.54E-02 |
| sp O55143 AT2A2_MOUSE  | Sarcoplasmic/endoplasmic reticulum calcium ATPase 2 OS=Mus musculus GN=Atp2a2 PE=1 SV=2      | 109482.3333 | 153081      | 0.4748667  | 1.39 | D5-Avg | 4.71E-03 | 2.60E-02 |
| sp P80821 CO3A1_MOUSE  | Collagen alpha-1(III) chain OS=Mus musculus GN=Col3a1 PE=1 SV=4                              | 115917.6667 | 170279      | 0.5385906  | 1.45 | D5-Avg | 4.72E-03 | 2.60E-02 |
| sp P60840 ENSA_MOUSE   | Alpha-endosulfine OS=Mus musculus GN=Ensa PE=1 SV=1                                          | 46306.66667 | 58680       | 0.3257226  | 1.25 | D5-Avg | 4.85E-03 | 2.65E-02 |
| sp Q9JAA4 WDR12_MOUSE  | Ribosome biogenesis protein WDR12 OS=Mus musculus GN=Wdr12 PE=1 SV=1                         | 11469.66667 | 14420       | 0.3179024  | 1.25 | D5-Avg | 4.93E-03 | 2.68E-02 |
| sp Q92162 MINP1_MOUSE  | Multiple inositol polyphosphate phosphatase 1 OS=Mus musculus GN=Minpp1 PE=1 SV=3            | 22416       | 28579.33333 | 0.339156   | 1.27 | D5-Avg | 4.94E-03 | 2.69E-02 |
| sp P11970 TPM3_MOUSE   | Tropomyosin alpha-3 chain OS=Mus musculus GN=Tpm3 PE=1 SV=3                                  | 59144.33333 | 92864.66667 | 0.6411332  | 1.56 | D5-Avg | 5.05E-03 | 2.73E-02 |
| sp Q9Z1T2 TSP4_MOUSE   | Thrombospondin-4 OS=Mus musculus GN=Thbs4 PE=1 SV=1                                          | 1041015.667 | 836996      | -0.324218  | 1.25 | WT-Avg | 5.59E-03 | 2.97E-02 |
| sp O70373 XIRP1_MOUSE  | Xin actin-binding repeat-containing protein 1 OS=Mus musculus GN=Xirp1 PE=1 SV=2             | 660671.6667 | 432500.3333 | -0.618743  | 1.54 | WT-Avg | 5.99E-03 | 3.13E-02 |
| sp A6H584 C60A5_MOUSE  | Collagen alpha-5(VI) chain OS=Mus musculus GN=Col6a5 PE=1 SV=4                               | 13140.33333 | 63708.33333 | 0.272001   | 4.83 | D5-Avg | 6.10E-03 | 3.17E-02 |
| sp Q01063 PDE4D_MOUSE  | cAMP-specific 3',5'-cyclic phosphodiesterase 4D OS=Mus musculus GN=Pde4d PE=1 SV=2           | 13520.66667 | 10624.66667 | -0.359871  | 1.28 | WT-Avg | 6.41E-03 | 3.32E-02 |
| sp Q9B8Z3 CLP1_MOUSE   | Cleft lip and palate transmembrane protein 1 homolog OS=Mus musculus GN=Clp1 PE=1 SV=1       | 62976.66667 | 82476       | 0.3748568  | 1.30 | D5-Avg | 6.42E-03 | 3.32E-02 |
| sp Q8OUJ7 RB3GP_MOUSE  | Rab3 GTPase-activating protein catalytic subunit OS=Mus musculus GN=Rab3gap1 PE=1 SV=4       | 9459.333333 | 12230.66667 | 0.360488   | 1.28 | D5-Avg | 6.57E-03 | 3.39E-02 |
| sp P11930 NUD19_MOUSE  | Nucleoside diphosphate-linked moiety X motif 19 OS=Mus musculus GN=Nud19 PE=1 SV=2           | 13617.66667 | 18043       | 0.3981424  | 1.32 | D5-Avg | 6.77E-03 | 3.48E-02 |
| sp Q8OUY1 CARME_MOUSE  | Carnosine N-methyltransferase OS=Mus musculus GN=Carmnt1 PE=1 SV=1                           | 694334.3333 | 546161      | -0.360338  | 1.28 | WT-Avg | 6.87E-03 | 3.52E-02 |
| sp Q9VCR8 MYLK2_MOUSE  | Myosin light chain kinase 2, skeletal/cardiac muscle OS=Mus musculus GN=Myk2 PE=1 SV=2       | 6195590.333 | 4419238     | -0.505256  | 1.42 | WT-Avg | 6.96E-03 | 3.52E-02 |
| sp Q91231 PTBP2_MOUSE  | Poly(pyrimidine tract)-binding protein 2 OS=Mus musculus GN=Ptbp2 PE=1 SV=2                  | 10078.66667 | 12694.33333 | 0.3202616  | 1.25 | D5-Avg | 7.95E-03 | 3.80E-02 |
| sp Q7TN98 CPEB4_MOUSE  | Cytoplasmic polyadenylation element-binding protein 4 OS=Mus musculus GN=Cpeb4 PE=1 SV=1     | 16985       | 13628       | -0.328733  | 1.26 | WT-Avg | 7.76E-03 | 3.95E-02 |
| sp A2AUC9 KLH41_MOUSE  | Kelch-like protein 41 OS=Mus musculus GN=Klhl41 PE=1 SV=1                                    | 4959219.333 | 3890353     | -0.361406  | 1.28 | WT-Avg | 8.25E-03 | 4.03E-02 |
| sp Q9CR41 HYPK_MOUSE   | Huntingtin-interacting protein K OS=Mus musculus GN=Hykp PE=1 SV=2                           | 60435       | 77048.66667 | 0.3393027  | 1.27 | D5-Avg | 8.29E-03 | 4.04E-02 |
| sp Q9D0B6 PBDCl_MOUSE  | Protein PBDCl OS=Mus musculus GN=Pbdcl PE=1 SV=1                                             | 14700       | 18606.66667 | 0.3271743  | 1.25 | D5-Avg | 1.01E-02 | 4.76E-02 |
| sp Q9QZ26 DERM_MOUSE   | Dermatopontin OS=Mus musculus GN=Dpt PE=1 SV=1                                               | 134853      | 183585.6667 | 0.4295064  | 1.35 | D5-Avg | 1.16E-02 | 5.33E-02 |
| sp P40936 INMT_MOUSE   | Indolethylamine N-methyltransferase OS=Mus musculus GN=Inmt PE=1 SV=1                        | 120796.6667 | 155976.6667 | 0.3532688  | 1.28 | D5-Avg | 1.28E-02 | 5.83E-02 |
| sp Q9Z2D0 MTMR9_MOUSE  | Myotubularin-related protein 9 OS=Mus musculus GN=Mtmr9 PE=1 SV=2                            | 12452.66667 | 22904.66667 | 0.8618089  | 1.82 | D5-Avg | 1.42E-02 | 6.33E-02 |
| sp P62897 CYC_MOUSE    | Cytochrome c, somatic OS=Mus musculus GN=Cycs PE=1 SV=1                                      | 5462693     | 4356900.333 | 0.3635525  | 1.26 | WT-Avg | 1.49E-02 | 6.56E-02 |
| sp Q8BYM8 SYCM_MOUSE   | Probable cysteine-tRNA ligase, mitochondrial OS=Mus musculus GN=Cars2 PE=1 SV=2              | 10860.66667 | 13792.33333 | 0.3322948  | 1.26 | D5-Avg | 1.50E-02 | 6.57E-02 |
| sp Q5VU3K RABL6_MOUSE  | Rab-like protein 6 OS=Mus musculus GN=Rabl6 PE=1 SV=2                                        | 10589.66667 | 13775       | 0.3700837  | 1.29 | D5-Avg | 1.57E-02 | 6.86E-02 |
| sp Q9D1G5 LRCS7_MOUSE  | Leucine-rich repeat-containing protein 57 OS=Mus musculus GN=Lrcc7 PE=1 SV=1                 | 32676.66667 | 56076       | 0.7619983  | 1.70 | D5-Avg | 2.01E-02 | 8.30E-02 |
| tr E90711 E90711_MOUSE | Collagen, type XVII, alpha 1 OS=Mus musculus GN=Col22a1 PE=1 SV=1                            | 17814.33333 | 22516.33333 | 0.3221452  | 1.25 | D5-Avg | 2.36E-02 | 9.32E-02 |
| sp A6H8H2 DENM4_MOUSE  | DENN domain-containing protein 4C OS=Mus musculus GN=Dennd4c PE=1 SV=1                       | 11289.66667 | 14648       | 0.3642585  | 1.29 | D5-Avg | 2.44E-02 | 9.60E-02 |
| sp P70290 EM55_MOUSE   | 55 kDa erythrocyte membrane protein OS=Mus musculus GN=Mpp1 PE=1 SV=1                        | 45213       | 56825       | 0.3184825  | 1.25 | D5-Avg | 2.45E-02 | 9.60E-02 |

| Accession              | Description                                                                             | WT-Avg      | D3-Avg      | logFC     | fold change | up in  | PValue   | FDR      |
|------------------------|-----------------------------------------------------------------------------------------|-------------|-------------|-----------|-------------|--------|----------|----------|
| sp Q7TPW1 NEXN_MOUSE   | Nexilin OS=Mus musculus GN=Nxn PE=1 SV=3                                                | 205358.6667 | 104132      | -9.58E-01 | 1.94        | WT-Avg | 4.25E-24 | 1.17E-20 |
| sp Q8BUZ1 ABRA_MOUSE   | Actin-binding Rho-activating protein OS=Mus musculus GN=Abra PE=1 SV=1                  | 218693      | 407583.3333 | 9.24E-01  | 1.90        | D5-Avg | 8.36E-22 | 1.15E-18 |
| sp P62932 FBX40_MOUSE  | F-box only protein 40 OS=Mus musculus GN=Fbxo40 PE=1 SV=1                               | 114422.6667 | 67450.33333 | -7.39E-01 | 1.67        | WT-Avg | 8.66E-21 | 7.93E-18 |
| sp Q60949 TBCD1_MOUSE  | TBC1 domain family member 1 OS=Mus musculus GN=Tbcd1 PE=1 SV=3                          | 343528      | 206361.3333 | -7.15E-01 | 1.64        | WT-Avg | 1.09E-17 | 7.50E-17 |
| sp Q6ZP99 KBP_MOUSE    | KIF1-binding protein OS=Mus musculus GN=Kif1bp PE=1 SV=2                                | 31380       | 52283.33333 | 7.60E-01  | 1.69        | D5-Avg | 3.37E-17 | 1.85E-14 |
| sp Q9JG01 TACC2_MOUSE  | Transforming acidic coiled-coil-containing protein 2 OS=Mus musculus GN=Tacc2 PE=1 SV=2 | 57067.33333 | 32917.33333 | -7.75E-01 | 1.71        | WT-Avg | 4.12E-17 | 1.89E-14 |
| sp P11505 GLNA_MOUSE   | Glutamine synthetase OS=Mus musculus GN=Glul PE=1 SV=6                                  | 220566.3333 | 130040      | -7.38E-01 | 1.67        | WT-Avg | 6.21E-14 | 2.43E-11 |
| sp E9QA62 LMOD3_MOUSE  | Leiomodin-3 OS=Mus musculus GN=Lmod3 PE=1 SV=1                                          | 75453.33333 | 45463.33333 | -7.07E-01 | 1.63        | WT-Avg | 6.13E-12 | 2.10E-09 |
| sp Q99111 IMSTN1_MOUSE | Musculoskeletal embryonic nuclear protein 1 OS=Mus musculus GN=Imstn1 PE=1 SV=1         | 276840      | 98241.66667 | -1.46E+00 | 2.75        | WT-Avg | 3.69E-11 | 1.13E-08 |
| sp Q9CXW3 CYBP_MOUSE   | Calcyclin-binding protein OS=Mus musculus GN=Cacypb PE=1 SV=1                           | 131456.6667 | 187476.6667 | 5.33E-01  | 1.45        | D5-Avg | 2.63E-10 | 7.21E-08 |
| sp P35385 HSPB7_MOUSE  | Heat shock protein beta-7 OS=Mus musculus GN=Hspb7 PE=1 SV=3                            | 1411940     | 610485      | -8.77E-01 | 1.84        | WT-Avg | 1.17E-09 | 2.92E-07 |
| sp Q7M729 SCN4B_MOUSE  | Sodium channel subunit beta-4 OS=Mus musculus GN=Scn4b PE=1 SV=1                        | 372933.3333 | 247156.6667 | -5.74E-01 | 1.49        | WT-Avg | 1.81E-09 | 4.14E-07 |
| sp Q8RL93 YBOX3_MOUSE  | Y-box-binding protein 3 OS=Mus musculus GN=Ybx3 PE=1 SV=2                               | 298423.3333 | 188363.3333 | -6.45E-01 | 1.56        | WT-Avg | 2.12E-09 | 4.45E-07 |
| sp Q8VE91 RETR1_MOUSE  | Reticulophagy regulator 1 OS=Mus musculus GN=Retrg1 PE=1 SV=2                           | 41030.66667 | 27225.66667 | -5.68E-01 | 1.48        | WT-Avg | 2.66E-09 | 4.87E-07 |
| sp O70209 PDLI3_MOUSE  | PDZ and LIM domain protein 3 OS=Mus musculus GN=Pdlim3 PE=1 SV=1                        | 2427618     | 1691527.333 | -4.97E-01 | 1.41        | WT-Avg | 3.62E-09 | 4.87E-07 |
| sp P0C511 SBK2_MOUSE   | Serine/threonine-protein kinase SBK2 OS=Mus musculus GN=Skb2 PE=3 SV=2                  | 378886.6667 | 266720      | -4.82E-01 | 1.40        | WT-Avg | 2.26E-09 | 5.59E-07 |
| sp Q9D783 KLH40_MOUSE  | Kelch-like protein 40 OS=Mus musculus GN=Klhl40 PE=1 SV=1                               | 1092173.333 | 681602.3333 | -6.55E-01 | 1.57        | WT-Avg | 4.95E-09 | 7.99E-07 |
| sp Q80X84 NRAP_MOUSE   | Nebulin-related-anchoring protein OS=Mus musculus GN=Nrap PE=1 SV=3                     | 1569441.333 | 846637      | -8.66E-01 | 1.82        | WT-Avg | 1.35E-08 | 2.06E-06 |
| sp P50462 CSR3P_MOUSE  | Cysteine and glycine-rich protein 3 OS=Mus musculus GN=Csr3p PE=1 SV=1                  | 429137      | 218917.3333 | -9.44E-01 | 1.92        | WT-Avg | 2.01E-08 | 2.91E-06 |
| sp Q8BWA5 KLH31_MOUSE  | Kelch-like protein 31 OS=Mus musculus GN=Klhl31 PE=1 SV=1                               | 147511.6667 | 98411.66667 | -5.65E-01 | 1.48        | WT-Avg | 2.14E-08 | 2.94E-06 |
| sp Q921U8 SMTN_MOUSE   | Smoothelin OS=Mus musculus GN=Smtn PE=1 SV=2                                            | 161383.6667 | 116170.3333 | -4.53E-01 | 1.37        | WT-Avg | 2.28E-08 | 2.97E-06 |
| sp Q89114 DNJB5_MOUSE  | Dnal homolog subfamily B member 5 OS=Mus musculus GN=Dnajb5 PE=2 SV=1                   | 146768      | 104         |           |             |        |          |          |

|                        |                                                                                                   |             |             |           |      |        |          |          |
|------------------------|---------------------------------------------------------------------------------------------------|-------------|-------------|-----------|------|--------|----------|----------|
| sp P51150 RAB7A_MOUSE  | Ras-related protein Rab-7a OS=Mus musculus GN=Rab7a PE=1 SV=2                                     | 645346      | 491568.6667 | -3.72E-01 | 1.29 | WT-Avg | 1.02E-06 | 7.78E-05 |
| sp P97447 FHL1_MOUSE   | Four and a half LIM domains protein 1 OS=Mus musculus GN=Fhl1 PE=1 SV=3                           | 21126859    | 13744655    | -5.95E-01 | 1.51 | WT-Avg | 1.88E-06 | 1.40E-04 |
| sp Q61702 ITIH1_MOUSE  | Inter-alpha-trypsin inhibitor heavy chain H1 OS=Mus musculus GN=Itih1 PE=1 SV=2                   | 151372.6667 | 113215.3333 | -3.96E-01 | 1.32 | WT-Avg | 2.20E-06 | 1.59E-04 |
| sp Q9D1K2 VATF_MOUSE   | V-type proton ATPase subunit F OS=Mus musculus GN=Atpv6f1f PE=1 SV=2                              | 42824.66667 | 57326.66667 | -4.46E-01 | 1.36 | D5-Avg | 2.55E-06 | 1.79E-04 |
| sp Q9WV06 ANKRD2_MOUSE | Ankyrin repeat domain-containing protein 2 OS=Mus musculus GN=Ankrd2 PE=1 SV=3                    | 1356584.667 | 734699.3333 | -8.56E-01 | 1.81 | WT-Avg | 2.81E-06 | 1.93E-04 |
| sp Q8BK84 DUPD1_MOUSE  | Dual specificity phosphatase DUPD1 OS=Mus musculus GN=Dupd1 PE=2 SV=1                             | 69460       | 98900       | 5.33E-01  | 1.45 | D5-Avg | 2.99E-06 | 2.00E-04 |
| tr E9PYF4 E9PYF4_MOUSE | LIM domain only 7 OS=Mus musculus GN=Lmo7 PE=1 SV=1                                               | 59878       | 45316       | -3.79E-01 | 1.30 | WT-Avg | 5.47E-06 | 3.57E-04 |
| tr E0CYV9 E0CYV9_MOUSE | RIKEN cDNA 1110002E22 gene OS=Mus musculus GN=1110002E22Rik PE=1 SV=1                             | 20162.33333 | 13487.66667 | -5.62E-01 | 1.48 | WT-Avg | 7.11E-06 | 4.54E-04 |
| sp Q8CI12 SMTL2_MOUSE  | Smoothelin-like protein 2 OS=Mus musculus GN=Smtl2 PE=1 SV=1                                      | 563046.6667 | 399249      | -4.74E-01 | 1.39 | WT-Avg | 1.06E-06 | 4.68E-04 |
| sp P14602 HSPB1_MOUSE  | Heat shock protein beta-1 OS=Mus musculus GN=Hspb1 PE=1 SV=3                                      | 2869981     | 1856156     | -6.02E-01 | 1.52 | WT-Avg | 1.10E-05 | 6.54E-04 |
| sp Q8BQM4 HEAT3_MOUSE  | HEAT repeat-containing protein 3 OS=Mus musculus GN=Heatr3 PE=1 SV=1                              | 6812.66667  | 10036.66667 | -5.84E-01 | 1.50 | D5-Avg | 1.44E-05 | 8.43E-04 |
| sp Q6PEE3 RR2B_MOUSE   | Ribonucleoside-diphosphate reductase subunit M2 B OS=Mus musculus GN=Rrm2b PE=1 SV=1              | 11960.33333 | 16216.33333 | -4.61E-01 | 1.38 | D5-Avg | 2.82E-05 | 1.58E-03 |
| sp Q8K268 ABCF3_MOUSE  | ATP-binding cassette sub-family F member 3 OS=Mus musculus GN=Abcf3 PE=1 SV=1                     | 77729       | 95272       | -3.17E-01 | 1.25 | D5-Avg | 4.04E-05 | 2.18E-03 |
| sp A6X935 ITIH4_MOUSE  | Inter-alpha-trypsin inhibitor, heavy chain 4 OS=Mus musculus GN=Itih4 PE=1 SV=2                   | 323517      | 211947.3333 | -5.82E-01 | 1.50 | WT-Avg | 4.56E-05 | 2.39E-03 |
| sp Q9D2R6 COA3_MOUSE   | Cytochrome c oxidase assembly factor 3 homolog, mitochondrial OS=Mus musculus GN=Coa3 PE=1 SV=1   | 107444      | 136140      | -3.62E-01 | 1.29 | D5-Avg | 5.16E-05 | 2.63E-03 |
| sp Q8VD88 LRRC2_MOUSE  | Leucine-rich repeat-containing protein 2 OS=Mus musculus GN=Lrrc2 PE=2 SV=1                       | 57700.66667 | 44840       | -3.40E-01 | 1.27 | WT-Avg | 5.37E-05 | 2.68E-03 |
| sp A2AWA9 RBGP1_MOUSE  | Rab GTPase-activating protein 1 OS=Mus musculus GN=Rabgap1 PE=1 SV=1                              | 8179        | 12373.66667 | -6.20E-01 | 1.54 | D5-Avg | 8.14E-05 | 3.72E-03 |
| sp E9TQH0 ATX2L_MOUSE  | Ataxin-2-like protein OS=Mus musculus GN=Atxn2l PE=1 SV=1                                         | 17557       | 23028       | -4.10E-01 | 1.33 | D5-Avg | 8.98E-05 | 3.98E-03 |
| sp Q61543 GSLG1_MOUSE  | Golgi apparatus protein 1 OS=Mus musculus GN=Glg1 PE=1 SV=1                                       | 42726.33333 | 52877.66667 | -3.29E-01 | 1.26 | D5-Avg | 8.89E-05 | 3.98E-03 |
| sp O70373 XIRP1_MOUSE  | Xin actin-binding repeat-containing protein 1 OS=Mus musculus GN=Xirp1 PE=1 SV=2                  | 660671.6667 | 355698.6667 | -8.69E-01 | 1.83 | WT-Avg | 1.06E-04 | 4.62E-03 |
| sp Q3UZA1 CP2IP_MOUSE  | Cap2-interacting protein OS=Mus musculus GN=Rcsd1 PE=1 SV=1                                       | 94126.66667 | 72826       | -3.47E-01 | 1.27 | WT-Avg | 1.11E-04 | 4.70E-03 |
| sp P0CBW02 LY6C1_MOUSE | Lymphocyte antigen 6C1 OS=Mus musculus GN=Ly6c1 PE=2 SV=1                                         | 128569.3333 | 99602.66667 | -3.45E-01 | 1.27 | WT-Avg | 1.10E-04 | 4.70E-03 |
| sp Q8BG95 MYPT2_MOUSE  | Protein phosphatase 1 regulatory subunit 12B OS=Mus musculus GN=Ppp1r12b PE=1 SV=2                | 474219.6667 | 335806.6667 | -4.82E-01 | 1.40 | WT-Avg | 1.24E-04 | 5.18E-03 |
| sp O09012 PEXS5_MOUSE  | Peroxisomal targeting signal 1 receptor OS=Mus musculus GN=Pex5 PE=1 SV=2                         | 7827.66667  | 11088.33333 | -5.21E-01 | 1.44 | D5-Avg | 1.32E-04 | 5.32E-03 |
| sp Q07456 AMBP_MOUSE   | Protein AMBP OS=Mus musculus GN=Ambp PE=1 SV=2                                                    | 94463.33333 | 72937.66667 | -3.50E-01 | 1.27 | WT-Avg | 1.32E-04 | 5.32E-03 |
| sp Q9D2R6 S10AA_MOUSE  | Protein S100-A10 OS=Mus musculus GN=S100a10 PE=1 SV=2                                             | 197980      | 154573.3333 | -3.38E-01 | 1.26 | WT-Avg | 1.39E-04 | 5.15E-03 |
| sp Q6N2B0 DNJC8_MOUSE  | Dnaj homolog subfamily C member 8 OS=Mus musculus GN=Dnajc8 PE=1 SV=2                             | 75983.33333 | 94326.66667 | -3.36E-01 | 1.26 | D5-Avg | 1.50E-04 | 5.86E-03 |
| sp Q60648 SAP3_MOUSE   | Ganglioside GM2 activator OS=Mus musculus GN=Gm2a PE=1 SV=2                                       | 10157.33333 | 13716.33333 | -4.52E-01 | 1.37 | D5-Avg | 1.78E-04 | 6.79E-03 |
| sp O54988 SLK_MOUSE    | STE20-like serine/threonine-protein kinase OS=Mus musculus GN=Slk PE=1 SV=2                       | 73085.66667 | 94291       | -3.88E-01 | 1.31 | D5-Avg | 2.29E-04 | 8.61E-03 |
| sp Q8BYL4 SYMM_MOUSE   | Tyrosine-tRNA ligase, mitochondrial OS=Mus musculus GN=Yars2 PE=1 SV=2                            | 31888.66667 | 40306.66667 | -3.62E-01 | 1.29 | D5-Avg | 2.33E-04 | 8.66E-03 |
| sp P01872 IGHM_MOUSE   | Ig mu chain C region OS=Mus musculus GN=Ighm PE=1 SV=2                                            | 51788.33333 | 37478       | -4.42E-01 | 1.36 | WT-Avg | 2.46E-04 | 8.87E-03 |
| sp Q9D832 DNJB4_MOUSE  | Dnaj homolog subfamily B member 4 OS=Mus musculus GN=Dnajb4 PE=1 SV=1                             | 1010974.333 | 774075.3333 | -3.59E-01 | 1.28 | WT-Avg | 2.59E-04 | 9.23E-03 |
| sp Q692N7 MYOF_MOUSE   | Myoferlin OS=Mus musculus GN=Myof PE=1 SV=2                                                       | 21325.33333 | 16286.33333 | -3.69E-01 | 1.29 | WT-Avg | 3.06E-04 | 1.06E-02 |
| sp Q9CG11 CHAC2_MOUSE  | Putative glutathione-specific gamma-glutamylcyclotransferase 2 OS=Mus musculus GN=Chac2 PE=1 SV=1 | 35087.33333 | 27010       | -3.57E-01 | 1.28 | WT-Avg | 3.39E-04 | 1.16E-02 |
| sp P01027 CO3_MOUSE    | Complement C3 OS=Mus musculus GN=C3 PE=1 SV=3                                                     | 3330627     | 2434722     | -4.29E-01 | 1.35 | WT-Avg | 4.23E-04 | 1.40E-02 |
| sp Q80X13 IF4G3_MOUSE  | Eukaryotic translation initiation factor 4 gamma 3 OS=Mus musculus GN=Eif4g3 PE=1 SV=2            | 41523.33333 | 31656.66667 | -3.68E-01 | 1.29 | WT-Avg | 4.60E-04 | 1.47E-02 |
| sp Q9JH05 LZT1L_MOUSE  | Leucine zipper transcription factor-like protein 1 OS=Mus musculus GN=Lztl1 PE=1 SV=1             | 31699.66667 | 39229.66667 | -3.32E-01 | 1.26 | D5-Avg | 6.21E-04 | 1.85E-02 |
| sp P23927 CRYAB_MOUSE  | Alpha-crystallin B chain OS=Mus musculus GN=Cryab PE=1 SV=2                                       | 10846422.67 | 6989370     | -6.06E-01 | 1.52 | WT-Avg | 6.88E-04 | 1.99E-02 |
| sp Q60973 RBBP7_MOUSE  | Histone-binding protein RBBP7 OS=Mus musculus GN=Rbbp7 PE=1 SV=1                                  | 62783.33333 | 78843.33333 | -3.48E-01 | 1.27 | D5-Avg | 7.00E-04 | 2.00E-02 |
| sp Q8VCH8 UBXN4_MOUSE  | UBX domain-containing protein 4 OS=Mus musculus GN=Ubxn4 PE=1 SV=1                                | 18622       | 22999       | -3.27E-01 | 1.25 | D5-Avg | 7.38E-04 | 2.07E-02 |
| sp Q80U09 PGRC2_MOUSE  | Membrane-associated progesterone receptor component 2 OS=Mus musculus GN=Pgrmc2 PE=1 SV=2         | 14026.33333 | 17646       | -3.52E-01 | 1.28 | D5-Avg | 7.55E-04 | 2.09E-02 |
| sp Q8VIB3 SIA1O_MOUSE  | Type 2 lactosamine alpha-2,3-sialyltransferase OS=Mus musculus GN=St3gal6 PE=2 SV=3               | 17507.33333 | 12206.66667 | -4.97E-01 | 1.41 | WT-Avg | 9.23E-04 | 2.48E-02 |
| sp Q9Z2D0 MTMR9_MOUSE  | Myotubularin-related protein 9 OS=Mus musculus GN=Mtmr9 PE=1 SV=2                                 | 12452.66667 | 21051       | -7.74E-01 | 1.71 | D5-Avg | 9.34E-04 | 2.49E-02 |
| sp Q3TC93 H1BP3_MOUSE  | HCLS1-binding protein 3 OS=Mus musculus GN=Hs1bp3 PE=1 SV=2                                       | 4890        | 6930.333333 | -5.26E-01 | 1.44 | D5-Avg | 9.86E-04 | 2.60E-02 |
| sp Q920M5 CORO6_MOUSE  | Coronin-6 OS=Mus musculus GN=Coro6 PE=1 SV=1                                                      | 396253.3333 | 312350      | -3.17E-01 | 1.25 | WT-Avg | 1.07E-03 | 2.77E-02 |
| sp Q62417 SRBS1_MOUSE  | Sorbin and SH3 domain-containing protein 1 OS=Mus musculus GN=Sorbs1 PE=1 SV=2                    | 96999.33333 | 77310       | -3.45E-01 | 1.27 | WT-Avg | 1.20E-03 | 3.06E-02 |
| sp Q8VEE1 LMCD1_MOUSE  | LIM and cysteine-rich domains protein 1 OS=Mus musculus GN=Lmcd1 PE=1 SV=1                        | 2495010.667 | 1808197     | -4.37E-01 | 1.35 | WT-Avg | 1.25E-03 | 3.15E-02 |
| sp P61290 PSME3_MOUSE  | Proteasome activator complex subunit 3 OS=Mus musculus GN=Psmc3 PE=1 SV=1                         | 56463.66667 | 69610.66667 | -3.22E-01 | 1.25 | D5-Avg | 1.28E-03 | 3.18E-02 |
| sp Q06770 CBG_MOUSE    | Corticosteroid-binding globulin OS=Mus musculus GN=Serpin6 PE=1 SV=1                              | 41094       | 30891.66667 | -3.88E-01 | 1.31 | WT-Avg | 1.52E-03 | 3.65E-02 |
| sp P49222 EPB42_MOUSE  | Erythrocyte membrane protein band 4.2 OS=Mus musculus GN=Epb42 PE=1 SV=3                          | 64103.33333 | 47757       | -3.99E-01 | 1.32 | WT-Avg | 2.03E-03 | 4.63E-02 |
| sp Q80Y55 BSDC1_MOUSE  | BSD domain-containing protein 1 OS=Mus musculus GN=Bsdcl1 PE=1 SV=1                               | 8429.333333 | 10884.66667 | -3.94E-01 | 1.31 | D5-Avg | 2.07E-03 | 4.66E-02 |
| sp Q61646 HPT_MOUSE    | Haptoglobin OS=Mus musculus GN=Hp PE=1 SV=1                                                       | 112587.6667 | 208106.6667 | -9.08E-01 | 1.88 | D5-Avg | 2.32E-03 | 4.94E-02 |
| sp Q99K01 PDXD1_MOUSE  | Pyridoxal-dependent decarboxylase domain-containing protein 1 OS=Mus musculus GN=Pdxdc1 PE=1 SV=1 | 5989.66667  | 8074        | -4.51E-01 | 1.37 | D5-Avg | 2.44E-03 | 5.12E-02 |
| sp Q02844 TRYB1_MOUSE  | Tryptase OS=Mus musculus GN=Tpsab1 PE=2 SV=1                                                      | 26716.66667 | 20417       | -3.70E-01 | 1.29 | WT-Avg | 2.85E-03 | 5.76E-02 |
| sp Q8BLR9 HIF1N_MOUSE  | Hypoxia-inducible factor 1-alpha inhibitor OS=Mus musculus GN=Hif1an PE=1 SV=2                    | 22385.33333 | 28721       | -3.84E-01 | 1.30 | D5-Avg | 3.37E-03 | 6.74E-02 |
| sp Q80A19 COE1A_MOUSE  | Collagen alpha-1(XIV) chain OS=Mus musculus GN=Col14a1 PE=1 SV=2                                  | 103958.6667 | 80917.66667 | -3.44E-01 | 1.27 | WT-Avg | 3.46E-03 | 6.88E-02 |
| sp A2ABU4 MYOM3_MOUSE  | Myomesin-3 OS=Mus musculus GN=Myom3 PE=1 SV=1                                                     | 2925400     | 2160929.333 | -4.16E-01 | 1.33 | WT-Avg | 3.80E-03 | 7.40E-02 |
| sp Q8BFQ4 WDR82_MOUSE  | WD repeat-containing protein 82 OS=Mus musculus GN=Wdr82 PE=1 SV=1                                | 9145        | 11660       | -3.76E-01 | 1.30 | D5-Avg | 3.79E-03 | 7.40E-02 |
| sp Q8R2G4 NAR3_MOUSE   | Ecto-ADP-ribosyltransferase 3 OS=Mus musculus GN=Art3 PE=1 SV=2                                   | 471362.6667 | 360970.3333 | -3.57E-01 | 1.28 | WT-Avg | 4.16E-03 | 7.74E-02 |
| sp Q61586 GPA1T_MOUSE  | Glycerol-3-phosphate acyltransferase 1, mitochondrial OS=Mus musculus GN=Gpam PE=1 SV=2           | 19696.33333 | 15551.33333 | -3.18E-01 | 1.25 | WT-Avg | 4.45E-03 | 8.11E-02 |
| sp Q9EPJ9 ARFG1_MOUSE  | ADP-ribosylation factor GTPase-activating protein 1 OS=Mus musculus GN=Arfgap1 PE=1 SV=2          | 26870.33333 | 33648       | -3.42E-01 | 1.27 | D5-Avg | 5.78E-03 | 9.79E-02 |
