# Supplementary material for: p300 and cAMP response element‐binding protein‐binding protein in skeletal muscle homeostasis, contractile function, and survival
Source: PubMed Central journal article supplement — J Cachexia Sarcopenia Muscle. 2020 Jan 3;11(2):464–77. doi: 10.1002/jcsm.12522 (PMC7113519; doi:10.1002/jcsm.12522), 2020-01-03
Supplement: JCSM-11-464-s006.pdf [file JCSM-11-464-s006.pdf]

**Table S4. Functional annotation of Clusters from TMT-MS data.**

List of significant (false discovery rate [FDR]<0.05) gene ontology terms associated with proteins differentially expressed in WT vs. PCKO mice.

| <b>Cluster 1 - Gene ontology: Biological Processes (GO:BP)</b> |                                                                                          |                |            |
|----------------------------------------------------------------|------------------------------------------------------------------------------------------|----------------|------------|
| <b>GO term</b>                                                 | <b>Description</b>                                                                       | <b>p-value</b> | <b>FDR</b> |
| GO:1901566                                                     | organonitrogen compound biosynthetic process                                             | 0              | 0          |
| GO:0043603                                                     | cellular amide metabolic process                                                         | 0              | 0          |
| GO:0006518                                                     | peptide metabolic process                                                                | 0              | 0          |
| GO:0043604                                                     | amide biosynthetic process                                                               | 0              | 0          |
| GO:0043043                                                     | peptide biosynthetic process                                                             | 0              | 0          |
| GO:0006412                                                     | translation                                                                              | 0              | 0          |
| GO:0022613                                                     | ribonucleoprotein complex biogenesis                                                     | 0              | 0          |
| GO:0042254                                                     | ribosome biogenesis                                                                      | 0              | 0          |
| GO:0002181                                                     | cytoplasmic translation                                                                  | 0              | 0          |
| GO:0042255                                                     | ribosome assembly                                                                        | 0              | 0          |
| GO:0022618                                                     | ribonucleoprotein complex assembly                                                       | 4.22E-15       | 3.46E-12   |
| GO:0042274                                                     | ribosomal small subunit biogenesis                                                       | 5.33E-15       | 4.00E-12   |
| GO:0071826                                                     | ribonucleoprotein complex subunit organization                                           | 1.11E-14       | 7.70E-12   |
| GO:0042273                                                     | ribosomal large subunit biogenesis                                                       | 1.93E-14       | 1.24E-11   |
| GO:0000027                                                     | ribosomal large subunit assembly                                                         | 8.84E-13       | 5.31E-10   |
| GO:0000028                                                     | ribosomal small subunit assembly                                                         | 8.48E-11       | 4.78E-08   |
| GO:0006364                                                     | rRNA processing                                                                          | 1.14E-09       | 6.04E-07   |
| GO:0016072                                                     | rRNA metabolic process                                                                   | 5.22E-09       | 2.61E-06   |
| GO:0006417                                                     | regulation of translation                                                                | 2.86E-08       | 1.36E-05   |
| GO:0005977                                                     | glycogen metabolic process                                                               | 7.59E-08       | 3.11E-05   |
| GO:0006073                                                     | cellular glucan metabolic process                                                        | 7.59E-08       | 3.11E-05   |
| GO:0044042                                                     | glucan metabolic process                                                                 | 7.59E-08       | 3.11E-05   |
| GO:0034248                                                     | regulation of cellular amide metabolic process                                           | 1.20E-07       | 4.72E-05   |
| GO:0065003                                                     | protein-containing complex assembly                                                      | 1.69E-07       | 6.34E-05   |
| GO:0034660                                                     | ncRNA metabolic process                                                                  | 2.26E-07       | 8.16E-05   |
| GO:0006112                                                     | energy reserve metabolic process                                                         | 2.91E-07       | 1.01E-04   |
| GO:0000462                                                     | maturation of SSU-rRNA from tricistronic rRNA transcript (SSU-rRNA, 5.8S rRNA, LSU-rRNA) | 3.11E-07       | 1.04E-04   |
| GO:0043933                                                     | protein-containing complex subunit organization                                          | 4.49E-07       | 1.45E-04   |
| GO:0044264                                                     | cellular polysaccharide metabolic process                                                | 5.18E-07       | 1.61E-04   |
| GO:0034470                                                     | ncRNA processing                                                                         | 5.55E-07       | 1.67E-04   |
| GO:0070925                                                     | organelle assembly                                                                       | 6.08E-07       | 1.77E-04   |
| GO:0010608                                                     | posttranscriptional regulation of gene expression                                        | 8.05E-07       | 2.27E-04   |
| GO:0005976                                                     | polysaccharide metabolic process                                                         | 9.97E-07       | 2.72E-04   |

|            |                                                     |          |             |
|------------|-----------------------------------------------------|----------|-------------|
| GO:0030490 | maturation of SSU-rRNA                              | 1.38E-06 | 3.66E-04    |
| GO:0034622 | cellular protein-containing complex assembly        | 2.87E-06 | 7.39E-04    |
| GO:0015980 | energy derivation by oxidation of organic compounds | 3.26E-05 | 0.008168703 |
| GO:0005978 | glycogen biosynthetic process                       | 5.03E-05 | 0.011938724 |
| GO:0009250 | glucan biosynthetic process                         | 5.03E-05 | 0.011938724 |

| <b>Cluster 2 - Gene ontology: Biological Processes (GO:BP)</b> |                                                  |                |             |
|----------------------------------------------------------------|--------------------------------------------------|----------------|-------------|
| <b>GO term</b>                                                 | <b>Description</b>                               | <b>p-value</b> | <b>FDR</b>  |
| GO:0007010                                                     | cytoskeleton organization                        | 2.52E-08       | 2.27E-04    |
| GO:0007519                                                     | skeletal muscle tissue development               | 1.71E-07       | 5.22E-04    |
| GO:0061061                                                     | muscle structure development                     | 1.74E-07       | 5.22E-04    |
| GO:0060538                                                     | skeletal muscle organ development                | 2.39E-07       | 5.40E-04    |
| GO:0030029                                                     | actin filament-based process                     | 5.50E-07       | 9.31E-04    |
| GO:0007517                                                     | muscle organ development                         | 6.20E-07       | 9.31E-04    |
| GO:0014706                                                     | striated muscle tissue development               | 9.87E-07       | 0.001271472 |
| GO:0060537                                                     | muscle tissue development                        | 1.47E-06       | 0.001654921 |
| GO:0042692                                                     | muscle cell differentiation                      | 2.82E-05       | 0.02705853  |
| GO:0048641                                                     | regulation of skeletal muscle tissue development | 3.00E-05       | 0.02705853  |
| GO:0055001                                                     | muscle cell development                          | 3.38E-05       | 0.027669422 |
| GO:0030036                                                     | actin cytoskeleton organization                  | 4.51E-05       | 0.033883856 |

| <b>Cluster 3 - Gene ontology: Biological Processes (GO:BP)</b> |                                                    |                |            |
|----------------------------------------------------------------|----------------------------------------------------|----------------|------------|
| <b>GO term</b>                                                 | <b>Description</b>                                 | <b>p-value</b> | <b>FDR</b> |
| GO:0046907                                                     | intracellular transport                            | 2.22E-15       | 1.00E-11   |
| GO:0034613                                                     | cellular protein localization                      | 2.66E-15       | 1.00E-11   |
| GO:0070727                                                     | cellular macromolecule localization                | 3.33E-15       | 1.00E-11   |
| GO:0045184                                                     | establishment of protein localization              | 1.67E-14       | 3.75E-11   |
| GO:0015031                                                     | protein transport                                  | 4.37E-14       | 7.89E-11   |
| GO:0015833                                                     | peptide transport                                  | 1.15E-13       | 1.71E-10   |
| GO:0006886                                                     | intracellular protein transport                    | 1.33E-13       | 1.71E-10   |
| GO:0042886                                                     | amide transport                                    | 1.94E-13       | 2.19E-10   |
| GO:0051649                                                     | establishment of localization in cell              | 1.66E-12       | 1.67E-09   |
| GO:0033365                                                     | protein localization to organelle                  | 6.07E-10       | 5.47E-07   |
| GO:0044248                                                     | cellular catabolic process                         | 4.55E-08       | 3.73E-05   |
| GO:0016192                                                     | vesicle-mediated transport                         | 3.58E-07       | 2.69E-04   |
| GO:0007034                                                     | vacuolar transport                                 | 4.07E-07       | 2.81E-04   |
| GO:0036503                                                     | ERAD pathway                                       | 4.36E-07       | 2.81E-04   |
| GO:0009894                                                     | regulation of catabolic process                    | 6.58E-07       | 3.74E-04   |
| GO:0072657                                                     | protein localization to membrane                   | 6.64E-07       | 3.74E-04   |
| GO:1901575                                                     | organic substance catabolic process                | 9.10E-07       | 4.83E-04   |
| GO:0072594                                                     | establishment of protein localization to organelle | 1.10E-06       | 5.49E-04   |

|            |                                                        |          |             |
|------------|--------------------------------------------------------|----------|-------------|
| GO:0072665 | protein localization to vacuole                        | 2.33E-06 | 0.001107194 |
| GO:0050821 | protein stabilization                                  | 5.45E-06 | 0.002457095 |
| GO:0007031 | peroxisome organization                                | 5.73E-06 | 0.002462005 |
| GO:0009057 | macromolecule catabolic process                        | 9.20E-06 | 0.003772423 |
| GO:0072666 | establishment of protein localization to vacuole       | 1.03E-05 | 0.004024816 |
| GO:0030433 | ubiquitin-dependent ERAD pathway                       | 1.24E-05 | 0.004666264 |
| GO:0016236 | macroautophagy                                         | 1.53E-05 | 0.005411462 |
| GO:0031329 | regulation of cellular catabolic process               | 1.56E-05 | 0.005411462 |
| GO:0006457 | protein folding                                        | 2.46E-05 | 0.008214725 |
| GO:0006914 | autophagy                                              | 2.99E-05 | 0.009303523 |
| GO:0061919 | process utilizing autophagic mechanism                 | 2.99E-05 | 0.009303523 |
| GO:1904292 | regulation of ERAD pathway                             | 4.17E-05 | 0.012536745 |
| GO:0007029 | endoplasmic reticulum organization                     | 4.59E-05 | 0.013363737 |
| GO:0008333 | endosome to lysosome transport                         | 5.06E-05 | 0.014161841 |
| GO:0009895 | negative regulation of catabolic process               | 5.18E-05 | 0.014161841 |
| GO:0044265 | cellular macromolecule catabolic process               | 5.62E-05 | 0.014726019 |
| GO:0006623 | protein targeting to vacuole                           | 5.72E-05 | 0.014726019 |
| GO:0140029 | exocytic process                                       | 7.02E-05 | 0.017396138 |
| GO:0009896 | positive regulation of catabolic process               | 7.32E-05 | 0.017396138 |
| GO:0007041 | lysosomal transport                                    | 7.48E-05 | 0.017396138 |
| GO:0002026 | regulation of the force of heart contraction           | 7.64E-05 | 0.017396138 |
| GO:0031330 | negative regulation of cellular catabolic process      | 7.72E-05 | 0.017396138 |
| GO:0061024 | membrane organization                                  | 8.74E-05 | 0.019220065 |
| GO:1904294 | positive regulation of ERAD pathway                    | 1.01E-04 | 0.021707869 |
| GO:0043933 | protein-containing complex subunit organization        | 1.14E-04 | 0.023975191 |
| GO:0009225 | nucleotide-sugar metabolic process                     | 1.28E-04 | 0.026186294 |
| GO:1903441 | protein localization to ciliary membrane               | 1.31E-04 | 0.026186294 |
| GO:0006605 | protein targeting                                      | 1.34E-04 | 0.026316189 |
| GO:1901565 | organonitrogen compound catabolic process              | 1.65E-04 | 0.031708906 |
| GO:1901698 | response to nitrogen compound                          | 1.74E-04 | 0.03249617  |
| GO:0048193 | Golgi vesicle transport                                | 1.77E-04 | 0.03249617  |
| GO:0007033 | vacuole organization                                   | 2.00E-04 | 0.036102939 |
| GO:0031647 | regulation of protein stability                        | 2.11E-04 | 0.037232303 |
| GO:1905897 | regulation of response to endoplasmic reticulum stress | 2.31E-04 | 0.040089763 |
| GO:1990778 | protein localization to cell periphery                 | 2.61E-04 | 0.044330295 |
| GO:0090150 | establishment of protein localization to membrane      | 2.88E-04 | 0.048138393 |
| GO:0003009 | skeletal muscle contraction                            | 3.03E-04 | 0.049432208 |
| GO:0060341 | regulation of cellular localization                    | 3.07E-04 | 0.049432208 |
