# Supplementary material for: p300 and cAMP response element‐binding protein‐binding protein in skeletal muscle homeostasis, contractile function, and survival
Source: PubMed Central journal article supplement — J Cachexia Sarcopenia Muscle. 2020 Jan 3;11(2):464–77. doi: 10.1002/jcsm.12522 (PMC7113519; doi:10.1002/jcsm.12522), 2020-01-03
Supplement: JCSM-11-464-s007.pdf [file JCSM-11-464-s007.pdf]

**Table S5.** Primers used in qPCR analysis.

| <b>Primer name</b>            | <b>Forward sequence</b> | <b>Reverse sequence</b> |
|-------------------------------|-------------------------|-------------------------|
| <b><i>Acta1</i></b>           | AGAGCTATAAAGCTGCGCTCC   | AGCTTTGGTGGGTTCTGTAGG   |
| <b><i>Casq1</i></b>           | AGAACCCCGACCTCAGTATCA   | TGGAGCTGACAGGTCAATGTC   |
| <b><i>Col6a1</i></b>          | AGGTCATCAGCCAGACCATTG   | CAGCCTGGCACTCAAAGAAG    |
| <b><i>Des</i></b>             | GTATGAGACCATCGCGGCTAA   | GCAGCGCATCGTTGTTCTTAT   |
| <b><i>Dhpr (Cacna1s)</i></b>  | GTCCAGGGGAACCTTCCAAAA   | CCTGTGTGATCCAGCTCATGT   |
| <b><i>Lama2</i></b>           | TGAAAGCAAGGCCAGAAGTCA   | CACCAACATAATCAGGGCTGC   |
| <b><i>Myh7</i></b>            | GCTGGGAAGACTGTCAACACTA  | CCTGGGGTCTGGTCCTTCTT    |
| <b><i>Myh8</i></b>            | CGGGAGGTTACACCAAAAATC   | CAAGTGACCCAGCAAGCGA     |
| <b><i>Mypn</i></b>            | TACACATTGAGTCCACCCACG   | TTCGAATGGGCAAACCCTGTA   |
| <b><i>Nos1</i></b>            | GAAGTGACCAACCGCCTTAGA   | GGAGGATCCAGTTAGGAGCTG   |
| <b><i>Ryr1</i></b>            | GGAGAGAAAGTCATGGCGGAT   | GTTCCCAGTCTGTGTCCGTAG   |
| <b><i>Serca1 (Atp2a1)</i></b> | TGAACCGTGTCACAGATCCAG   | TTGGCTGAAGATGCATGGCTA   |
| <b><i>Tnnc1</i></b>           | AAGAGCTCATGAAGGACGGTG   | GCAAGACCAGCATCTACTCCA   |
| <b><i>Tnni1</i></b>           | CATGCCGGAAGTTGAGAGGAA   | CTTGGCTAGCATCAGGCTCTT   |
| <b><i>Tnnt1</i></b>           | GAAGATTCCAGAAGGGGAGCG   | TCCTCCTTTTTCCGCTGTTCA   |
| <b><i>Tpm2</i></b>            | CTGGCTACAGCCTTGCAAAG    | TTTCTCATCCTTCATGGCCC    |
| <b><i>Ttn</i></b>             | TCGACTGAGGCTGAGATGAGA   | TCCACTGATGGTCACTTGCTC   |
