# Supplementary figures and images for: p300 and cAMP response element‐binding protein‐binding protein in skeletal muscle homeostasis, contractile function, and survival
Source: PubMed Central journal article supplement — J Cachexia Sarcopenia Muscle. 2020 Jan 3;11(2):464–77. doi: 10.1002/jcsm.12522 (PMC7113519; doi:10.1002/jcsm.12522), 2020-01-03

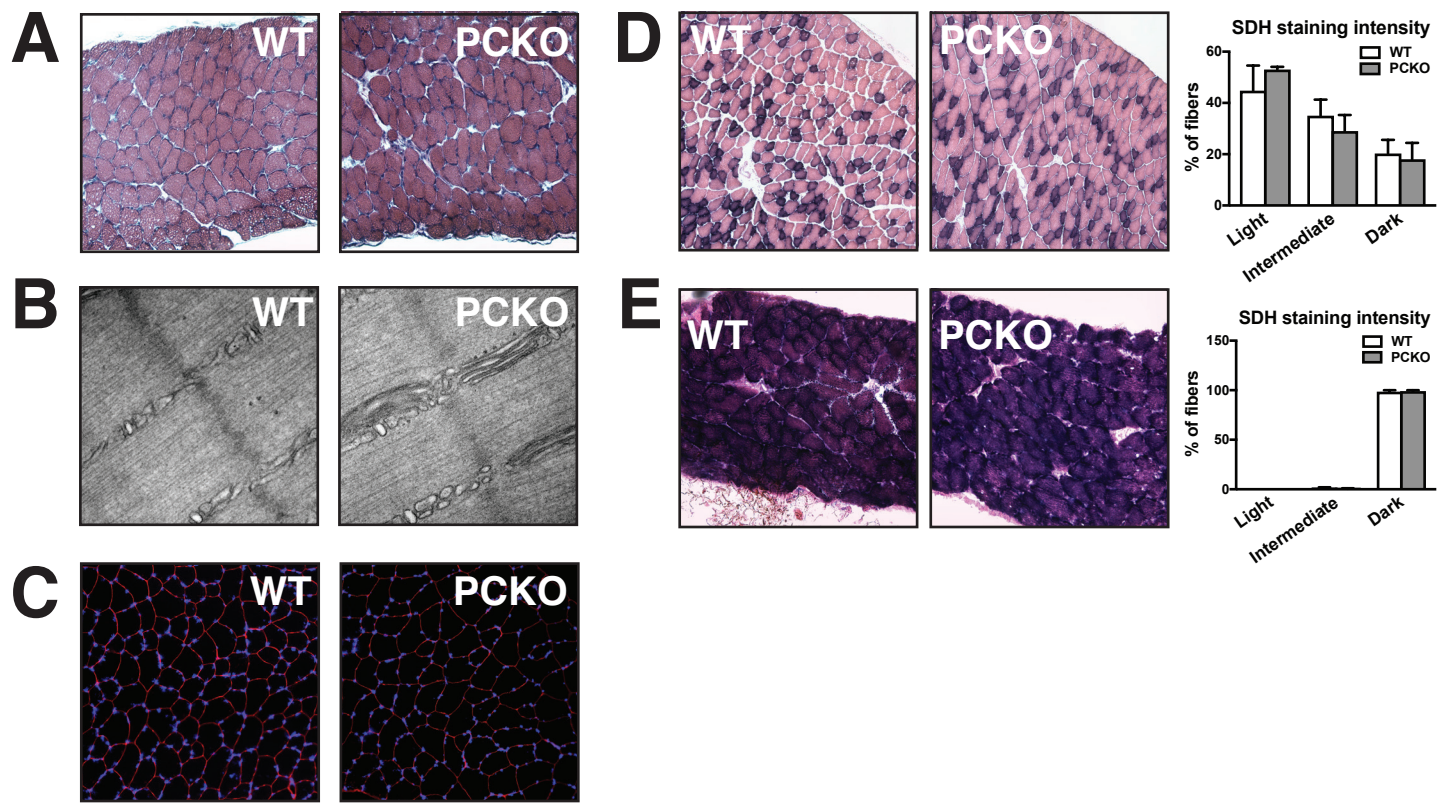

**SI Figure 1**

Supplement: JCSM-11-464-s002.pdf [file JCSM-11-464-s002.pdf]
